# Supplementary material for: Polychromic Reporter Mice Reveal Unappreciated Innate Lymphoid Cell Progenitor Heterogeneity and Elusive ILC3 Progenitors in Bone Marrow
Source: PubMed Central journal article supplement (PMC6642165; doi:10.1016/j.immuni.2019.05.002), 2019-07-16
Supplement: mmc1.pdf [file mmc1.pdf]

**Immunity, Volume 51**

**Supplemental Information**

**Polychromic Reporter Mice Reveal Unappreciated  
Innate Lymphoid Cell Progenitor Heterogeneity  
and Elusive ILC3 Progenitors in Bone Marrow**

**Jennifer A. Walker, Paula A. Clark, Alastair Crisp, Jillian L. Barlow, Aydan Szeto, Ana C.F. Ferreira, Batika M.J. Rana, Helen E. Jolin, Noe Rodriguez-Rodriguez, Meera Sivasubramaniam, Richard Pannell, James Cruickshank, Maria Daly, Liora Haim-Vilmovsky, Sarah A. Teichmann, and Andrew N.J. McKenzie**

## SUPPLEMENTAL INFORMATION

### Figure S1. Generation and immune phenotyping of *Rorc*<sup>Kat</sup> mice. Related to Figure 1.

(A) Gene-targeting strategy used to generate the *Rorc*<sup>Kat</sup> strain (WT = wildtype). (B) Southern blot analysis of *EcoRV*-digested (left) and *HindIII*-digested (right) genomic DNA from WT and *Rorc*<sup>Kat/+</sup> mice (TG = Transgenic). (C) Frequency of the indicated ILC populations in the siLP of *Rorc*<sup>Kat</sup> littermates (gated as in Figure 1A). (D) Gating of thymocyte populations in *Rorc*<sup>Kat</sup> littermates. (E) Frequency of thymocyte populations in *Rorc*<sup>Kat</sup> littermates (DP = CD4<sup>+</sup>CD8<sup>+</sup>, CD4SP = CD4<sup>+</sup>CD8<sup>-</sup>, CD8SP = CD4<sup>-</sup>CD8<sup>+</sup>). (F) Rorc-Kat fluorescence of DP thymocytes from the indicated *Rorc*<sup>Kat</sup> littermates. (G) Rorc-Kat fluorescence of CD45<sup>+</sup>Lin<sup>-</sup>IL-7R $\alpha$ <sup>+</sup>CD4<sup>-</sup>KLRG1<sup>-</sup>NKp46<sup>+</sup>NK1.1<sup>+</sup> ILC3s in the siLP of *Rorc*<sup>Kat</sup> littermates. Data are representative of 2 independent experiments with 3 - 4 mice per group. Data represent mean  $\pm$  SEM; not significant (ns); one-way ANOVA with *Dunnnett's* post-hoc test.

### Figure S2. Generation and immune phenotyping of *Id2*<sup>BFP</sup> mice. Related to Figure 1.

(A) Gene-targeting strategy to generate the *Id2*<sup>BFP</sup> strain and location of nested primers (F1, R1, F2 and R2) used for sequence verification of gene-targeting (WT = wildtype). (B) Southern blot analysis of *KpnI*-digested genomic DNA from wildtype and heterozygous *Id2*<sup>BFP/+</sup> mice (TG = Transgenic). (C) Id2-BFP fluorescence of splenic NK cells (CD45<sup>+</sup>CD3<sup>-</sup>CD19<sup>-</sup>NK1.1<sup>+</sup>NKp46<sup>+</sup>) from *Id2*<sup>BFP</sup> littermates. (D) Frequency of the indicated ILC populations in the siLP of *Id2*<sup>BFP</sup> littermates (gated as in Figure 1A). (E) Frequency of CD11c<sup>+</sup>MHCII<sup>+</sup> dendritic cells (DC) in the spleen of *Id2*<sup>BFP</sup> littermates. (F) Frequency of the indicated splenic lymphocytes in *Id2*<sup>BFP</sup> littermates (naïve CD4<sup>+</sup> = CD45<sup>+</sup>CD3<sup>+</sup>CD4<sup>+</sup>CD62L<sup>hi</sup>CD44<sup>lo</sup>; activated CD4<sup>+</sup> = CD45<sup>+</sup>CD3<sup>+</sup>CD4<sup>+</sup>CD62L<sup>lo</sup>CD44<sup>hi</sup>; CD25<sup>+</sup>CD4<sup>+</sup> = CD45<sup>+</sup>CD3<sup>+</sup>CD4<sup>+</sup>CD25<sup>+</sup>; CD8<sup>+</sup> = CD45<sup>+</sup>CD3<sup>+</sup>CD8<sup>+</sup>, NK1.1<sup>+</sup>NKp46<sup>+</sup> = CD45<sup>+</sup>CD3<sup>-</sup>CD19<sup>-</sup>NK1.1<sup>+</sup>NKp46<sup>+</sup>). Data are representative of 2 independent experiments with 4 - 5 mice per group. Data represent mean  $\pm$  SEM; not significant (ns); one-way ANOVA with *Dunnnett's* post-hoc test.

### Figure S3. Generation and immune phenotyping of *Gata3*<sup>hCD2</sup> mice. Related to Figure 1

(A) Gene-targeting strategy to generate the *Gata3*<sup>hCD2</sup> strain and location of forward (F) and reverse (R) primers used for sequence verification of gene-targeting (WT = wildtype). (B) Southern blot analysis of *KpnI*-digested genomic DNA from wildtype and heterozygous *Gata3*<sup>hCD2</sup> mice (TG = Transgenic). Tracks either side of the dashed line were not adjacent on the original autoradiograph. (C) *Gata3*-hCD2 expression in ILC2 (CD45<sup>+</sup>Lin<sup>-</sup>IL-7R $\alpha$ <sup>+</sup>KLRG1<sup>+</sup>) from the mesenteric lymph node (MLN) of *Gata3*<sup>hCD2</sup> littermates following intraperitoneal (i.p.) injection of PBS or 0.5  $\mu$ g IL-33 i.p on 3 consecutive days. (D) Numbers of ILC2 (CD45<sup>+</sup>Lin<sup>-</sup>

IL-7R $\alpha$ <sup>+</sup>KLRG1<sup>+</sup>) in the MLN of *Gata3*<sup>hCD2</sup> littermates and C57Bl/6 controls following i.p. injection of PBS or 0.5  $\mu$ g IL-33 on 3 consecutive days. (E) Frequency of cytokine-producing ILC2 (CD45<sup>+</sup>Lin<sup>-</sup>IL-7R $\alpha$ <sup>+</sup>KLRG1<sup>+</sup>) in the MLN of *Gata3*<sup>hCD2</sup> littermates and C57Bl/6 controls following i.p. injection of 0.5  $\mu$ g IL-33 on 3 consecutive days. (F) Frequency of ILC2 (CD45<sup>+</sup>Lin<sup>-</sup>IL-7R $\alpha$ <sup>+</sup>CD25<sup>+</sup>ST2<sup>+</sup>) in lung from *Gata3*<sup>hCD2</sup> littermates and C57Bl/6 controls. (G) Frequency of ILC2P (CD45<sup>+</sup>Lin<sup>-</sup>IL-7R $\alpha$ <sup>+</sup>Flt3<sup>-</sup>Sca-1<sup>+</sup> $\alpha$ 4 $\beta$ 7<sup>int</sup>ST2<sup>+</sup>) in bone marrow from *Gata3*<sup>hCD2</sup> littermates and C57Bl/6 controls. (H) Frequency of the indicated ILC populations in the siLP of *Gata3*<sup>hCD2</sup> littermates (gated as in Figure 1A). (I) Frequency of the indicated splenic lymphocytes in *Gata3*<sup>hCD2</sup> littermates (naïve CD4<sup>+</sup> = CD45<sup>+</sup>CD3<sup>+</sup>CD4<sup>+</sup>CD62L<sup>hi</sup>CD44<sup>lo</sup>; activated CD4<sup>+</sup> = CD45<sup>+</sup>CD3<sup>+</sup>CD4<sup>+</sup>CD62L<sup>lo</sup>CD44<sup>hi</sup>; CD25<sup>+</sup>CD4<sup>+</sup> = CD45<sup>+</sup>CD3<sup>+</sup>CD4<sup>+</sup>CD25<sup>+</sup>; CD8<sup>+</sup> = CD45<sup>+</sup>CD3<sup>+</sup>CD8<sup>+</sup>, NK1.1<sup>+</sup>NKp46<sup>+</sup> = CD45<sup>+</sup>CD3<sup>-</sup>CD19<sup>-</sup>NK1.1<sup>+</sup>NKp46<sup>+</sup>). Data are representative of two independent experiments with 3 - 6 mice per group. Data represent mean  $\pm$  SEM; not significant (ns); one-way ANOVA with *Dunnett's* post-hoc test.

**Figure S4. Generation and immune phenotyping of *Rora*<sup>Teal</sup> mice. Related to Figure 1**

(A) Gene-targeting strategy used to generate the *Rora*<sup>Teal</sup> strain (WT = wildtype). (B) Southern blot analysis of *Nco1*-digested genomic DNA from wildtype and heterozygous *Rora*<sup>Teal</sup> mice (TG = Transgenic). Tracks either side of the dashed line were not adjacent on the original autoradiograph. (C) *Rora*-Teal expression in ILC2 (CD45<sup>+</sup>Lin<sup>-</sup>IL-7R $\alpha$ <sup>+</sup>KLRG1<sup>+</sup>) from the MLN of *Rora*<sup>Teal</sup> littermates and C57Bl/6 controls following i.p. injection of PBS or 0.5  $\mu$ g IL-33 i.p. on 3 consecutive days. (D) *Rora*-Teal expression in ILC2P (CD45<sup>+</sup>Lin<sup>-</sup>IL-7R $\alpha$ <sup>+</sup>ST2<sup>+</sup>) from the bone marrow of *Rora*<sup>Teal</sup> littermates and C57Bl/6 controls. (E) Numbers of ILC2 (CD45<sup>+</sup>Lin<sup>-</sup>IL-7R $\alpha$ <sup>+</sup>KLRG1<sup>+</sup>) in the MLN of *Rora*<sup>Teal</sup> littermates and C57Bl/6 controls following i.p. injection of PBS or 0.5  $\mu$ g IL-33 on 3 consecutive days. (F) Frequency of cytokine-producing ILC2 (CD45<sup>+</sup>Lin<sup>-</sup>IL-7R $\alpha$ <sup>+</sup>KLRG1<sup>+</sup>) in the MLN of *Rora*<sup>Teal</sup> littermates and C57Bl/6 controls following i.p. injection of 0.5  $\mu$ g IL-33 on 3 consecutive days. (G) Frequency of ILC2 (CD45<sup>+</sup>Lin<sup>-</sup>IL-7R $\alpha$ <sup>+</sup>CD25<sup>+</sup>ST2<sup>+</sup>) in lung from *Rora*<sup>Teal</sup> littermates and C57Bl/6 controls. (H) Frequency of ILC2P (CD45<sup>+</sup>Lin<sup>-</sup>IL-7R $\alpha$ <sup>+</sup>Flt3<sup>-</sup>Sca-1<sup>+</sup> $\alpha$ 4 $\beta$ 7<sup>int</sup>ST2<sup>+</sup>) in bone marrow from *Rora*<sup>Teal</sup> littermates and C57Bl/6 controls. (I) Frequency of the indicated ILC populations in the siLP of *Rora*<sup>Teal</sup> littermates and C57Bl/6 controls (gated as described in Figure 1A). (J) Frequency of the indicated splenic lymphocytes in *Rora*<sup>Teal</sup> littermates and C57Bl/6 controls (naïve CD4<sup>+</sup> = CD45<sup>+</sup>CD3<sup>+</sup>CD4<sup>+</sup>CD62L<sup>hi</sup>CD44<sup>lo</sup>; activated CD4<sup>+</sup> = CD45<sup>+</sup>CD3<sup>+</sup>CD4<sup>+</sup>CD62L<sup>lo</sup>CD44<sup>hi</sup>; CD25<sup>+</sup>CD4<sup>+</sup> = CD45<sup>+</sup>CD3<sup>+</sup>CD4<sup>+</sup>CD25<sup>+</sup>; CD8<sup>+</sup> = CD45<sup>+</sup>CD3<sup>+</sup>CD8<sup>+</sup>, NK1.1<sup>+</sup>NKp46<sup>+</sup> = CD45<sup>+</sup>CD3<sup>-</sup>CD19<sup>-</sup>NK1.1<sup>+</sup>NKp46<sup>+</sup>). (K) Flow cytometry gating strategy for intracellular TF staining of Lin<sup>-</sup>NK1.1<sup>+</sup> cells from the indicated tissues of *Rora*<sup>+/Teal</sup> mice, compared to C57Bl/6

controls. Data are pooled from two independent experiments with 3 - 5 mice per group. Data represent mean  $\pm$  SEM; not significant (ns); one-way ANOVA with *Dunnnett's* post-hoc test.

**Figure S5. Generation of *Zbtb16*<sup>tdTom</sup> mice. Related to Figure 5**

(A) Gene-targeting strategy used to generate the *Zbtb16*<sup>tdTom</sup> strain and location of primers (F1, R1, F2 and R2) used for sequence verification of gene-targeting (WT = wildtype). (B) Southern blot analysis of *HinDIII*-digested genomic DNA from *Zbtb16*<sup>tdTom</sup> targeted ES cell clone using 5' probe indicated in (A). (C) *Zbtb16*-tdTom expression in NKT cells (CD4<sup>+</sup>TCR $\beta$ <sup>lo</sup>NK1.1<sup>+</sup>) from the liver of *Zbtb16*<sup>+tdTom</sup> and WT littermates compared to intracellular staining for PLZF. (D) Frequency of CLP (Lin<sup>-</sup>CD45<sup>+</sup>IL-7R $\alpha$ <sup>+</sup>Flt3<sup>+</sup>), ILC2P (Lin<sup>-</sup>CD45<sup>+</sup>IL-7R $\alpha$ <sup>+</sup> $\alpha$ 4 $\beta$ 7<sup>+</sup>Sca1<sup>hi</sup>Flt3<sup>-</sup>CD25<sup>+</sup>), CHILP (Lin<sup>-</sup>CD45<sup>+</sup>IL-7R $\alpha$ <sup>+</sup> $\alpha$ 4 $\beta$ 7<sup>hi</sup>Sca1<sup>int/lo</sup>Flt3<sup>-</sup>CD25<sup>-</sup>), and HSC (Lin<sup>-</sup>CD45<sup>+</sup>Kit<sup>+</sup>Sca1<sup>+</sup>Flt3<sup>-</sup>) in bone marrow from *Zbtb16*<sup>+tdTom</sup> and *Zbtb16*<sup>tdTom/tdTom</sup> littermates and C57Bl/6 controls. Data representative of two independent experiments with 4 - 8 mice per genotype. (E) Frequency of the indicated ILCs from *Zbtb16*<sup>+tdTom</sup> and *Zbtb16*<sup>tdTom/tdTom</sup> littermates and C57Bl/6 controls (gated as in Figure 1A) in siLP. Data are pooled from two independent experiments with 5 - 8 mice per genotype. (F) Frequency of NKT cells as defined in (C) in the liver of *Zbtb16*<sup>+tdTom</sup> and *Zbtb16*<sup>tdTom/tdTom</sup> littermates and C57Bl/6 controls. Data pooled from four independent experiments with 12 - 15 mice per genotype. (G) Frequency of the indicated splenic lymphocytes in *Zbtb16*<sup>+tdTom</sup> and *Zbtb16*<sup>tdTom/tdTom</sup> littermates and C57Bl/6 controls (naïve CD4<sup>+</sup> = CD45<sup>+</sup>CD3<sup>+</sup>CD4<sup>+</sup>CD62L<sup>hi</sup>CD44<sup>lo</sup>; activated CD4<sup>+</sup> = CD45<sup>+</sup>CD3<sup>+</sup>CD4<sup>+</sup>CD62L<sup>lo</sup>CD44<sup>hi</sup>; CD25<sup>+</sup>CD4<sup>+</sup> = CD45<sup>+</sup>CD3<sup>+</sup>CD4<sup>+</sup>CD25<sup>+</sup>; CD8<sup>+</sup> = CD45<sup>+</sup>CD3<sup>+</sup>CD8<sup>+</sup>, NK1.1<sup>+</sup> = CD45<sup>+</sup>CD3<sup>-</sup>CD19<sup>-</sup>NK1.1<sup>+</sup>). (H) Gating strategy and *Zbtb16*-Tom expression status of LTi cells from *Zbtb16*<sup>+tdTom</sup> embryonic liver (E15.5), as compared to WT controls. Data representative of n = 9. (D-G) Data represent mean  $\pm$  SEM; not significant (ns); one-way ANOVA with *Dunnnett's* post-hoc test.

**Figure S6. Gating and flow cytometry analysis of progenitor-derived ILC progeny. Related to Figure 6**

(A) Expression of T-bet in NK and ILC1 progeny arising from co-culture of the indicated bone marrow progenitor populations from 5x polychomILC mice with OP9 stromal cells and IL-2, IL-15, and IL-18 for 48 hrs. Data from one experiment. (B) Flow cytometric analysis of Bcl11b, Eomes, perforin, and IFN- $\gamma$  expression in LiveCD45.2<sup>+</sup> spleen cells stimulated with IL-2, IL-15, and IL-18, 6 weeks after transfer of IVb or IVc (CD45.2<sup>+</sup>) cells into *Rag2*<sup>-/-</sup>*Il2rgc*<sup>-/-</sup> recipients (CD45.1<sup>+</sup>). Concatenated samples from 4 - 5 mice in 2 independent experiments

**Figure S7. Extrapolation of pseudotime analysis to generate a revised model for ILC development in bone marrow. Related to Figure 7.**

(A) Individual overlays of populations I, II, III, IVa, IVb and IVc onto the pseudotime trajectory shown in main Figure 7E. Cells for which no index sequencing data were available are labelled 'undetermined'. (B) Revised model for ILC development in mouse bone marrow.

Figure S1

A

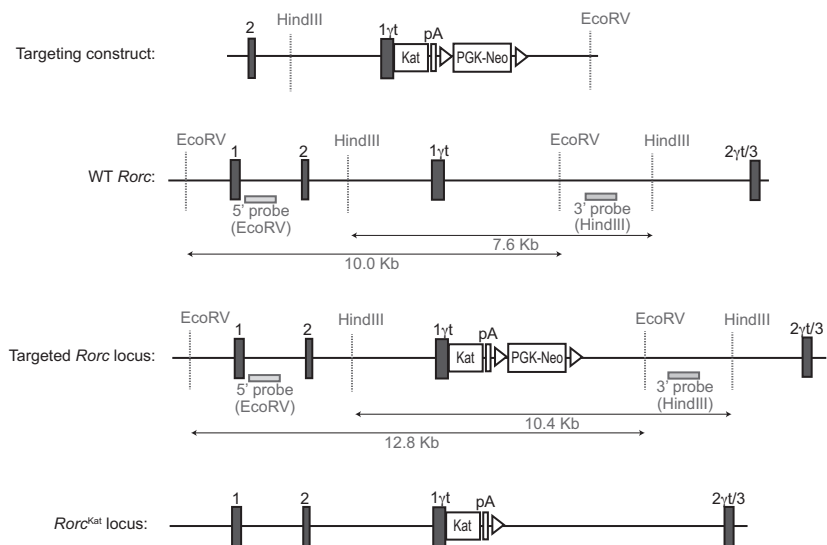

B

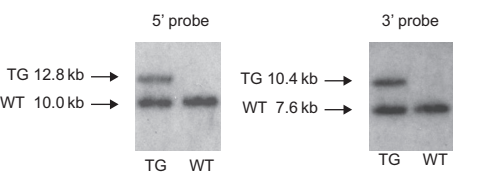

C

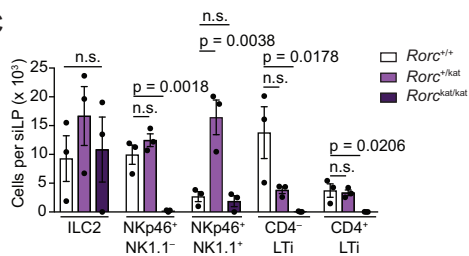

D

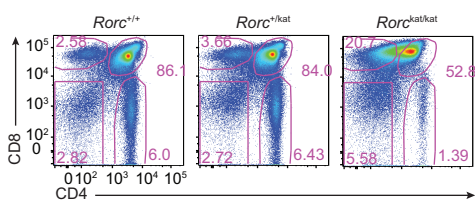

E

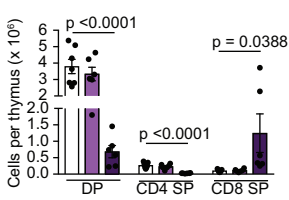

F

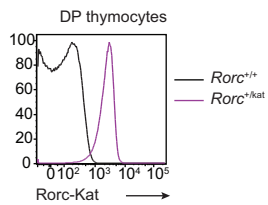

G

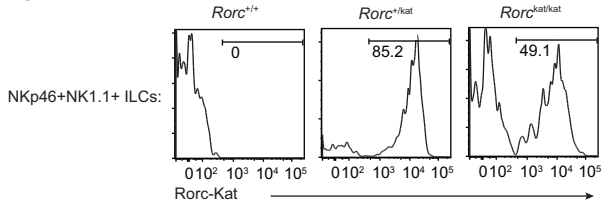

# Figure S2

## A

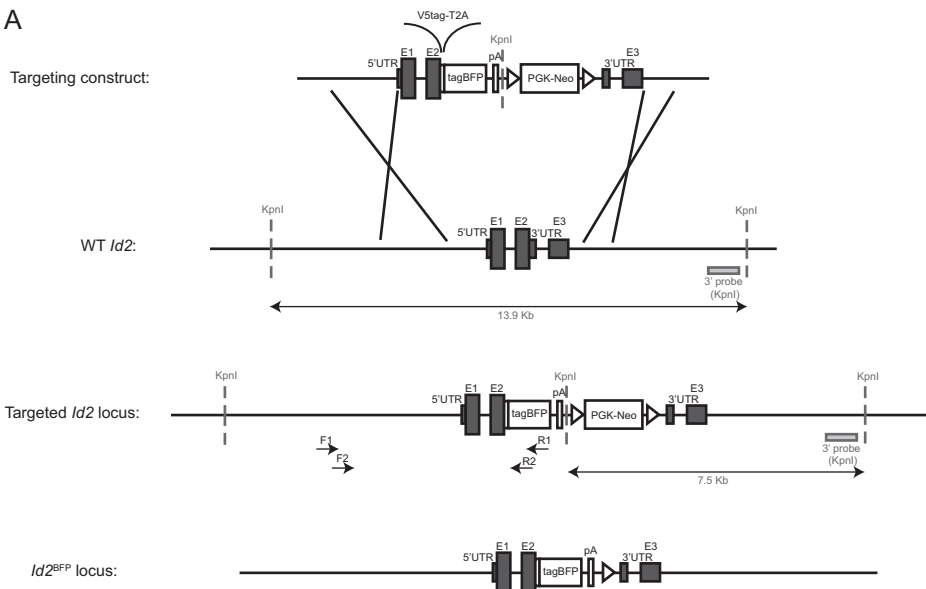

## B

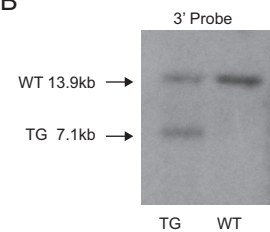

## C

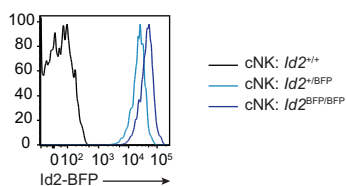

## D

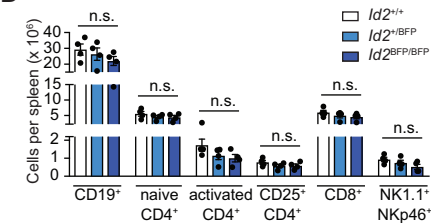

## E

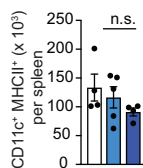

## F

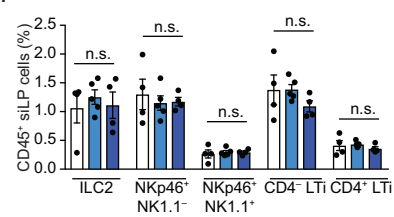

A

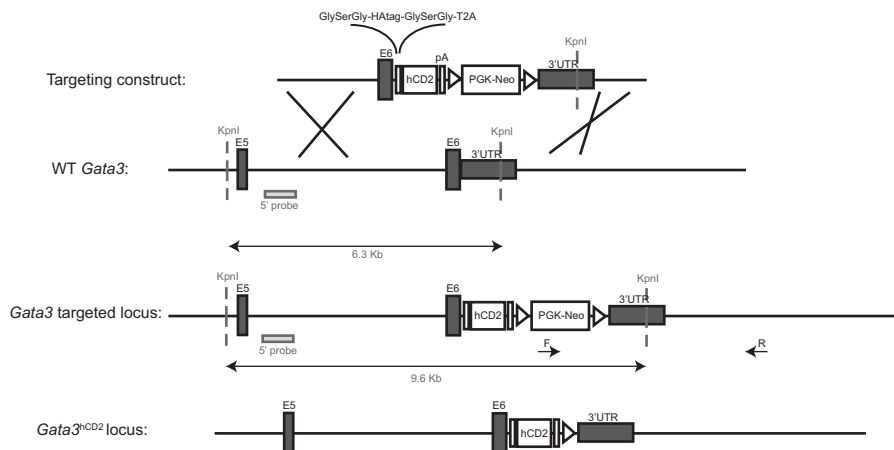

B

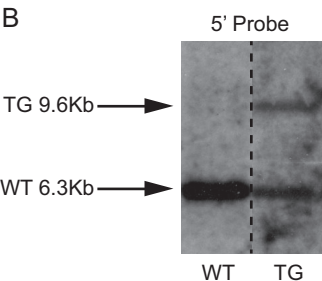

C

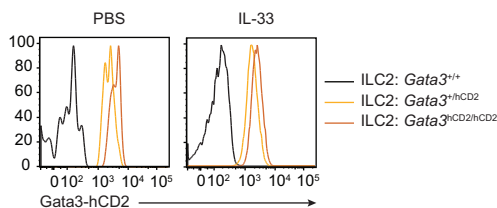

D

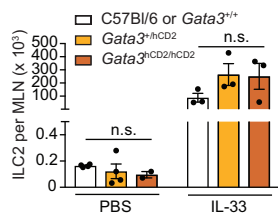

E

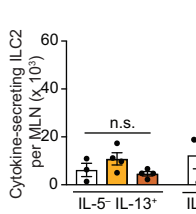

F

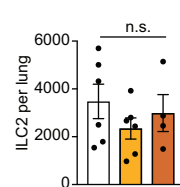

G

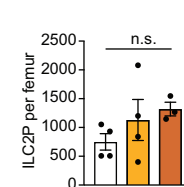

H

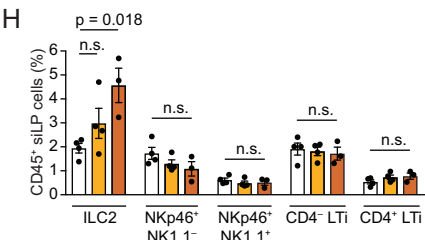

I

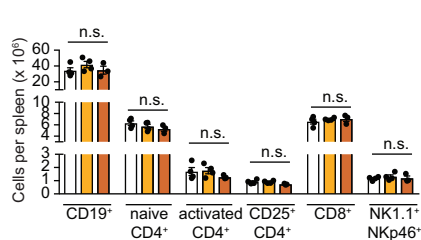



Figure S4

A

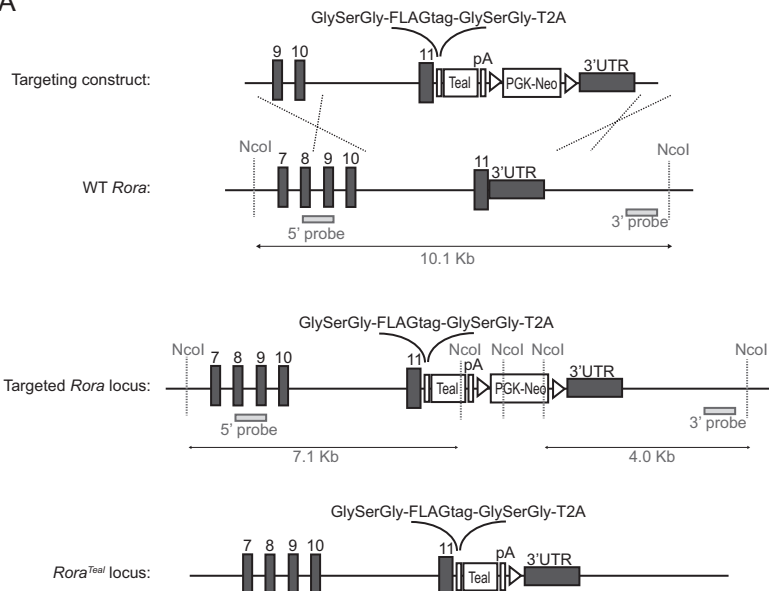

B

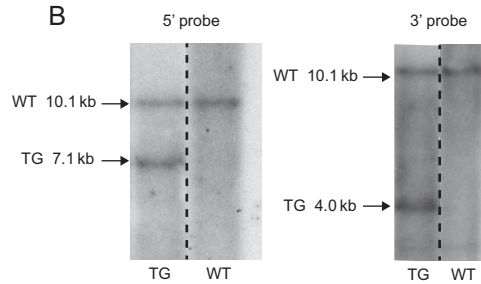

C

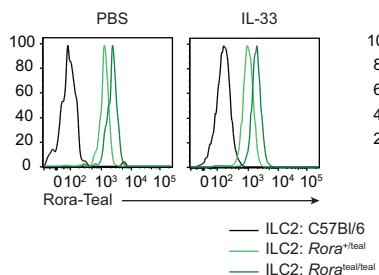

D

E

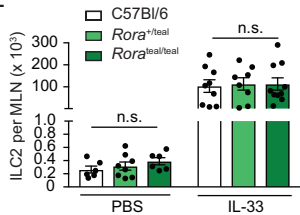

F

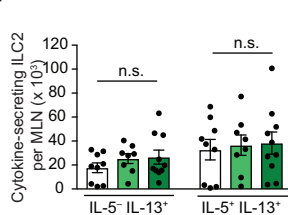

G

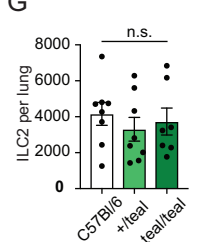

H

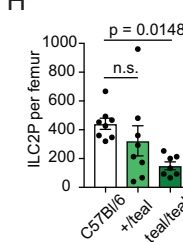

K

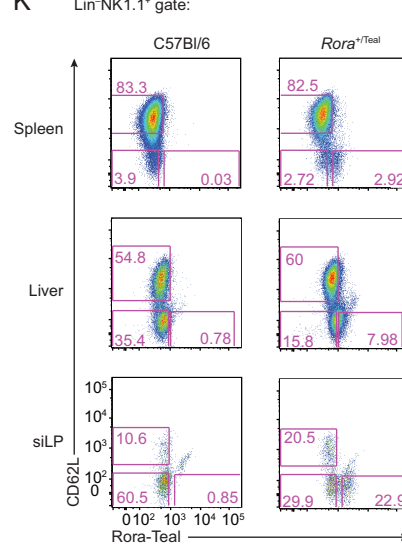

I

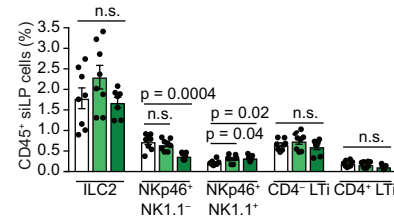

J

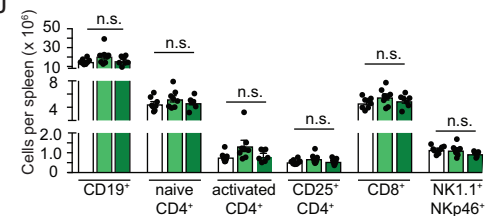

Figure S5

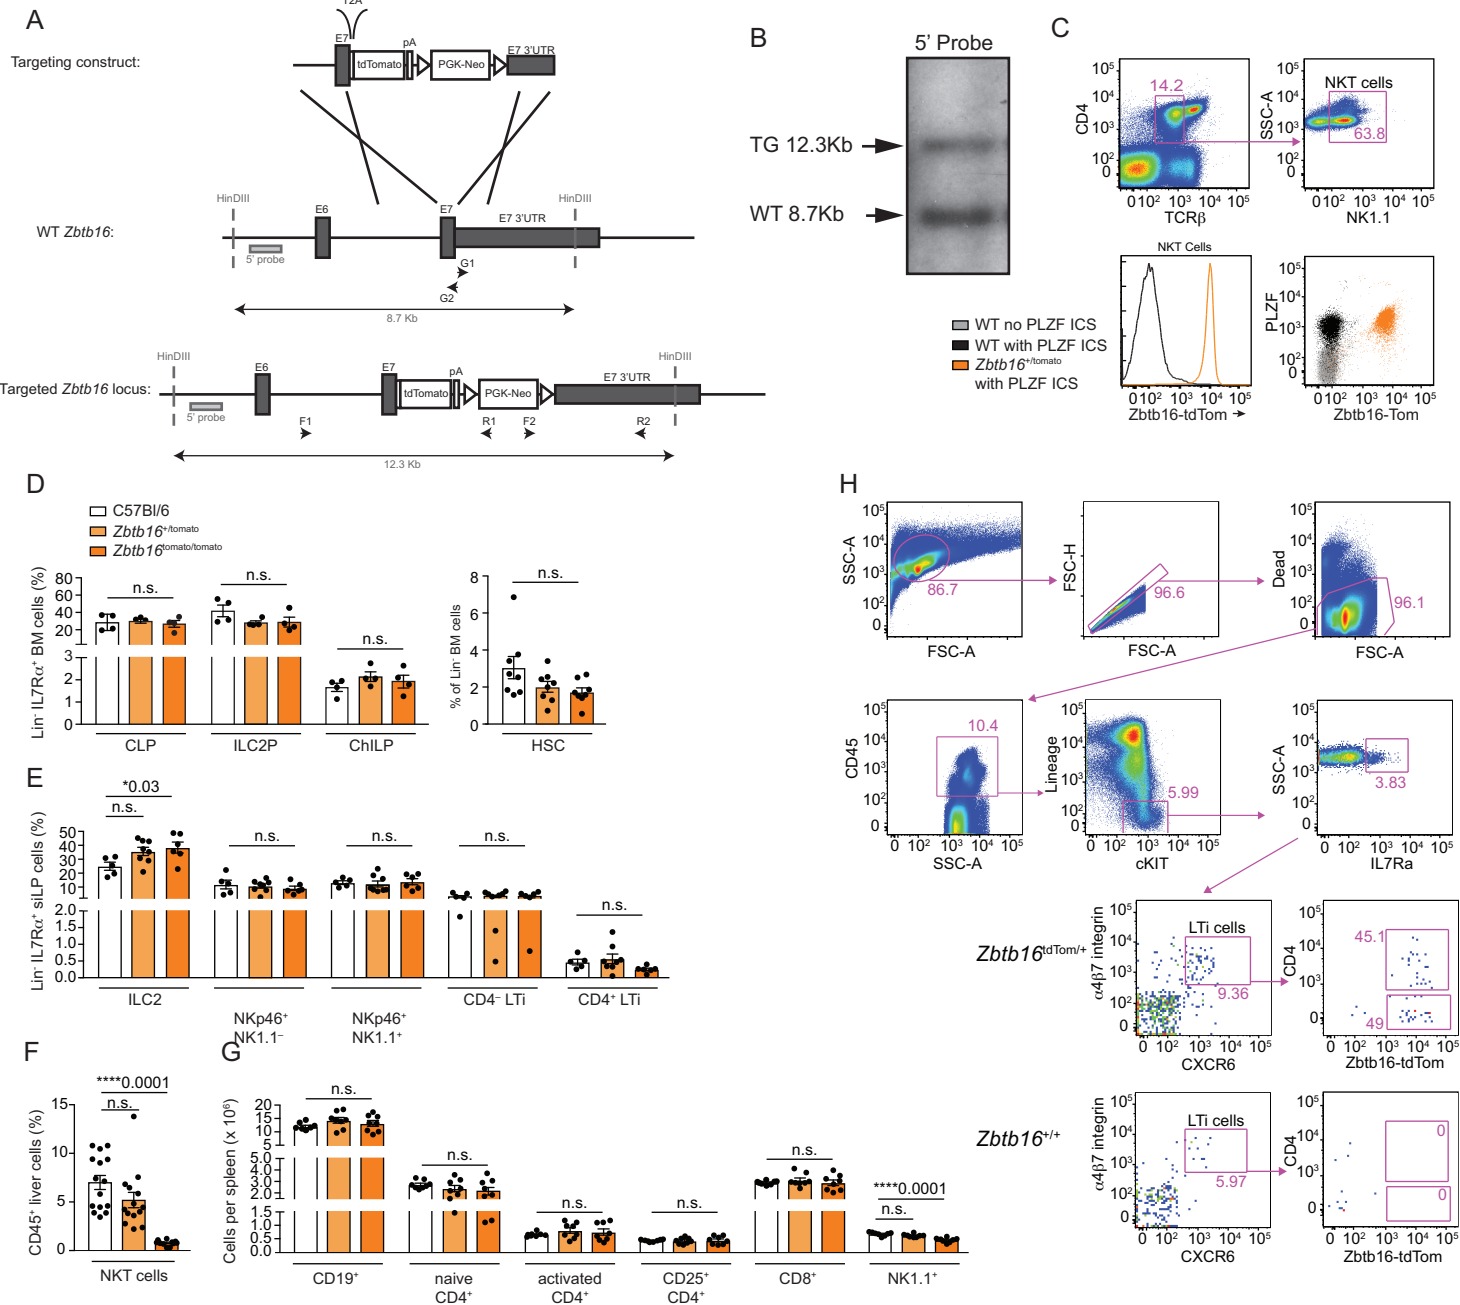

Figure S6

A

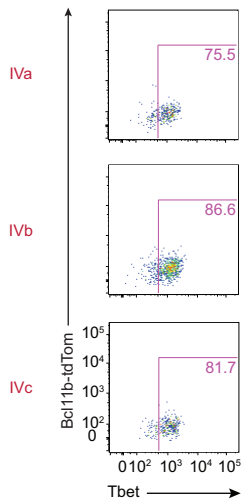

B

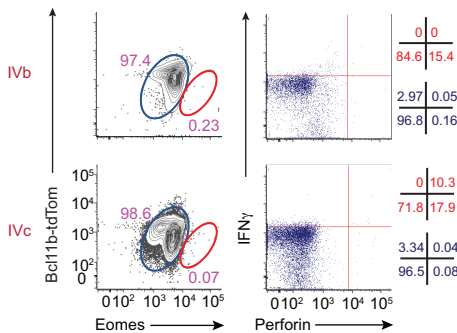

Figure S7

A

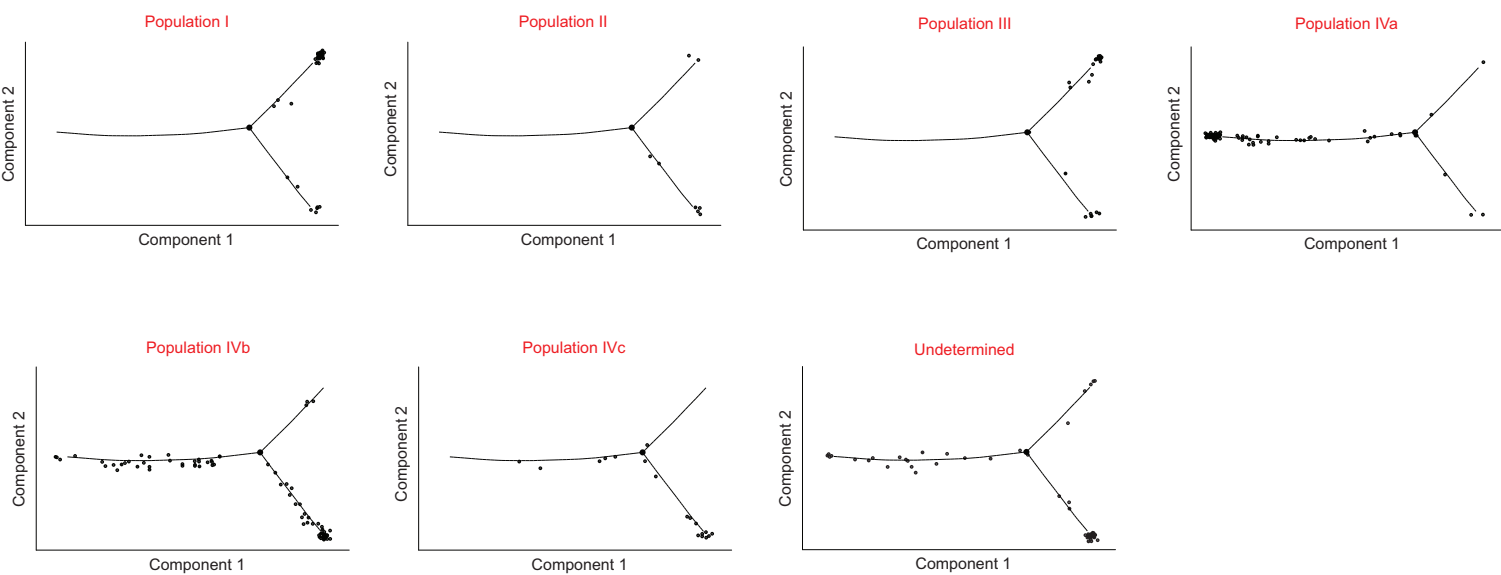

B

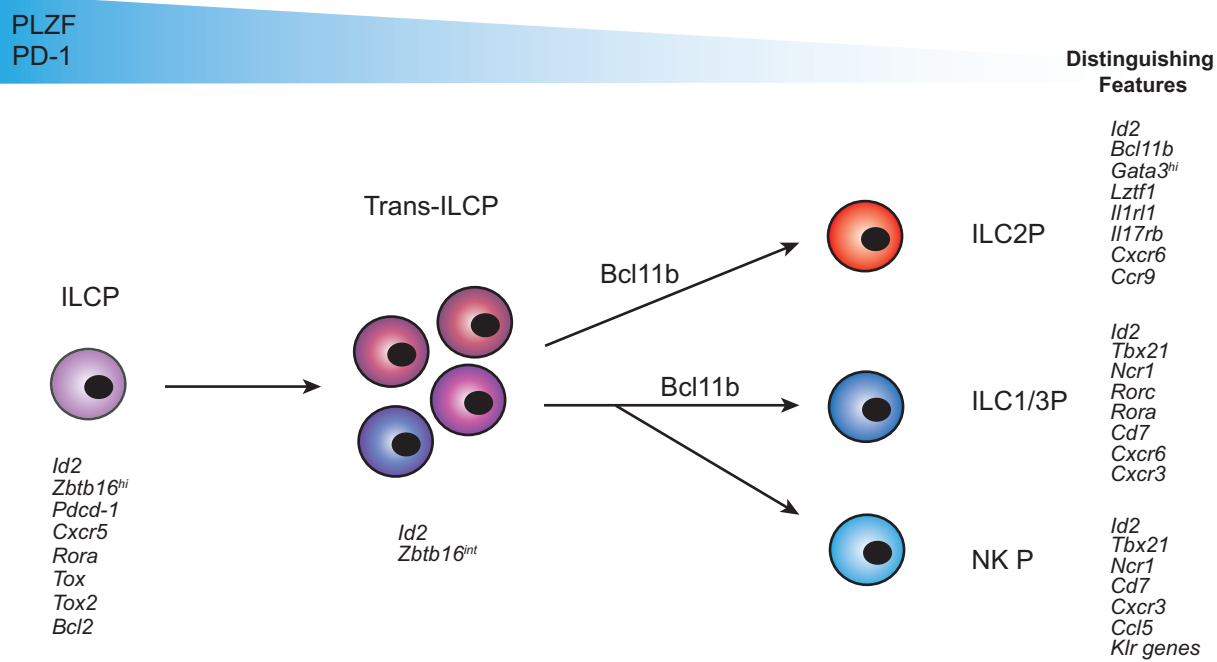

**Table S1. ILC progenitor nomenclature. Related to Figures 3 and 4.**

| Progenitor population   | Progenitor phenotype                                                                                                                                                          | In vivo progeny           | In vitro progeny                        |
|-------------------------|-------------------------------------------------------------------------------------------------------------------------------------------------------------------------------|---------------------------|-----------------------------------------|
| I                       | Lin <sup>-</sup> IL-7R $\alpha$ <sup>+</sup> Id2 <sup>+</sup> Bcl11b <sup>+</sup> CD25 <sup>+</sup> Gata3 <sup>hi</sup> $\alpha$ 4 $\beta$ 7 <sup>int</sup>                   | ILC2                      | ILC2                                    |
| II                      | Lin <sup>-</sup> IL-7R $\alpha$ <sup>+</sup> Id2 <sup>+</sup> Bcl11b <sup>+</sup> CD25 <sup>-</sup> Gata3 <sup>lo</sup> $\alpha$ 4 $\beta$ 7 <sup>lo</sup>                    | ILC2                      | ILC2                                    |
| III-lo                  | Lin <sup>-</sup> IL-7R $\alpha$ <sup>+</sup> Id2 <sup>+</sup> Bcl11b <sup>+</sup> CD25 <sup>-</sup> Gata3 <sup>lo</sup> $\alpha$ 4 $\beta$ 7 <sup>lo</sup>                    | NK + ILC2 (few ILC1/ILC2) | ILC1, ILC2, ILC3                        |
| III-hi                  | Lin <sup>-</sup> IL-7R $\alpha$ <sup>+</sup> Id2 <sup>+</sup> Bcl11b <sup>+</sup> CD25 <sup>-</sup> Gata3 <sup>hi</sup> $\alpha$ 4 $\beta$ 7 <sup>int</sup>                   | ILC2                      | ILC2                                    |
| III-lo-kat <sup>+</sup> | Lin <sup>-</sup> IL-7R $\alpha$ <sup>+</sup> Id2 <sup>+</sup> Bcl11b <sup>+</sup> CD25 <sup>-</sup> Gata3 <sup>lo</sup> $\alpha$ 4 $\beta$ 7 <sup>int</sup> Rorc <sup>+</sup> | ILC2 + ILC3               | ILC3                                    |
| IV-lo                   | Lin <sup>-</sup> IL-7R $\alpha$ <sup>+</sup> Id2 <sup>+</sup> Bcl11b <sup>-</sup> CD25 <sup>-</sup> Gata3 <sup>lo</sup> $\alpha$ 4 $\beta$ 7 <sup>mix</sup>                   | NK, ILC1, ILC2, ILC3      | Not done                                |
| IV-hi                   | Lin <sup>-</sup> IL-7R $\alpha$ <sup>+</sup> Id2 <sup>+</sup> Bcl11b <sup>-</sup> CD25 <sup>-</sup> Gata3 <sup>hi</sup> $\alpha$ 4 $\beta$ 7 <sup>mix</sup>                   | ILC2 + ILC3               | Not done                                |
| IVa                     | Lin <sup>-</sup> IL-7R $\alpha$ <sup>+</sup> Id2 <sup>+</sup> Bcl11b <sup>-</sup> CD25 <sup>-</sup> Gata3 <sup>hi</sup> $\alpha$ 4 $\beta$ 7 <sup>hi</sup>                    | NK, ILC1, ILC2, ILC3      | ILC1 + ILC2                             |
| IVb                     | Lin <sup>-</sup> IL-7R $\alpha$ <sup>+</sup> Id2 <sup>+</sup> Bcl11b <sup>-</sup> CD25 <sup>-</sup> Gata3 <sup>hi</sup> $\alpha$ 4 $\beta$ 7 <sup>lo</sup> Rorc <sup>-</sup>  | NK, ILC1, ILC2, ILC3      | ILC1 + ILC2                             |
| IVc                     | Lin <sup>-</sup> IL-7R $\alpha$ <sup>+</sup> Id2 <sup>+</sup> Bcl11b <sup>-</sup> CD25 <sup>-</sup> Gata3 <sup>hi</sup> $\alpha$ 4 $\beta$ 7 <sup>lo</sup> Rorc <sup>+</sup>  | NK, ILC1, ILC2, ILC3      | ILC1, ILC2, ILC3                        |
|                         |                                                                                                                                                                               | <b>PLZF expression</b>    | <b>Chemokine receptors</b>              |
| EILP (a)                | Lin <sup>-</sup> IL-7R $\alpha$ <sup>lo</sup> Thy1 <sup>-</sup> $\alpha$ 4 $\beta$ 7 <sup>+</sup> Kit <sup>+</sup> CD122 <sup>lo</sup> TCF7 <sup>+</sup>                      | PLZF <sup>int</sup>       |                                         |
| $\alpha$ LP (b)         | Lin <sup>-</sup> IL-7R $\alpha$ <sup>+</sup> Id2 <sup>+</sup> CD25 <sup>-</sup> $\alpha$ 4 $\beta$ 7 <sup>+</sup> Flt3 <sup>-</sup> Kit <sup>int</sup> Sca1 <sup>int</sup>    | PLZF <sup>+/-</sup>       | CXCR6 <sup>+/-</sup>                    |
| CHILP (c)               | Lin <sup>-</sup> IL-7R $\alpha$ <sup>+</sup> Id2 <sup>+</sup> CD25 <sup>-</sup> $\alpha$ 4 $\beta$ 7 <sup>hi</sup> Flt3 <sup>-</sup>                                          | PLZF <sup>+/-</sup>       |                                         |
| ILCP (a)                | Lin <sup>-</sup> IL-7R $\alpha$ <sup>+</sup> Thy1 <sup>+</sup> $\alpha$ 4 $\beta$ 7 <sup>hi</sup> Flt3 <sup>-</sup> Kit <sup>+</sup> CD122 <sup>lo</sup> TCF7 <sup>+</sup>    | PLZF <sup>hi</sup>        | CXCR5 <sup>+</sup> , CXCR6 <sup>+</sup> |

(a) (Harly et al., 2018) (b) (Seillet et al., 2016) (c) (Klose et al., 2014)
