# Supplementary material for: Polychromic Reporter Mice Reveal Unappreciated Innate Lymphoid Cell Progenitor Heterogeneity and Elusive ILC3 Progenitors in Bone Marrow
Source: PubMed Central journal article supplement (PMC6642165; doi:10.1016/j.immuni.2019.05.002), 2019-07-16
Supplement: mmc2.pdf [file mmc2.pdf]

## Polychromic Reporter Mice Reveal Unappreciated Innate Lymphoid Cell Progenitor Heterogeneity and Elusive ILC3 Progenitors in Bone Marrow

### Highlights

- Five-color “polychromILC” transcription factor reporter mice define ILC precursors
- ILC precursors give rise to ILC1, ILC2, and ILC3 and retain NK potential
- A *Rorc*<sup>Kat</sup> allele allows resolution of extremely rare ILC3 progenitors
- Detection of divergent trajectories for ILC2 and common ILC1, ILC3, and NK development

### Authors

Jennifer A. Walker, Paula A. Clark, Alastair Crisp, ..., Liora Haim-Vilmovsky, Sarah A. Teichmann, Andrew N.J. McKenzie

### Correspondence

anm@mrc-lmb.cam.ac.uk

### In Brief

Innate lymphoid cells (ILCs) play strategic roles in tissue homeostasis and immunity. Walker et al. demonstrate via five-reporter polychrome mice the distinct divergence of ILC2 development from common ILC1, ILC3, and NK progenitors.

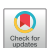

# Polychromic Reporter Mice Reveal Unappreciated Innate Lymphoid Cell Progenitor Heterogeneity and Elusive ILC3 Progenitors in Bone Marrow

Jennifer A. Walker,<sup>1</sup> Paula A. Clark,<sup>1</sup> Alastair Crisp,<sup>1</sup> Jillian L. Barlow,<sup>1</sup> Aydan Szeto,<sup>1</sup> Ana C.F. Ferreira,<sup>1</sup> Batika M.J. Rana,<sup>1</sup> Helen E. Jolin,<sup>1</sup> Noe Rodriguez-Rodriguez,<sup>1</sup> Meera Sivasubramaniam,<sup>1</sup> Richard Pannell,<sup>1</sup> James Cruickshank,<sup>1</sup> Maria Daly,<sup>1</sup> Liora Haim-Vilmovsky,<sup>2</sup> Sarah A. Teichmann,<sup>2,3</sup> and Andrew N.J. McKenzie<sup>1,4,\*</sup>

<sup>1</sup>MRC Laboratory of Molecular Biology, Cambridge, CB2 0QH, United Kingdom

<sup>2</sup>Wellcome Trust Sanger Institute, Wellcome Trust Genome Campus, Hinxton, CB10 1SA UK

<sup>3</sup>Theory of Condensed Matter, Cavendish Laboratory, Department of Physics, University of Cambridge, Cambridge, UK; European Molecular Biology Laboratory, European Bioinformatics Institute (EMBL-EBI), Wellcome Genome Campus, Hinxton, UK

<sup>4</sup>Lead Contact

\*Correspondence: [anm@mrc-lmb.cam.ac.uk](mailto:anm@mrc-lmb.cam.ac.uk)  
<https://doi.org/10.1016/j.immuni.2019.05.002>

## SUMMARY

Innate lymphoid cells (ILCs) play strategic roles in tissue homeostasis and immunity. ILCs arise from lymphoid progenitors undergoing lineage restriction and the development of specialized ILC subsets. We generated “5x polychromILC” transcription factor reporter mice to delineate ILC precursor states by revealing the multifaceted expression of key ILC-associated transcription factors (Id2, Bcl11b, Gata3, ROR $\gamma$ t, and ROR $\alpha$ ) during ILC development in the bone marrow. This approach allowed previously unattained enrichment of rare progenitor subsets and revealed hitherto unappreciated ILC precursor heterogeneity. *In vivo* and *in vitro* assays identified precursors with potential to generate all ILC subsets and natural killer (NK) cells, and also permitted discrimination of elusive ILC3 bone marrow antecedents. Single-cell gene expression analysis identified a discrete ILC2-committed population and delineated transition states between early progenitors and a highly heterogeneous ILC1, ILC3, and NK precursor cell cluster. This diversity might facilitate greater lineage potential upon progenitor recruitment to peripheral tissues.

## INTRODUCTION

Innate lymphoid cells (ILCs) play roles in homeostasis and responses to injury and infection (Colonna, 2018; Eberl et al., 2015; Vivier et al., 2018). ILC subtypes can react rapidly *in situ* to tissue-associated microenvironmental cues, such as those released upon perturbation of mucosal barrier surfaces. The ILC subgroups mirror T helper subsets based on their principal transcription factor (TF) expression and predominant cytokine secretion: ILC1s express T-bet (encoded by *Tbx21*) and produce IFN- $\gamma$ ; ILC2s express high amounts of Gata3 (en-

coded by *Gata3*) and secrete IL-5 and IL-13; whereas ILC3s express Retinoic-acid-receptor-related orphan nuclear receptor  $\gamma$  (ROR $\gamma$ t) (encoded by *Rorc*) and produce IL-17 and IL-22 (Colonna, 2018; Vivier et al., 2018). Furthermore, the previously defined IFN- $\gamma$ -producing natural killer (NK) cells are closely related to ILC1s but require the TF Eomes for their development, and have profound cytolytic activity (Colonna, 2018; Vivier et al., 2018). ILC1 and NK cells share several surface markers, such as NK1.1 and NKp46. NK subpopulations can also vary within and between tissues, and their classification with regard to ILC1 can prove challenging. It has been suggested that ILC1s, ILC2s, and ILC3s are the innate counterparts of CD4<sup>+</sup> T cells, whereas NKs are the innate manifestation of cytolytic CD8<sup>+</sup> T cells.

The similarities with T cells also extend to the plasticity of ILC subsets (Colonna, 2018; Vivier et al., 2018). Thus, depending on tissue microenvironment and inflammatory context, a fraction of ILCs can modulate their cytokine secretion after the differential expression of cytokine-regulating TFs. It has been reported that, in humans, circulating ILC progenitors represent a pool of uncommitted cells with the capacity to acquire the requisite TF and cytokine profiles as they mature in the tissue (Lim et al., 2017). However, defined ILC progenitors can develop in the bone marrow, and circulating naive ILC subsets have also been reported (Krabbendam et al., 2018; Mjösberg and Spits, 2016).

ILC and NK development has been studied extensively in mice (Cherrier et al., 2018; Constantinides et al., 2014; Eberl et al., 2004; Ishizuka et al., 2016; Klose et al., 2014; Wong et al., 2012; Yu et al., 2014; Yu et al., 2016). ILC and NK differentiation requires the expression of inhibitor of DNA binding 2 (Id2) to repress E-box proteins that would otherwise result in T or B cell commitment from common lymphoid progenitors (CLPs). Current models for the differentiation of ILCs from CLPs have suggested a progression of ever more restricted progenitors defined by their cell surface marker and TF expression. However, there is considerable overlap in the phenotypes of these proposed progenitor populations. The earliest ILC progenitors have been defined by the expression of T cell factor 1 (TCF1), TOX, nuclear factor interleukin 3 regulated (NFIL3),

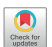

alpha4beta7 integrin ( $\alpha 4\beta 7$ ), and Gata3; the early innate lymphoid progenitor (EILP) expresses little or no Id2 or interleukin-7 receptor  $\alpha$  (IL-7R $\alpha$ ) (Harly et al., 2018; Yang et al., 2015), and the  $\alpha$ -lymphoid precursor ( $\alpha$ LP) is Id2<sup>+</sup> and IL-7R $\alpha$ <sup>+</sup> (Yu et al., 2014). EILP and  $\alpha$ LP can give rise to NK cells and ILCs. Downstream of these, and reportedly associated with the loss of NK potential, is the common helper-like innate lymphoid progenitor (CHILP) (lineage<sup>-</sup>Id2<sup>hi</sup>IL-7R $\alpha$ <sup>+</sup>Id2<sup>+</sup>Flt3<sup>-</sup> $\alpha 4\beta 7$ <sup>hi</sup>PLZF<sup>+/-</sup>) (Klose et al., 2014) that gives rise to lymphoid tissue inducer (LTI) cells, and the more restricted common ILC progenitor (CILP or ILCP) (lineage<sup>-</sup>Id2<sup>hi</sup>IL-7R $\alpha$ <sup>+</sup>Flt3<sup>-</sup> $\alpha 4\beta 7$ <sup>hi</sup>PLZF<sup>+</sup>) that produces cells committed to one of the “helper” ILC subsets ILC1, ILC2, and ILC3 (Constantinides et al., 2014; Klose et al., 2014). In addition, gene expression analysis of these proposed progenitors indicates that programmed cell death protein-1 (PD-1) is expressed specifically by promyelocytic leukemia zinc finger (PLZF)<sup>+</sup> ILCP (Seillet et al., 2016), and is a marker of committed ILC progenitors (Yu et al., 2016), but is not essential for ILC development (Seillet et al., 2016). By contrast, several factors have been demonstrated to play roles during the multipotent phases of ILC commitment (Cherrier et al., 2018; Cherrier et al., 2012; Harly et al., 2018; Klose et al., 2014; Lee et al., 2011; Yu et al., 2014; Zhu, 2017), whereas others appear preferentially important for the development of specific ILC subsets, for example the ILC2 progenitor (ILC2P) requires RAR-related orphan receptor  $\alpha$  (ROR $\alpha$ ) (Halim et al., 2012; Wong et al., 2012) and Bcl11b (Califano et al., 2015; Walker et al., 2015; Yu et al., 2015) for its development.

Progress in this area requires the identification, isolation, and characterization of developmental intermediates in order to ascertain their lineage potential and gene expression state. Identification of transitional states is challenging due to the restricted repertoire of cell surface molecules and lack of characteristic markers. Thus, to define intermediate ILC developmental states during lineage segregation in a physiological context, we generated and inter-crossed reporter mouse strains that allow the simultaneous delineation of five key ILC transcription factors, Id2, Bcl11b, Gata3, ROR $\alpha$ , and ROR $\gamma$ t, in combination with cell surface markers. This approach revealed highly heterogeneous ILC progenitors and allowed for the unprecedented enrichment of specific TF-defined ILCs to facilitate single-cell transcriptomic analysis, leading us to re-evaluate the existing models for ILC differentiation in bone marrow.

## RESULTS

### Generation of Compound Transcription Factor Reporter Mice to Define ILC Lineage Development

To facilitate the identification and isolation of ILC progenitor populations, we generated four reporter mouse strains to trace the expression of the key ILC-associated transcription factors: Id2, Gata3, ROR $\alpha$ , and ROR $\gamma$ t. Spectrally compatible reporter proteins were selected to enable the generation of compound reporter mice. With the exception of the *Rorc* allele, in which the gene-encoding Katushka (Kat) fluorescent protein was targeted to the translation initiation site for *Rorc* to ensure specificity for the ROR $\gamma$ t isoform (Rorc-Kat protein, *Rorc*<sup>Kat</sup> allele) (Figures

S1A and S1B), all other TF reporter alleles comprised a short C-terminal epitope tag, followed by a reporter protein cloned downstream of a T2A self-cleaving peptide. This ensured that the reporter protein was produced stoichiometrically with the endogenous TF: Id2-Blue fluorescent protein (*Id2*<sup>BFP</sup> allele) (Figures S2A and S2B), Gata3-human CD2 (hCD2) (*Gata3*<sup>hCD2</sup> allele) (Figures S3A and S3B), and Rora-Teal fluorescent protein (*Rora*<sup>Teal</sup> allele) (Figures S4A and S4B).

Rorc-Kat was expressed in LTI cells, NKp46<sup>+</sup>NK1.1<sup>-</sup> ILC3s and the majority of NKp46<sup>+</sup>NK1.1<sup>+</sup> ILCs, representing “ILC1 or ex-ILC3” (Figures 1A and 1B). ILC2 did not express Rorc-Kat (Figures 1A and 1B). As described previously for *Rorc*<sup>GFP/GFP</sup> mice (Eberl et al., 2004), homozygous *Rorc*<sup>Kat/Kat</sup> mice (which no longer express ROR $\gamma$ t) were devoid of peripheral lymph nodes and Peyer’s patches (data not shown) lacked ILC3 and LTI cells (Figure S1C) and exhibited impaired T cell differentiation consistent with *Rorc* expression in double-positive thymocytes (Figures S1D–S1F). *Rorc*<sup>+Kat</sup> mice had an increased frequency of NKp46<sup>+</sup>NK1.1<sup>+</sup> “ILC1 or ex-ILC3” cells in small intestine lamina propria (siLP), consistent with the reported role for ROR $\gamma$ t in regulating the balance between ILC3 and ex-ILC3 subsets (Vonnarbourg et al., 2010) (Figure S1C). A small Rorc-Kat<sup>-</sup> cell subset was also present in the NKp46<sup>+</sup>NK1.1<sup>+</sup> gate, presumably representing ILC1s or ex-ILC3s (Figure S1G). Analysis of the analogous NKp46<sup>+</sup>NK1.1<sup>+</sup> cell compartment in *Rorc*<sup>Kat/Kat</sup> mice highlighted the presence of Rorc-Kat<sup>+</sup> cells, which might represent ILC1s in which the *Rorc* locus is being transcribed, but from which functional ROR $\gamma$ t protein cannot be produced (Figure S1G).

Phenotypic analysis of the individual *Id2*<sup>BFP</sup>, *Gata3*<sup>hCD2</sup>, and *Rora*<sup>Teal</sup> strains revealed minimal perturbation to hematopoietic cell populations (Figures 1A and S2–S4). Consistent with previous reports of *Id2* reporter strains (Jackson et al., 2011; Klose et al., 2014), *Id2*-BFP expression was observed in all mature ILC subsets, LTI cells, and NK cells (Figures 1C and S2C), and gene targeting had no discernible effect on the frequency of the leukocyte populations analyzed (Figures S2D–S2F). *Gata3*-hCD2 expression was observed in all ILC subsets, being highest in ILC2, and intermediate in all other subsets, consistent with previous reports (Moro et al., 2010; Price et al., 2010; Serafini et al., 2014; Yagi et al., 2014) (Figures 1D and S3C). Analysis of *Gata3*<sup>+hCD2</sup> and *Gata3*<sup>hCD2/hCD2</sup> mice indicated little effect on ILC2 frequency or cytokine production after IL-33 challenge (Figures S3D and S3E). All other lymphoid populations examined were unaffected with the exception of a modest increase in the frequency of siLP ILC2s in *Gata3*<sup>hCD2/hCD2</sup> mice (Figures S3F–S3I).

As anticipated from the critical role for ROR $\alpha$  in ILC2 development (Halim et al., 2012; Wong et al., 2012), *Rora*-Teal was expressed in mature ILC2s and committed bone marrow ILC2Ps (Figures 1E, S4C, and S4D). Although *Rora* gene targeting had no discernible effect on the frequency of mature ILC2s in naive mice, or the expansion and cytokine production of ILC2s upon IL-33 stimulation *in vivo* (Figures S4E–S4G), we noted a reduction in ILC2Ps in *Rora*<sup>Teal/Teal</sup> mice (Figure S4H), but not in the frequency of CLPs or CHILPs (data not shown). ILC populations in siLP were unperturbed in *Rora*<sup>Teal/Teal</sup> mice with the exception of ILC3s, which showed a modest skewing toward an NK1.1<sup>+</sup> “ILC1 or ex-ILC3” phenotype (Figure S4I). All

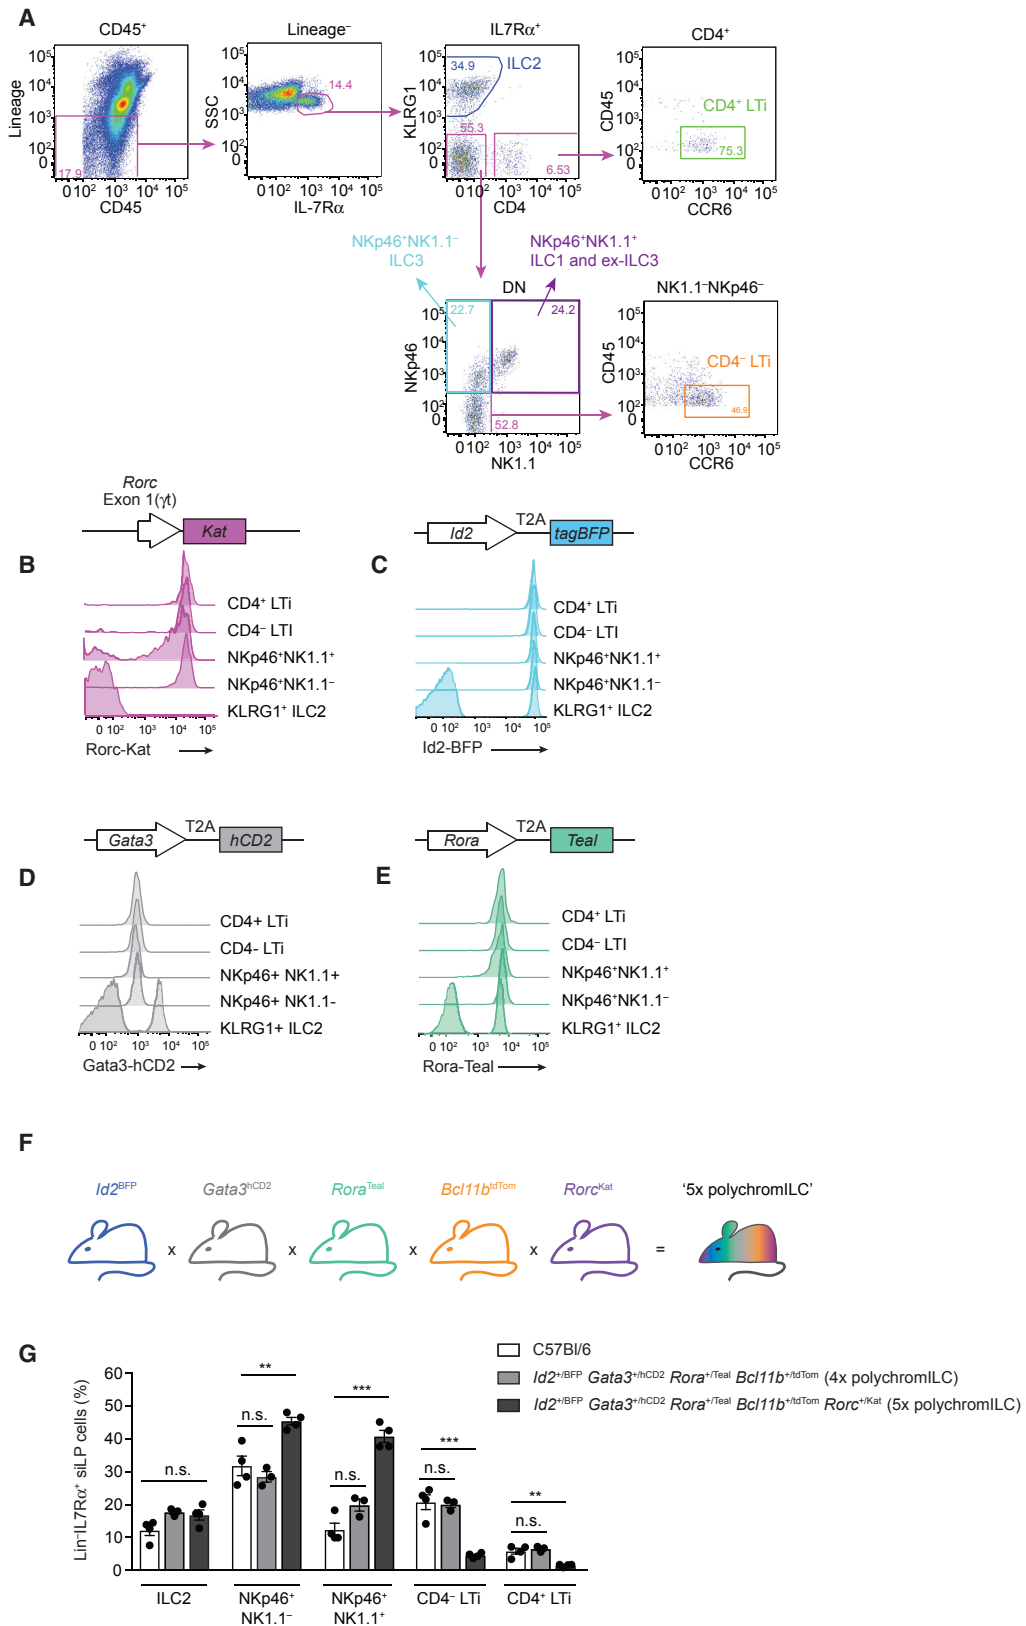

(legend on next page)

other lymphocyte populations analyzed were normal (Figure S4J).

To analyze ILC progenitors, we inter-crossed the four individual TF reporter mouse strains and additionally incorporated a Bcl11b-tdTomato reporter mouse (Bcl11b-tdTom protein, *Bcl11b*<sup>tdTom</sup> allele), an important determinant of ILC2 transcriptional programs (Walker et al., 2015; Yu et al., 2015) (Figure 1F). To minimize the influence of altering gene expression through gene targeting, we analyzed compound heterozygotes. Analysis of individual ILC populations from *Id2*<sup>+/-BFP</sup>*Gata3*<sup>+/-hCD2</sup>*Rora*<sup>+/-Teal</sup>*Bcl11b*<sup>+/-tdTom</sup> mice indicated that ILC development was unperturbed (Figure 1G). Introduction of the *Rorc*<sup>+/-Kat</sup> allele to give *Id2*<sup>+/-BFP</sup>*Gata3*<sup>+/-hCD2</sup>*Rora*<sup>+/-Teal</sup>*Bcl11b*<sup>+/-tdTom</sup>*Rorc*<sup>+/-Kat</sup> “5x polychromILC” mice revealed a modest increase in the frequency of the NKp46<sup>+</sup>NK1.1<sup>+</sup> and NKp46<sup>+</sup>NK1.1<sup>-</sup> ILC subsets and a reduction in LTi cells (Figure 1G).

Thus, we have generated a panel of individual ILC-associated TF reporter mice that can be intercrossed to produce a combinatorial 5x polychromILC strain for analysis of ILC progenitor development. These mice allow for the specific isolation of viable TF<sup>+</sup> cell subsets that constitute an extremely minor proportion of bone marrow hematopoietic cells and that can be further analyzed by using *in vitro* assays, *in vivo* adoptive transfers, and single-cell gene expression profiling.

### Rora-Teal Expression Distinguishes between ILCs and NK Cells

Rora-Teal in the context of the 5x polychromILC mice revealed that Rora is highly expressed in all ILC populations (data not shown), including siLP Rorc-Kat<sup>-</sup> ILC1s or ex-ILC3 cells, but not NK cells (Figures 2A and 2B). To establish whether Rora-Teal expression discriminated ILCs from NK cells, we characterized its expression in NK and ILC1s in spleen, liver, and siLP (Figure 2C), as defined previously (Robinette et al., 2015; Weizman et al., 2017). In all tissues, Rora-Teal correlated positively with the ILC1-associated markers CD200R, CD61, IL-7R $\alpha$ , and CD49a, and negatively with the NK-cell-associated markers CD49b, CD62L, and CD11b (Figure 2C), confirming that Rora-Teal was ILC1 restricted. Furthermore ROR $\alpha$ -expressing cells were also T-bet<sup>+</sup> and Eomes<sup>-</sup>, consistent with their classification as ILC1s (Figures 2D–2F and S4K). A third group of IL-7R $\alpha$ <sup>-</sup> cells was ROR $\alpha$ <sup>-</sup> and showed a hybrid phenotype that varied considerably between tissues, similar to CD11c<sup>+</sup> IFN $\gamma$ -producing NK cells reported previously in the liver after infection (Burt et al., 2008).

### Adoptive Transfer of 5x-polychromILC-Derived Bone Marrow Cells Identifies Heterogeneous Multipotent ILC Progenitors

As reported previously, Bcl11b expression in the lineage<sup>-</sup>Id2<sup>+</sup> subset of bone marrow cells defines a population of ILC2-committed cells (Walker et al., 2015). Using the 5x polychromILC mice, we purified specific progenitor populations on the basis of defined TF reporters and characteristic cell surface receptors. We excluded cells expressing lineage markers (Lin<sup>-</sup>) (see Method Details), then gated for IL-7R $\alpha$ <sup>+</sup>Id2-BFP<sup>+</sup> cells, before delineating four populations on the basis of CD25 and Bcl11b-tdTom expression (Figure 3A). The Gata3<sup>hi</sup> population I (PopI) (Id2<sup>+</sup>Bcl11b<sup>+</sup>CD25<sup>+</sup>) when transferred into sub-lethally irradiated *Rag2*<sup>-/-</sup>*Il2rgc*<sup>-/-</sup> mice gave rise exclusively to ILC2 progeny (Figures 3B–3D). Thus, ILC2 potential correlated with acquisition of CD25 and Bcl11b<sup>+</sup>. However, there were smaller cell populations within the Lin<sup>-</sup>Id2<sup>+</sup> subset that expressed only one, or neither, of these markers (Figure 3A). We analyzed their expression of additional TFs, defined by 5x polychromILC mice, and expression of  $\alpha$ 4 $\beta$ 7, which has been reported previously to identify a CHILP (Lin<sup>-</sup>IL-7R $\alpha$ <sup>+</sup>Id2<sup>+</sup>Fit3<sup>-</sup> $\alpha$ 4 $\beta$ 7<sup>hi</sup>) from which NK cells were not derived (Klose et al., 2014). PopII (Id2<sup>+</sup>Bcl11b<sup>-</sup>CD25<sup>+</sup>) was also Gata3<sup>hi</sup> and  $\alpha$ 4 $\beta$ 7<sup>int</sup> (Figure 3B) and, like PopI, only gave rise to ILC2 progeny upon transfer into *Rag2*<sup>-/-</sup>*Il2rgc*<sup>-/-</sup> recipients (Figures 3C and 3D), despite their lack of expression of the Bcl11b-tdTom reporter. Although it is possible that these cells were truly Bcl11b<sup>-</sup>, it is also feasible that they expressed only the non-reporter allele of *Bcl11b* as a result of the stochastic nature of Bcl11b expression as reported during T cell development (Ng et al., 2018). Following adoptive transfer, around 50% of the progeny of PopII upregulated tdTomato expression, suggesting that this “window” for *Bcl11b* allele activation remained open at the CD25<sup>+</sup> ILC2P stage of ILC differentiation (Figure 3E and data not shown). Notably, subsets that already expressed the Bcl11b reporter allele did not subsequently switch this off, and progeny of *Bcl11b*-tdTom<sup>+</sup> cells remained tdTomato<sup>+</sup>.

Among Bcl11b-tdTom<sup>+</sup> cells, there was also a population that was CD25<sup>-</sup>. PopIII (Id2<sup>+</sup>Bcl11b<sup>+</sup>CD25<sup>-</sup>) could be subdivided into a Gata3<sup>hi</sup> $\alpha$ 4 $\beta$ 7<sup>int</sup> subset (III<sup>hi</sup>) and a Gata3<sup>lo</sup> $\alpha$ 4 $\beta$ 7<sup>lo</sup> subset (III<sup>lo</sup>) (Figures 3A and 3B). When transferred into recipients, PopIII<sup>hi</sup> was ILC2 restricted (Figure 3D). However, PopIII<sup>lo</sup> produced mixed progeny including NK cells (defined as NKp46<sup>+</sup>NK1.1<sup>+</sup>ROR $\gamma$ <sup>+</sup>Gata3<sup>lo</sup>ROR $\alpha$ <sup>-</sup>) (Figure 3C), ILC2s, and small numbers of ILC1s and ILC3s (Figure 3D). Thus, despite expressing Bcl11b, these cells were not uniformly ILC2-committed and

### Figure 1. Generation of Compound 5x polychromILC TF Reporter Mice to Define ILC Lineage Development

- (A) Flow-cytometry gating strategy for ILC subsets in siLP from TF reporter mice (ILC1 or ex-ILC3: CD45<sup>+</sup>Lin<sup>-</sup>IL-7R $\alpha$ <sup>+</sup>CD4<sup>-</sup>KLRG1<sup>-</sup>NKp46<sup>+</sup>NK1.1<sup>+</sup>; ILC2: CD45<sup>+</sup>Lin<sup>-</sup>IL-7R $\alpha$ <sup>+</sup>CD4<sup>-</sup>KLRG1<sup>+</sup>; ILC3: CD45<sup>+</sup>Lin<sup>-</sup>IL-7R $\alpha$ <sup>+</sup>CD4<sup>-</sup>KLRG1<sup>-</sup>NKp46<sup>+</sup>NK1.1<sup>-</sup>; CD4<sup>-</sup>LTi: CD45<sup>lo</sup>Lin<sup>-</sup>IL-7R $\alpha$ <sup>+</sup>CD4<sup>-</sup>KLRG1<sup>-</sup>NKp46<sup>-</sup>NK1.1<sup>-</sup>CCR6<sup>+</sup>; CD4<sup>+</sup>LTi: CD45<sup>lo</sup>Lin<sup>-</sup>IL-7R $\alpha$ <sup>+</sup>KLRG1<sup>-</sup>CD4<sup>+</sup>CCR6<sup>+</sup>).
- (B) Flow-cytometry analysis of Rorc-Kat expression in the ILC subsets of the siLP of *Rorc*<sup>+/-Kat</sup> mice.
- (C) Flow-cytometry analysis of Id2-BFP expression in the ILC subsets of the siLP of *Id2*<sup>+/-BFP</sup> mice.
- (D) Flow-cytometry analysis of Gata3-hCD2 expression in the ILC subsets of the siLP of *Gata3*<sup>+/-hCD2</sup> mice.
- (E) Flow-cytometry analysis of Rora-Teal expression in the ILC subsets of the siLP of *Rora*<sup>+/-Teal</sup> mice.
- (F) Schematic for generation of *Id2*<sup>+/-BFP</sup>*Gata3*<sup>+/-hCD2</sup>*Rora*<sup>+/-Teal</sup>*Bcl11b*<sup>+/-tdTom</sup>*Rorc*<sup>+/-Kat</sup> 5x polychromILC mice.
- (G) Flow-cytometric comparison of the ILC subsets in siLP of *Id2*<sup>+/-BFP</sup>*Gata3*<sup>+/-hCD2</sup>*Rora*<sup>+/-Teal</sup>*Bcl11b*<sup>+/-tdTom</sup> (4x polychromILC) mice and *Id2*<sup>+/-BFP</sup>*Gata3*<sup>+/-hCD2</sup>*Rora*<sup>+/-Teal</sup>*Bcl11b*<sup>+/-tdTom</sup>*Rorc*<sup>+/-Kat</sup> (5x polychromILC) mice.

Data are representative of 2 independent experiments; mean  $\pm$  SEM; not significant (ns), \*p < 0.05, \*\*p < 0.01, \*\*\*p < 0.001; one-way ANOVA with Tukey's post-hoc test. Please also see Figures S1–S4.

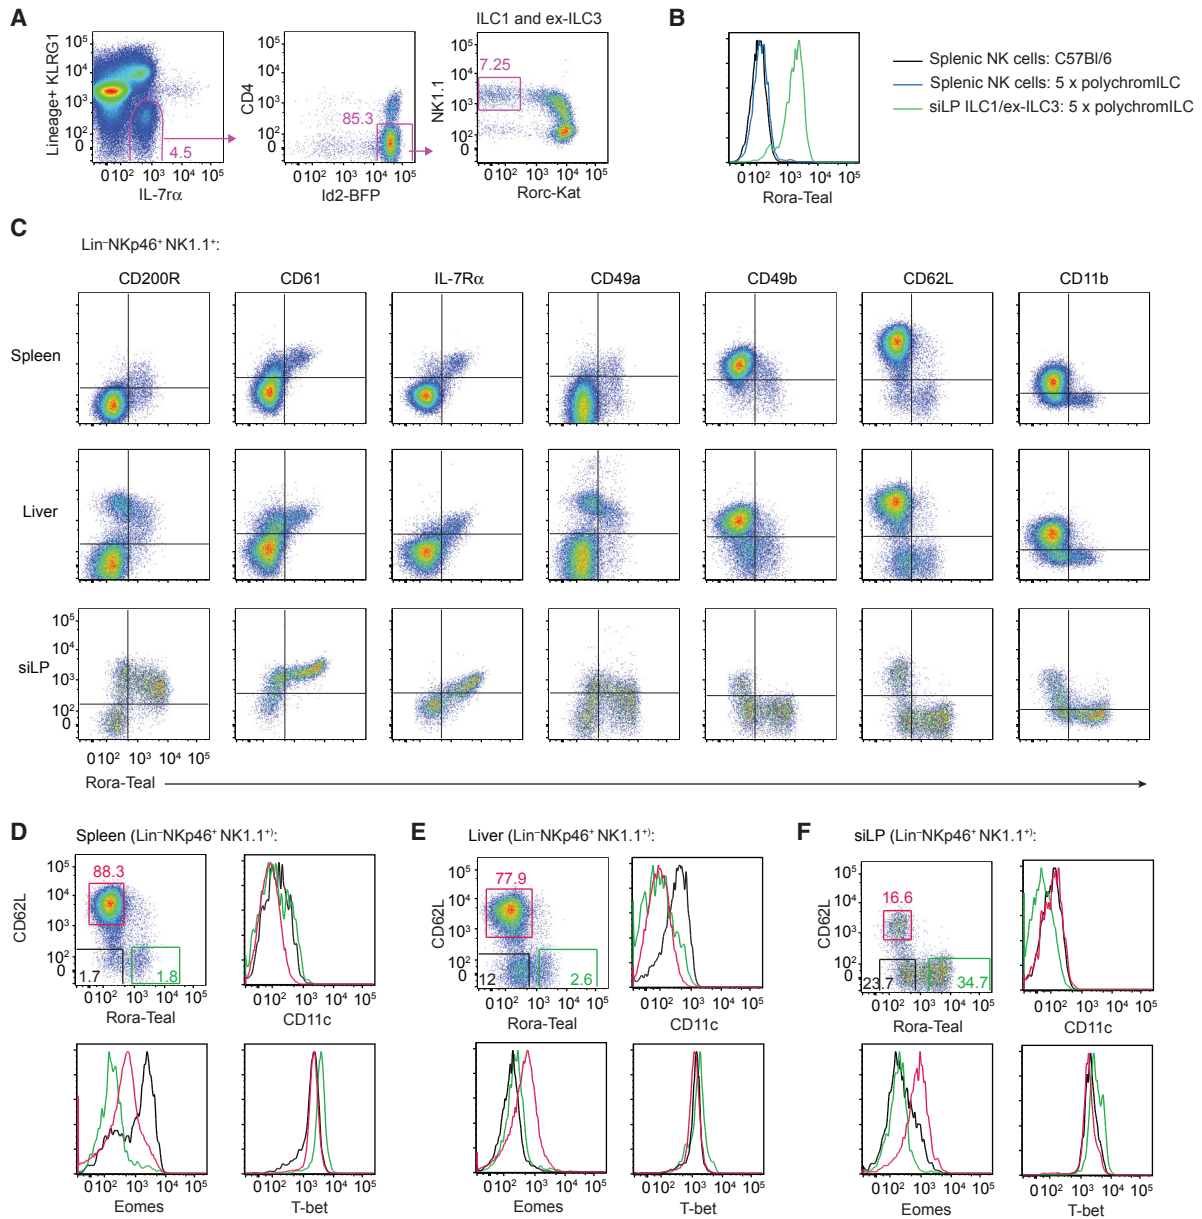

**Figure 2. Rora-Teal Expression Distinguishes ILCs from NK Cells**

(A) Flow-cytometry gating strategy for ILC1 or ex-ILC3 in the siLP of 5x polychromILC mice.  
 (B) Flow-cytometry analysis of Rora-Teal expression in splenic NK cells ( $CD3^{-}CD19^{-}NKp46^{+}NK1.1^{+}$ ) and siLP ILC1 or ex-ILC3 (gated as shown in A) from 5x polychromILC mice.  
 (C) Flow-cytometry analysis of the indicated cell surface markers in  $Lin^{-}NKp46^{+}NK1.1^{+}$  cells from the spleen, liver, and siLP of  $Rora^{+/Teal}$  mice.  
 (D) Flow-cytometry analysis of CD11c, Eomes, and T-bet expression in NK or ILC1 cells from the spleen of  $Rora^{+/Teal}$  mice.  
 (E) Flow-cytometry analysis of CD11c, Eomes, and T-bet expression in NK or ILC1 cells from the liver of  $Rora^{+/Teal}$  mice.  
 (F) Flow-cytometry analysis of CD11c, Eomes, and T-bet expression in NK or ILC1 cells from the siLP of  $Rora^{+/Teal}$  mice.  
 Data are representative of 2 independent experiments.

appear to represent a multipotent progenitor, or a mixed population of cells committed to various NK and ILC lineages. PopIV ( $Id2^{+}Bcl11b^{-}CD25^{-}$ ) was further divided into a  $Gata3^{hi}\alpha4\beta7^{mix}IV^{hi}$  subpopulation and a  $Gata3^{lo}\alpha4\beta7^{mix}IV^{lo}$  subset (Figure 3B). The adoptive transfer of  $PopIV^{hi}$  generated predominantly ILC2s with a minority of ILC3s, whereas the  $PopIV^{lo}$  produced

mixed progeny constituting ILC2, ILC3, and NK cells and relatively few ILC1s (Figure 3D).

These results indicate that there are two, or potentially three (i.e., PopII), populations of committed ILC2 progenitors in which the expression of  $Bcl11b$  in conjunction with the high expression of  $Gata3$  is associated with ILC2 commitment. When only one of

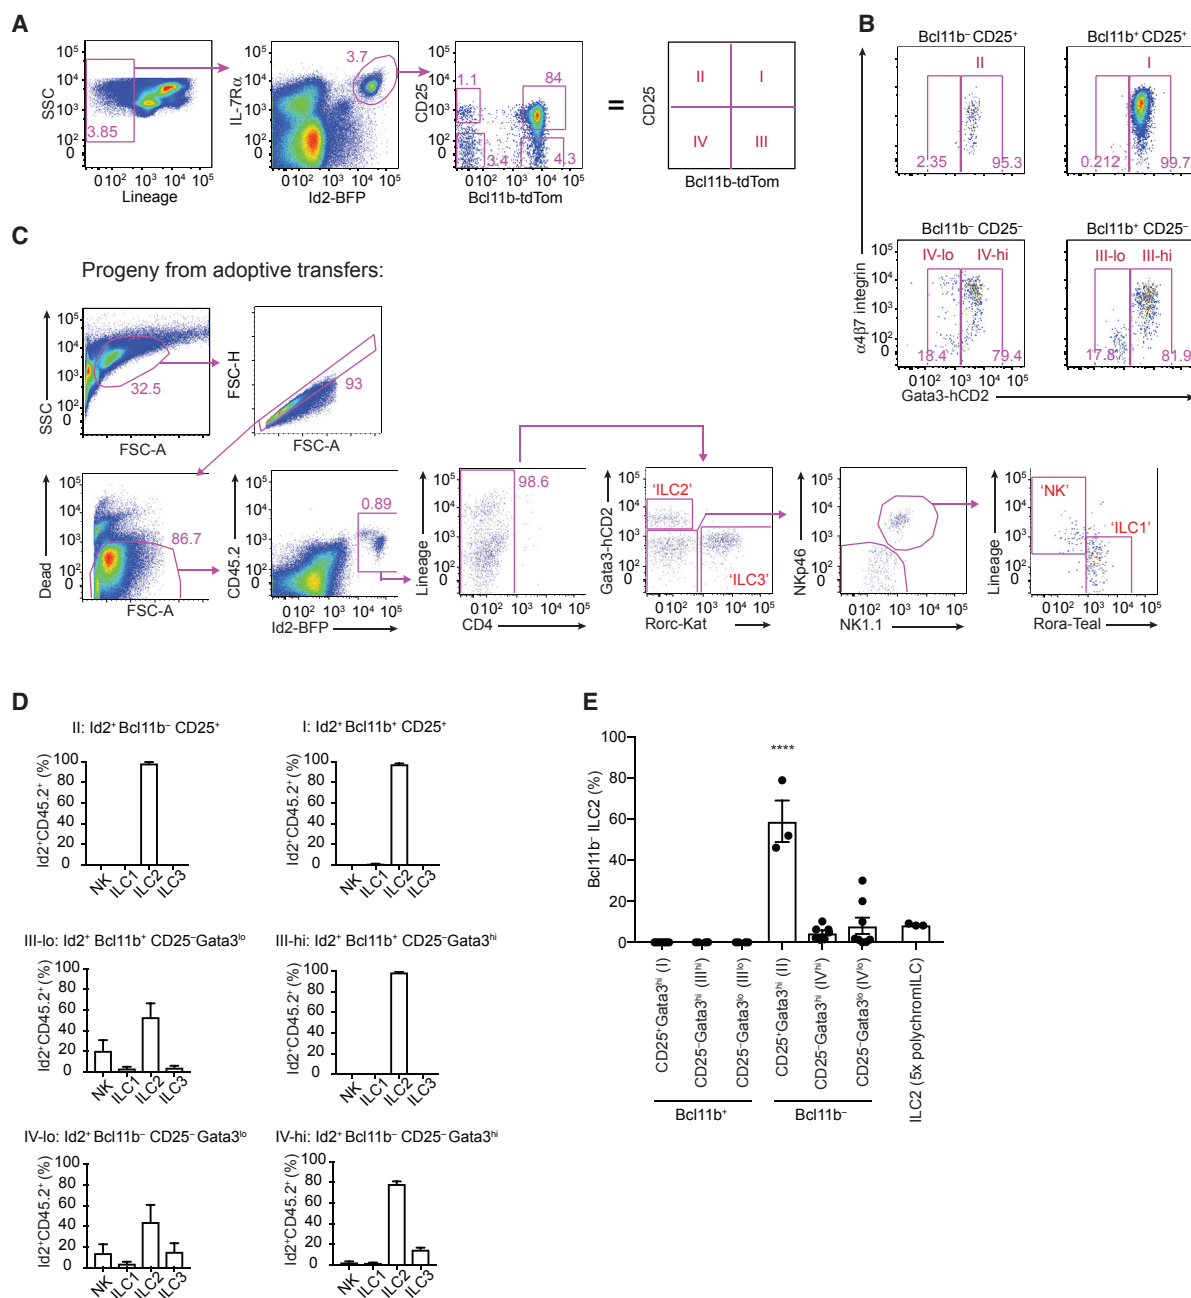

### Figure 3. Identification of Heterogeneous Multipotent ILC Progenitors in the Bone Marrow

(A) Representative flow-cytometry gating strategy for the characterization and purification of ILC progenitor subsets (populations I, II, III<sup>lo</sup>, III<sup>hi</sup>, IV<sup>lo</sup>, and IV<sup>hi</sup>) (see Table S1) from the bone marrow of 5x polychromILC mice.

(B) Flow-cytometry gating strategy for the characterization and purification of ILC progenitor subsets (see A) from the bone marrow of 5x polychromILC mice.

(C) Flow-cytometry gating strategy for ILC subsets in siLP arising from adoptive transfer of bone marrow progenitor populations from 5x polychromILC mice into sublethally irradiated *Rag2*<sup>-/-</sup>*Il2rgc*<sup>-/-</sup> recipients.

(D) Flow-cytometry analysis of the ILC progeny generated *in vivo* after the individual adoptive transfers of progenitor cell populations (see A), purified from the bone marrow of 5x polychromILC mice, into *Rag2*<sup>-/-</sup>*Il2rgc*<sup>-/-</sup> recipients.

(E) Proportion of Bcl11b<sup>-</sup> ILC2 progeny in siLP, derived from the adoptive transfer of purified cell populations (see A) into *Rag2*<sup>-/-</sup>*Il2rgc*<sup>-/-</sup> recipients. Statistical comparison to ILC2s from a 5x polychromILC mouse.

Data are pooled from 2 independent experiments and represent mean  $\pm$  SEM of 3–11 mice per group; \*\*\*\*p < 0.0001 one-way ANOVA with Dunnett's post hoc test.

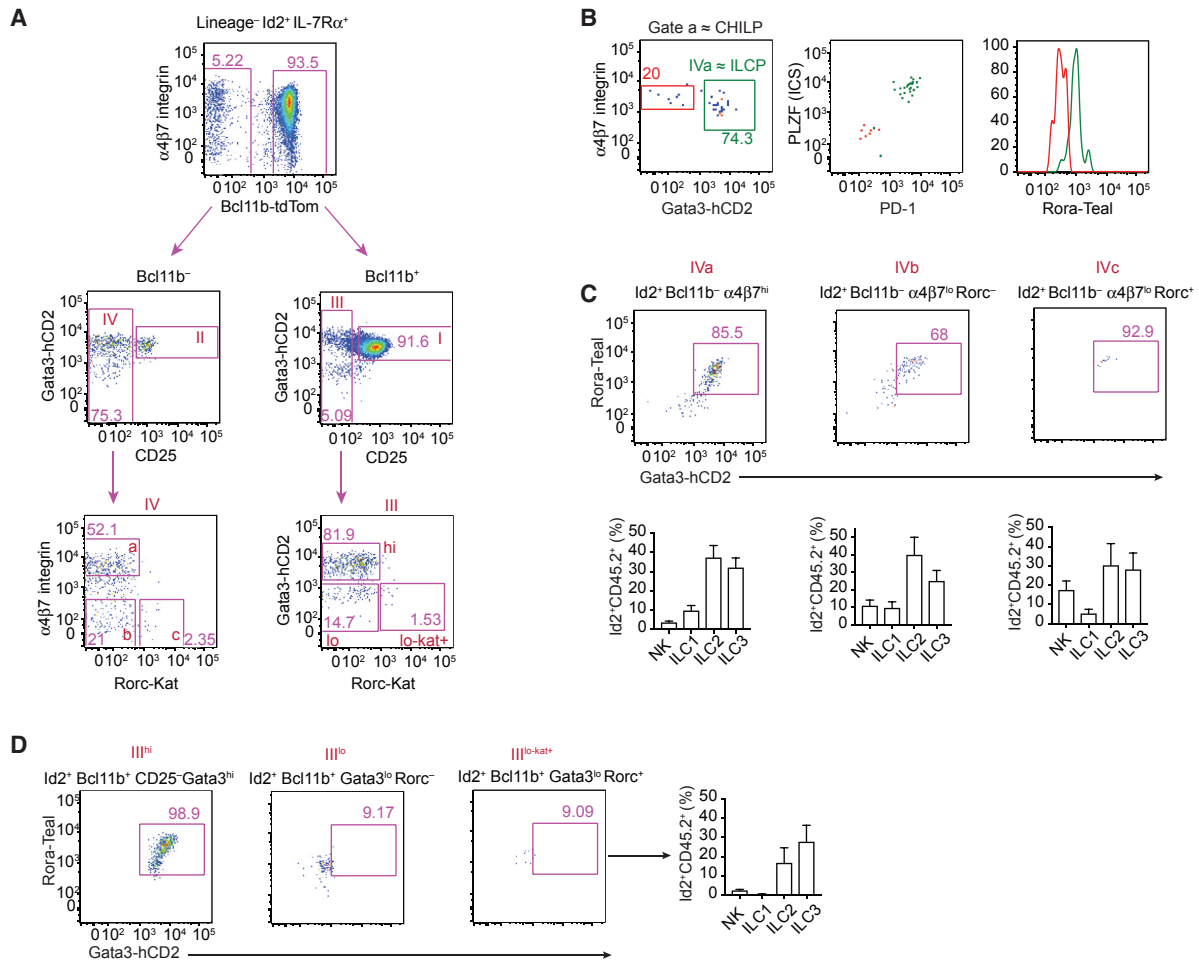

**Figure 4. ILCP-Related Cells Indicate Additional ILC Progenitor Heterogeneity**

(A) Alternative gating strategy for the characterization and purification of populations I, III, and IV from 5x polychromILC bone marrow, to identify Rorc-Kat-positive and -negative progenitors (populations IVa, IVb, IVc, and III<sup>lo-kat+</sup>) (see Table S1).

(B) Flow-cytometry analysis of Gata3-hCD2, α4β7, PD-1, PLZF (intracellular stain [ICS]), and Rora-Teal expression within gate IVa (Lin<sup>-</sup>IL-7Rα<sup>+</sup>Id2<sup>+</sup>CD25<sup>-</sup>α4β7<sup>hi</sup>), which corresponds with CHILP (Lin<sup>-</sup>IL-7Rα<sup>+</sup>Id2<sup>+</sup>Fit3<sup>-</sup>α4β7<sup>hi</sup>). The green gate represents Gata3<sup>hi</sup> subset (Pop IVa); the red gate represents Gata3<sup>lo</sup> subset.

(C) Flow-cytometry analysis of siLP to identify ILC progeny generated *in vivo* after the individual adoptive transfers of progenitor cell populations IVa, IVb, and IVc, purified from the bone marrow of 5x polychromILC mice, into Rag2<sup>-/-</sup>Il2rgc<sup>-/-</sup> recipients.

(D) Flow-cytometric characterization of progenitor cell subpopulation III<sup>lo-kat+</sup> and analysis of the ILC progeny in siLP after the adoptive transfer of III<sup>lo-kat+</sup> progenitors, purified from the bone marrow of 5x polychromILC mice, into Rag2<sup>-/-</sup>Il2rgc<sup>-/-</sup> recipients.

Data are pooled from 2–4 independent experiments and represent mean ± SEM of 6–14 mice per group.

these factors is upregulated, the cells retain multipotency and give rise to NK cells and all ILC populations.

**CHILP-Related Cells Indicate Additional ILC Progenitor Heterogeneity**

Having identified multiple populations of ILC progenitors that were not committed to any particular ILC lineage, we examined their transcription factor expression in more detail. We first gated on Lin<sup>-</sup>IL-7Rα<sup>+</sup>Id2<sup>+</sup> cells then subsetted these on the basis of Bcl11b-tdTom expression with the Bcl11b<sup>-</sup>CD25<sup>-</sup> cells being equivalent to PopIV and the Bcl11b<sup>+</sup> cells being divided into PopI and PopIII on the basis of CD25 expression (Figure 4A). Within the Bcl11b<sup>-</sup>CD25<sup>-</sup> PopIV progenitors, we identified α4β7<sup>hi</sup> CHILPs and noted that the majority of these cells co-ex-

pressed Gata3-hCD2 and Rora-Teal, PD-1, and PLZF, indicating the existence of ILCPs (Figure 4B). Accordingly, these Gata3-hCD2<sup>+</sup>Rora-Teal<sup>+</sup> ILCPs (also identified herein as PopIVa cells) produced all ILC lineages, but also Rora-Teal<sup>-</sup> NK cells (Figure 4C). The majority of Bcl11b<sup>-</sup>CD25<sup>-</sup>α4β7<sup>lo</sup> cells were also Gata3-hCD2<sup>+</sup>Rora-Teal<sup>+</sup> (PopIVb) and, like IVa, gave rise to mixed progeny of all ILC lineages and NK cells (Figures 4A and 4C). A small fraction (1%–2%) of these Lin<sup>-</sup>IL-7Rα<sup>+</sup>Id2<sup>+</sup>Bcl11b<sup>-</sup>CD25<sup>-</sup>Gata3<sup>hi</sup>α4β7<sup>lo</sup> cells expressed Rorc-Kat (PopIVc), although this had minimal effect on the progeny obtained from adoptive transfer (Figures 4A and 4C). Rorc-Kat expression within PopIII<sup>lo</sup> was designated PopIII<sup>lo-kat+</sup>: Lin<sup>-</sup>IL-7Rα<sup>+</sup>Id2<sup>+</sup>Bcl11b<sup>+</sup>CD25<sup>-</sup>Gata3<sup>lo</sup>α4β7<sup>int</sup>RORγt<sup>+</sup> (Figure 4A). Notably, adoptive transfer of PopIII<sup>lo-kat+</sup> generated primarily



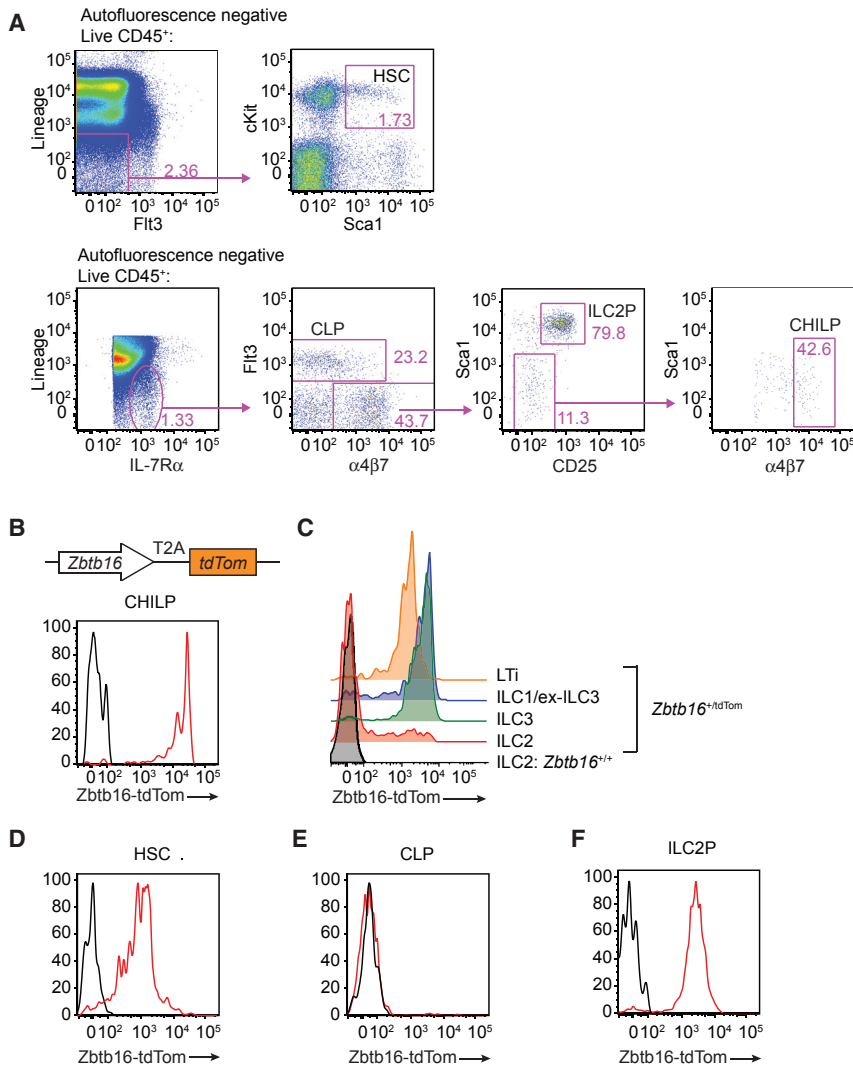

**Figure 5. Zbtb16-tdTom Reporter Reveals Fluctuating Expression throughout Hematopoiesis**

(A) Flow-cytometric gating strategy for HSC, CLP, CHILP, and ILC2P subsets in *Zbtb16*<sup>+/tdTom</sup> bone marrow.

(B) Flow-cytometric analysis of Zbtb16-tdTom in bone-marrow-derived CHILP (Lin<sup>-</sup>CD45<sup>+</sup>IL-7R $\alpha$ <sup>+</sup> $\alpha$ 4 $\beta$ 7<sup>hi</sup>Sca1<sup>int/lo</sup>Flt3<sup>-</sup>CD25<sup>-</sup>).

(C) Flow-cytometry analysis of Zbtb16-tdTom expression in the ILC subsets in the siLP of *Zbtb16*<sup>+/tdTom</sup> mice.

(D) Flow-cytometry analysis of Zbtb16-tdTom expression in bone marrow-derived HSCs (Lin<sup>-</sup>CD45<sup>+</sup>Kit<sup>+</sup>Sca1<sup>+</sup>Flt3<sup>-</sup>).

(E) Flow-cytometry analysis of Zbtb16-tdTom expression in bone-marrow-derived CLPs (Lin<sup>-</sup>CD45<sup>+</sup>IL-7R $\alpha$ <sup>+</sup>Flt3<sup>+</sup>).

(F) Flow-cytometry analysis of Zbtb16-tdTom expression in bone-marrow-derived ILC2Ps (Lin<sup>-</sup>CD45<sup>+</sup>IL-7R $\alpha$ <sup>+</sup> $\alpha$ 4 $\beta$ 7<sup>+</sup>Sca1<sup>hi</sup>Flt3<sup>-</sup>CD25<sup>-</sup>).

Data are representative of 2 independent experiments. Please also see Figure S5.

ILC3s and ILC2s and very few ILC1s or NK cells (Figure 4D). We were unable to identify LTI-like cells, as defined by CCR6 expression, from any of the populations analyzed (data not shown).

Together, these results demonstrate that ILCPs, or at least a proportion of ILCPs (or CHILPs), retain the capacity to generate NK cells. Furthermore, 5x polychromILC mice allowed us to identify ILCP-related populations that also generated NK cells and all ILC subsets. Notably, the introduction of the Rorc-Kat reporter enabled the identification of a progenitor with greater restriction to the ILC3 lineage.

### Zbtb16-tdTom Reporter Reveals Fluctuating Expression throughout Hematopoiesis

It has been reported that PLZF (encoded by *Zbtb16*) expression identifies a subset of CHILPs that are ILC restricted, designated ILCPs, and that LTI cells appear to have no history of PLZF expression as indicated via a *Zbtb16* fate-map and reporter approach, suggesting they originated from a putative PLZF<sup>-</sup> ILC progenitor (Constantinides et al., 2014). We generated a *Zbtb16*-tdTom reporter (*Zbtb16*<sup>tdTom</sup> allele) with the tdTomato

protein expressed downstream of a self-splicing T2A sequence (Figures S5A and S5B), in direct relation to PLZF protein (Figure S5C). Analysis of progenitors in the bone marrow and mature ILCs in the siLP indicated no significant effects on the proportions of these cells because of gene targeting (Figures S5D and S5E). Although NKT and NK cells were reduced in *Zbtb16*<sup>tdTom/tdTom</sup> mice, no detectable changes were observed in immune cell populations measured in the *Zbtb16*<sup>tdTom/+</sup> mice subsequently used in experiments (Figures S5F and S5G). Zbtb16-tdTom was found to be highly expressed in all CHILPs (Lin<sup>-</sup>IL-7R $\alpha$ <sup>+</sup>Id2<sup>+</sup>Flt3<sup>-</sup> $\alpha$ 4 $\beta$ 7<sup>hi</sup>) (Figures 5A and 5B). Furthermore, contrary to a previous report (Constantinides et al., 2014), we found Zbtb16-tdTom in all LTI cells (including fetal LTI), ILC1s, and ILC3s present in the siLP, but not in the majority of mature ILC2s (Figures 5C and S5H). Zbtb16-tdTom reporter expression was also detected in most hematopoietic stem cells (HSCs) (Figures 5A and 5D), but not CLPs (Figures 5A and 5E), indicating fluctuating *Zbtb16* gene expression during hematopoiesis, and expression was also detected in ILC2Ps (Figures 5A and 5F).

### In vitro Cell Differentiation Analysis Identifies Multipotent and ILC3-Restricted ILC Progenitors

To complement the *in vivo* adoptive transfer studies, we performed *in vitro* ILC progenitor differentiation assays by using purified progenitor subpopulations from the 5x polychromILC mice. 5x-polychromILC-defined progenitor subsets were co-cultured on OP9 stromal cells with IL-7 and stem cell factor (SCF) to assess their lineage potential (Figure 6A). *In vitro* culture of Popl produced ILC2s (data not shown). However, far greater lineage diversity was observed when assessing the progeny

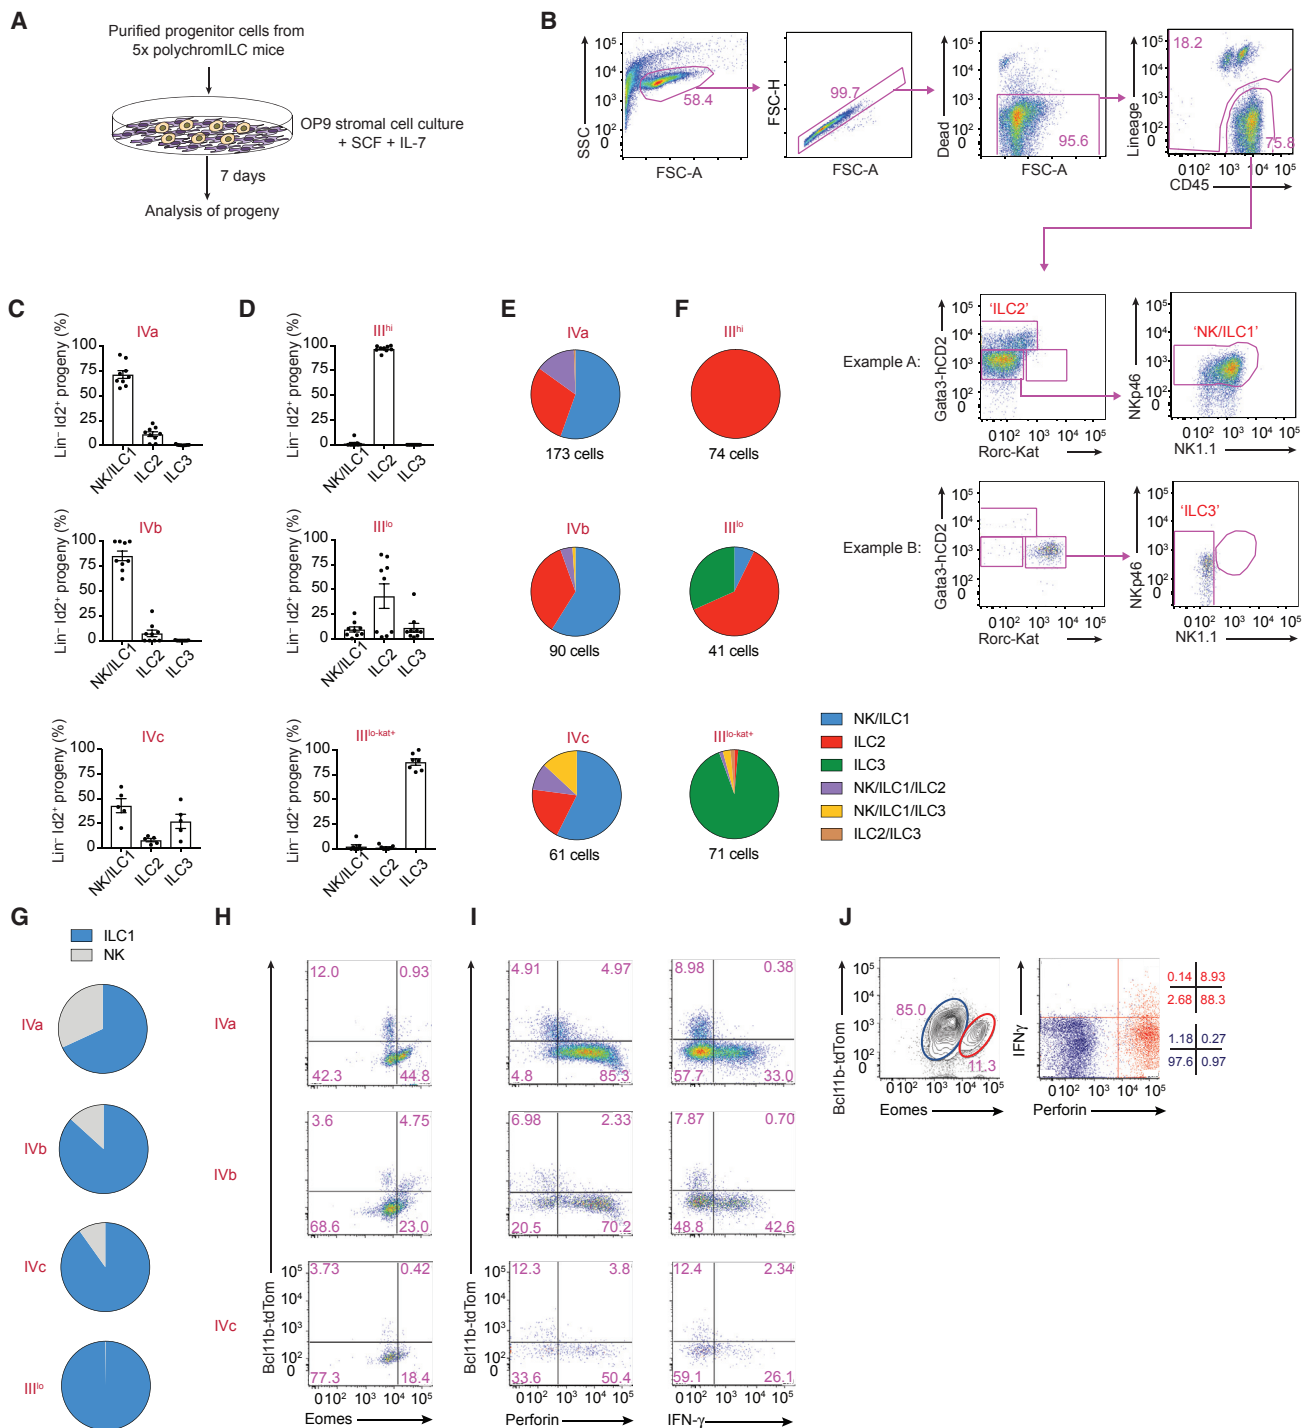

**Figure 6. *In Vitro* Analysis Identifies Multipotent and ILC3-Restricted ILC Progenitors**

(A) Schematic of purified bone marrow progenitor populations co-cultured *in vitro* with OP9 stromal cells to facilitate ILC development.  
 (B) Representative flow-cytometry gating strategy for ILC subsets generated *in vitro* after co-culture of progenitor cell populations, purified from the bone marrow of the 5x polychromILC mice, with OP9 stromal cells.  
 (C) Flow-cytometry analysis of the proportions of ILC subsets generated *in vitro* after co-culture of progenitor cell populations IVa, IVb, and IVc, purified from the bone marrow of 5x polychromILC mice, with OP9 stromal cells.  
 (D) Flow-cytometry analysis of the proportions of ILC subsets generated *in vitro* after co-culture of progenitor cell populations III<sup>hi</sup>, III<sup>lo</sup>, and III<sup>lo-kat+</sup>, purified from the bone marrow of 5x polychromILC mice, with OP9 stromal cells.

(legend continued on next page)

from PopIII and PopIV, similar to results obtained *in vivo*. Cultures of progenitor subsets PopIVa and PopIVb both gave rise predominantly to NK and ILC1 cells and fewer ILC2s and almost no ILC3s (Figures 6B and 6C). PopIVc expressing Rorc-Kat produced almost equivalent proportions of ILC3 and NK or ILC1 cells (Figure 6C). Analysis of PopIII<sup>hi</sup> and PopIII<sup>lo</sup> essentially recapitulated the adoptive transfer data, with PopIII<sup>hi</sup> generating ILC2s and PopIII<sup>lo</sup> leading to mixed NK and/or ILC1, ILC2, and ILC3 progeny (Figure 6D). PopIII<sup>lo-kat+</sup> cells were committed almost exclusively to generating Rorc-Kat<sup>+</sup> ILC3s (Figure 6D).

To address whether the populations giving rise to mixed ILC progeny contained multipotent ILC progenitors or were a mixture of committed cells, we performed single-cell differentiation analysis. The majority of mixed lineage potential cells were located in the Bcl11b<sup>-</sup> subsets IVa, IVb, and IVc (Figure 6E). A proportion of single cells from PopIVa (and to a lesser extent PopIVb) gave rise to progeny consisting of a mixture of NK and/or ILC1s and ILC2s (Figure 6E). PopIVc also contained multipotent progenitors that gave rise to NK and/or ILC1 and ILC2 cells, but additionally harbored individual progenitors with NK and/or ILC1 and ILC3 potential, consistent with their expression of Rorc-Kat (Figure 6E). By contrast, the Bcl11b<sup>+</sup>PopIII<sup>hi</sup>, PopIII<sup>lo</sup>, and PopIII<sup>lo-kat+</sup> cells represented lineage-committed precursors (Figure 6F). The Gata3<sup>hi</sup> cells (PopIII<sup>hi</sup>) gave rise exclusively to ILC2s, whereas the Rorc<sup>+</sup> (PopIII<sup>lo-kat+</sup>) cells produced almost entirely ILC3s (Figure 6F). The remaining Gata3<sup>lo</sup>Rorc<sup>-</sup> (PopIII<sup>lo</sup>) cells contained committed progenitors for all three ILC lineages (Figure 6F).

To clarify the proportions of NK cells and ILC1s derived from subsets IVa, IVb, IVc, and III<sup>lo</sup>, we analyzed the expression of Eomes after differentiation in the presence of OP9 stroma. Although all four subsets produced ILC1 progeny (Figure 6G), NK potential, as determined by Eomes expression, was restricted to subsets IVa, IVb, and IVc (Figures 6G and 6H). Furthermore, on stimulation *in vitro* with IL-2, IL-15, and IL-18, the Bcl11b<sup>-</sup> cells from subsets IVa, IVb, and IVc upregulated perforin and IFN- $\gamma$  expression, whereas the Bcl11b<sup>+</sup> cells did not (Figure 6I). The Bcl11b<sup>-</sup> cells also had the potential to express T-bet (Figure S6A). We also assessed the capacity of progenitor cell populations IVa, IVb, and IVc to give rise to mature NK cells after transfer to *Rag2*<sup>-/-</sup>*Il2rgc*<sup>-/-</sup> mice. Following engraftment of the donor cells, *ex vivo* stimulation of splenocytes revealed the presence of Eomes, perforin, and IFN- $\gamma$ <sup>+</sup> NK cells from PopIVa (Figure 6J), but not IVb or IVc (Figure S6B). Together

these data indicate that the IVa progenitor population retains cell-intrinsic NK potential.

Although both the *in vivo* and *in vitro* approaches have their limitations, the *in vitro* data generally support our *in vivo* result but also demonstrate that in a more restricted environment TF<sup>+</sup> ILC progenitors might show greater lineage restriction. This is notable with the bias toward ILC1 and NK development observed in PopIVa and IVb, and the propensity of Rorc-Kat<sup>+</sup> populations to generate ILC3s.

### Single-Cell Analysis Identifies the Developmental Divergence of ILC2Ps and Heterogeneous ILC1, ILC3, and NK Progenitors

To further investigate the heterogeneity of the ILC and NK progenitors, we initially purified individual Lin<sup>-</sup>Id2<sup>+</sup> bone marrow cells (with a small number of Lin<sup>-</sup>Id2<sup>-</sup> cells also sampled for comparison) and performed single-cell RNA-sequencing (scRNA-seq) to profile progenitor cell gene expression. Subsequently, to obtain sufficient representation of the extremely rare cells, ILC progenitors were isolated as outlined above and summarized in Table S1. Data were then filtered to include only those cells that expressed the genes encoding *Id2* or *Il7ra*. Clustering identified three predominant cell clusters of ILCs and ILC and/or NK progenitors (clusters C1–C3) as shown on a t-distributed stochastic neighbor embedding (tSNE) plot (Figure 7A), as well as a number of other clusters: C4 and C5 were characterized by the expression of the B cell and/or myeloid gene *Sp1*, whereas C6 expressed the erythroid-specific gene *Gata1*, and a satellite cluster of C2 expressed the  $\gamma\delta$  T cell-TF *Sox13* (C2a). siLP-derived ILCs were also analyzed to provide comparison to bone marrow samples (clusters C7 and C8). These cells were characterized by the expression of markers more typical of mature ILC2 (cluster C7) or ILC1, ILC3, or NK cells (cluster C8). Analysis of siLP also identified a small cluster of cells expressing immunoglobulin transcripts (C9).

Cluster C1 was characterized by the expression of a spectrum of genes previously associated with early progenitor cell identity, including *Zbtb16*, *Pdcd1*, *Tox*, *Tox2*, *Cbfa2t3*, *Kit*, *Sox4*, *Hes1*, *Gata3*, and *Myb* (Figure 7B). *Cux1* and *Fgf3* were also found to preferentially distinguish cluster C1 (Figure 7B) but have not previously been linked to ILC development. Cluster C2 was characterized by genes associated with the ILC2 lineage, including *Il17rb*, *Il1r1*, *Lztf1*, and high expression of *Gata3* (Figure 7B). Cluster C3 was characterized by predominantly ILC1-, ILC3-, and NK-related genes (Figure 7B), indicating a

(E) Characterization of progeny derived from clonal analysis of single IVa, IVb, and IVc progenitor cells, purified from the bone marrow of 5x polychromILC mice, after co-culture with OP9 stromal cells.

(F) Characterization of progeny derived from single III<sup>hi</sup>, III<sup>lo</sup>, and III<sup>lo-kat+</sup> progenitor cells, purified from the bone marrow of 5x polychromILC mice, after co-culture with OP9 stromal cells.

(G) Proportion of Eomes<sup>+</sup> (NK) and Eomes<sup>-</sup> (ILC1) cells after co-culture of the indicated progenitor populations, purified from the bone marrow of 5x polychromILC mice, with OP9 stromal cells.

(H) Flow-cytometric analysis of cells derived from IVa, IVb, and IVc progenitor populations for the expression of Eomes (co-cultured with OP9 stromal cells).

(I) Flow-cytometric analysis of cells derived from IVa, IVb, and IVc progenitor populations for the expression of perforin and IFN- $\gamma$  (co-cultured with OP9 cells and stimulated for 48 hr with IL-2, IL-15, and IL-18).

(J) Flow-cytometric analysis of Bcl11b, Eomes, perforin, and IFN- $\gamma$  expression in LiveCD45.2<sup>+</sup> spleen cells stimulated *in vitro* with IL-2, IL-15, and IL-18, 6 weeks after transfer of IVa cells into *Rag2*<sup>-/-</sup>*Il2rgc*<sup>-/-</sup> recipients.

(A–D) Data are pooled from 3 independent experiments; mean  $\pm$  SEM of 5–9 replicate cultures. (E and F) Data are pooled from 3 independent experiments. (G) Data are pooled from 2 independent experiments. (H and I) Data are representative of 3 independent experiments. (J) shows data concatenated from 7 animals taken from 2 independent experiments. Please also see Figure S6.

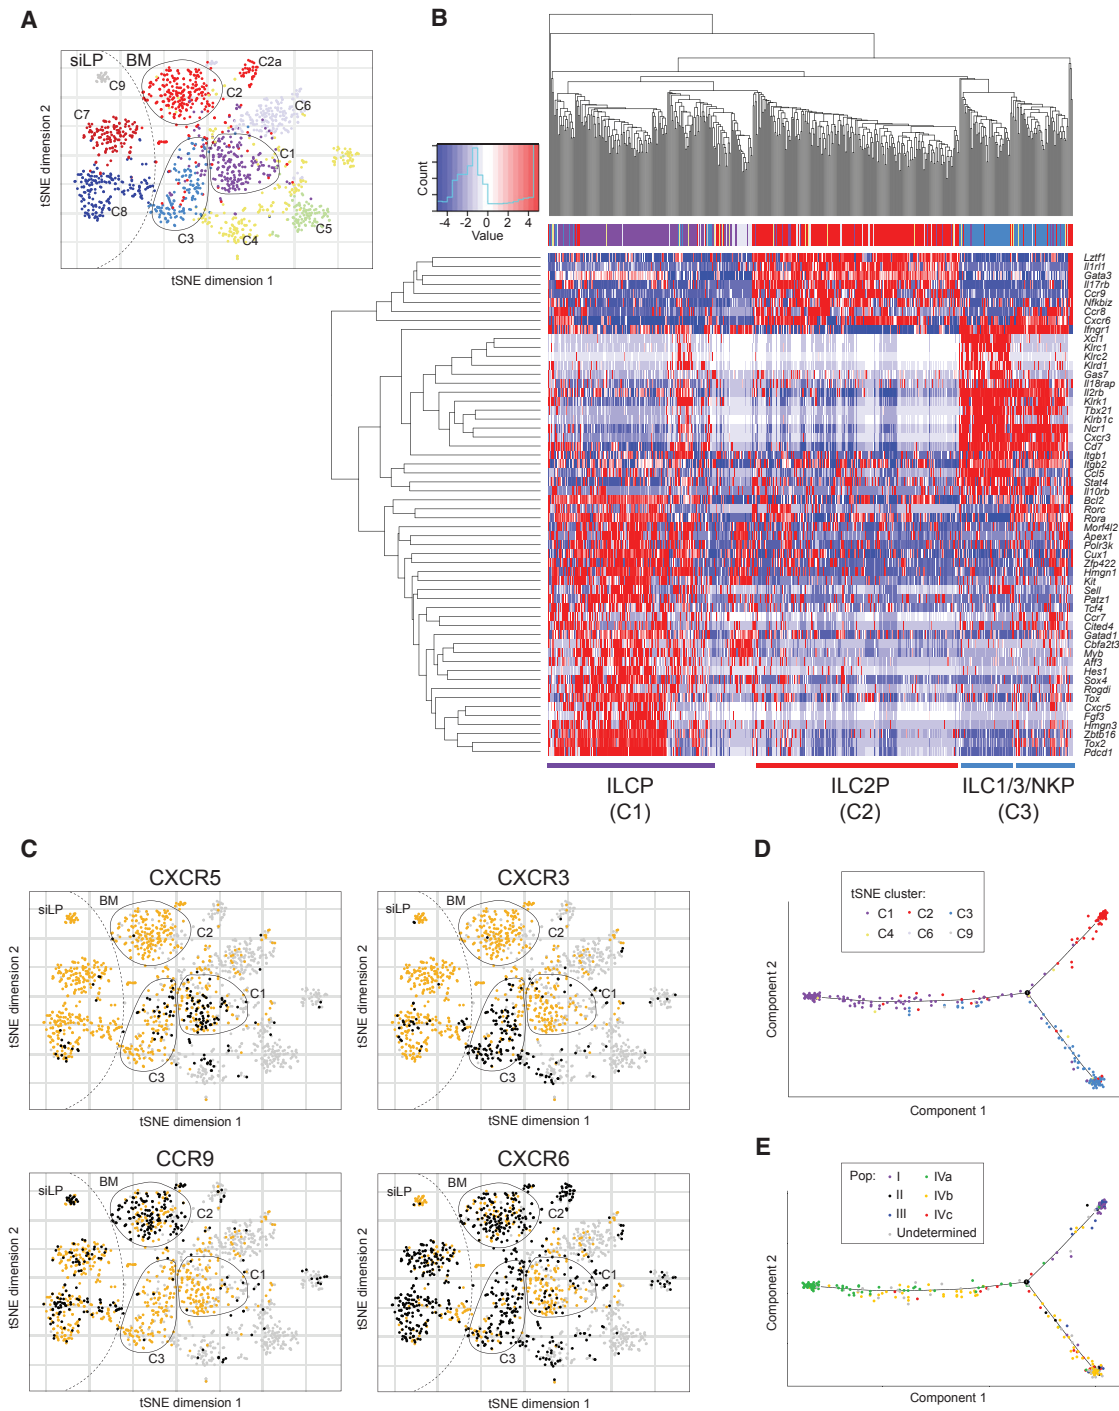

**Figure 7. Single-Cell Analysis Identifies Divergence of ILC2P and Heterogeneous ILC3, ILC1, and NK Progenitors**

(A) tSNE plot of single-cell gene expression analysis from bone marrow and siLP cells (1,637 individual cells) purified from 5x polychromILC mice. Black circles highlight clusters C1–C3. Dotted line divides cells acquired from siLP (left) and BM (right).

(B) Heatmap of selected genes differentially expressed between bone marrow cells not expressing *Spi1*, *Gata1*, or *Sox13* (504 cells, predominately cells in clusters C1–C3).

(C) tSNE plots of single-cell gene expression of chemokine receptors in the populations defined above in (A) and (B). Black dots indicate cells expressing > 5 normalized pseudocounts for the indicated gene; orange dots indicate cells expressing < 5 normalized pseudocounts for the indicated gene; and light gray dots indicate cells expressing *Spi1*, *Gata1*, or *Sox13*.

(legend continued on next page)

more heterogeneous population and supporting the *in vivo* and *in vitro* progenitor differentiation data. Clustering of expression based on the genes displayed in Figure 7B largely recapitulated the clustering shown in the tSNE plot (Figure 7A), suggesting these genes are among the most important in differentiating these cell types. Notably, we observed additional substructure in the gene expression patterns within cluster C3. One subcluster was characterized by the expression of NK-like genes including *Klr* transcripts, the chemokine *Xcl1*, and the absence of *Rora* and *Rorc*. Whereas the other subcluster contained cells expressing *Rora* and *Rorc* and had an absence of *Klr* genes (Figure 7B). Differential chemokine receptor expression delineated clusters: cells in cluster C1 were predominantly C-X-C motif chemokine receptor 5-positive (*Cxcr5*<sup>+</sup>) but *Cxcr6*<sup>-</sup>, whereas C2 cells expressed principally C-C motif chemokine receptor 9 (*Ccr9*), and *Cxcr3* was largely restricted to C3 (Figure 7C).

To investigate the potential lineage relationship between the progenitors, we performed pseudotime analysis on the bone marrow ILC and NK progenitors by using data from cells that did not express *Spi1*, *Gata1*, or *Sox13*, and that were sequenced with greater read depth (predominately cells in clusters C1–C3). Using this approach, we identified developmental intermediates along a trajectory from the early progenitor cells located in cluster C1 toward a bifurcation point at which the ILC2Ps (cluster C2) and the putative ILC1, ILC3, and NK progenitors (cluster C3) diverged (Figure 7D). Furthermore, using index sequencing data captured during sample collection, we mapped the phenotypes of individual cells onto the pseudotime plot (Figures 7E and S7A). Cluster C2 consisted primarily of cells sorted from population I. The majority of cells in cluster C1 correlated to population IVa, whereas cluster C3 and the transitional states comprised a heterogeneous mix of multiple phenotypes. Altogether these data corroborate our *in vivo* and *in vitro* analyses of NK and ILC developmental potential, demonstrating the existence of Id2<sup>+</sup> multipotent bone marrow ILC1, ILC3, and NK progenitors. Furthermore, they highlight the heterogeneous potential of the ILC and NK progenitors and how this is distinct from the relatively uniform differentiation of the more frequent ILC2Ps.

## DISCUSSION

Multiple TFs have been associated with ILC differentiation and a number of progenitor states, including the EILP,  $\alpha$ LP, CHILP, ILCP, and ILC2P, have been defined on the basis of combinations of surface protein and TF reporter expression (Constantinides et al., 2014; Harly et al., 2018; Klose et al., 2014; Seillet et al., 2016; Walker et al., 2015; Wong et al., 2012; Yang et al., 2015; Yu et al., 2016; Yu et al., 2015). In this study, the generation of 5x polychromILC mice enabled us to delineate bone marrow ILC progenitors on the basis of expression of 5 key ILC-associated TFs: Id2, Bcl11b, Gata3, ROR $\alpha$ , and ROR $\gamma$ t. This approach enabled the resolution and isolation of rare progenitor cell popu-

lations for subsequent analysis of lineage potential and gene expression.

Among the Id2-BFP<sup>+</sup> bone marrow cells, ILC2Ps were predominant, and Id2-BFP<sup>+</sup>Bcl11b-tdTom<sup>+</sup>Gata3-hCD2<sup>hi</sup> bone marrow cells gave rise exclusively to ILC2 progeny. Indeed, Bcl11b<sup>+</sup> and Gata3<sup>hi</sup> co-expression was sufficient to ensure ILC2 commitment in cells that had not upregulated CD25 (PopIII<sup>hi</sup>). Upregulation of Bcl11b alone was insufficient to drive ILC2 commitment given that Bcl11b<sup>+</sup>Gata3<sup>lo</sup> cells (III<sup>lo</sup>) retained the capacity to generate all other ILC and NK lineages. A small fraction of this uncommitted Bcl11b<sup>+</sup>Gata3<sup>lo</sup> cell subset expressed Rorc-Kat (III<sup>lo-kat+</sup>) and had a greater propensity to generate ILC3 upon adoptive transfer and gave exclusively ILC3s upon *in vitro* culture. These elusive cells (approximately 1 cell in a million in the bone marrow) appear to represent the earliest committed ILC3 progenitors in mouse bone marrow, and their discovery demonstrates the utility of our multi-TF-driven approach. Although ILC progenitors might seed the peripheral tissues and differentiate *in situ* to populate the ILC3 niche, our results now raise the possibility that already-committed bone-marrow-derived ILC3 progenitors populate mucosal tissues. Future studies will be needed to determine the relative contributions of these alternative pathways for ILC3 generation.

We also identified a spectrum of multipotent Id2<sup>+</sup>Bcl11b<sup>-</sup> bone marrow populations that were heterogeneous with respect to  $\alpha$ 4 $\beta$ 7 integrin and Gata3 expression. A major fraction of these cells was  $\alpha$ 4 $\beta$ 7<sup>hi</sup>Gata3<sup>+</sup> (IVa) and co-expressed PLZF and PD-1 and corresponded to the ILCP reported previously to be an ILC1-, ILC2-, ILC3-restricted progenitor (Constantinides et al., 2014; Harly et al., 2018). However, we observed that in addition to generating ILC1s, ILC2s, and ILC3s, these ILCPs gave rise to a population of Rora-Teal<sup>-</sup>lineage<sup>+</sup>NK1.1<sup>+</sup>NKp46<sup>+</sup> NK cells that expressed Eomes and perforin, indicating additional lineage potential. Thus ILCP, as currently defined, is not exclusively ILC-lineage restricted but retains some NK lineage potential. A recent report utilizing Id2 and PLZF reporters has also demonstrated that an ILCP population has the potential to differentiate into ILC1, ILC2, ILC3, and NK cells (Xu et al., 2019). We also identified a minor fraction of  $\alpha$ 4 $\beta$ 7<sup>lo</sup>Gata3<sup>+</sup> ILCP-related cells (IVb), a small proportion of which also expressed Rorc-Kat (IVc) that also gave rise to a population of Rora-Teal<sup>-</sup>Lin<sup>+</sup>NK1.1<sup>+</sup>NKp46<sup>+</sup> NK cells, in addition to ILC1s, ILC2s, and ILC3s. Although a small proportion of  $\alpha$ 4 $\beta$ 7<sup>lo</sup> ILCP-related cells expressed Rorc-Kat, unlike their Bcl11b<sup>+</sup> counterparts, these cells showed little propensity for ILC3 restriction after stromal cell co-culture or adoptive transfer. Rather than signifying commitment, Rorc-Kat expression in this instance could reflect the multi-lineage priming reported to occur prior to ILC-lineage commitment during embryogenesis (Ishizuka et al., 2016).

The expression of PLZF has been used to define the transition between CHILP and ILCP (Constantinides et al., 2014; Klose et al., 2014) and has been associated with an ILC-committed progenitor population that has lost the capacity to generate NK

(D) Cell trajectory from pseudotime analysis of a subset of bone marrow cells not expressing *Spi1*, *Gata1*, or *Sox13* and sequenced with greater read depth (328 cells, predominately cells in clusters C1–C3). Shown is the trajectory from the early progenitor cells located in cluster C1 toward a bifurcation point at which the ILC2P cells (largely cluster C2) and the ILC3, ILC1, and NK cells (largely cluster C3) diverge.

(E) Overlay of index-sorted cell phenotype onto the pseudotime trajectory shown in (D). Please also see Figure S7.

cells and LTi. It has been postulated that LTi cells originate from PLZF<sup>-</sup> progenitors on the basis of cell fate analyses (Xu et al., 2019) and the observation that mature LTi are negative for both fate-mapping and expression reporters in a strain that drives expression of a Cre-GFP fusion protein from the *Zbtb16* promoter as part of a bicistronic allele utilizing an IRES sequence (Constantinides et al., 2014). However, our data indicate that the vast majority of HSCs, CHILPs, and mature LTi cells are *Zbtb16*-tdTom<sup>+</sup>. Similarly, EILPs have also been reported to be PLZF<sup>+</sup> (Harly et al., 2018). It is thus surprising that LTi cells were fate-mapper negative in the PLZF-fm strain (Constantinides et al., 2014). This discrepancy might reflect a lower expression of the Cre-GFP fusion protein and/or inefficiency of Cre excision of the STOP cassette, which triggers fate-mapping reporter expression, or might be attributable to the requirement to remove FM<sup>+</sup> bone marrow (BM) cells and reconstitute recipients with FM<sup>-</sup> cells because of PLZF expression during mouse development (Constantinides et al., 2014). By contrast, our *Zbtb16*<sup>tdTom</sup> strain showed a wide dynamic range of reporter expression (CHILPs > ILC2Ps > HSCs > CLPs), which accurately recapitulated the profile of PLZF protein expression determined by intracellular staining. Incorporation of the *Zbtb16*<sup>tdTom</sup> allele into additional compound reporter strains might help to clarify the role of PLZF in ILC commitment.

Single-cell gene expression analysis of ILC bone marrow progenitors revealed three predominant clusters of cells with distinct ILC-associated gene expression patterns: an early progenitor (C1), an ILC2P population (C2), and a mixed ILC1, ILC3, and NK progenitor population (C3). C1 was characterized by genes associated with early progenitors including *Zbtb16*, *Pdcd1*, *Tox*, *Tox2*, *Kit*, *Sox4*, *Hes1*, *Gata3*, and *Myb* (Allan et al., 2017; Cherrier et al., 2018; Eberl et al., 2004; Ishizuka et al., 2016; Lee et al., 2011; Seehus et al., 2015; Wong et al., 2012; Yu et al., 2016; Zhu, 2017). Indeed, the widespread expression of *Zbtb16* (PLZF) and *Pdcd-1* (PD-1) in C1 suggests they are ILCPs (population IVa in our analysis). PD-1 has been reported as a marker of PLZF<sup>+</sup> ILCPs (Seillet et al., 2016; Yu et al., 2016), though the absence of PLZF (Harly et al., 2018) or PD-1 in mice did not alter ILCP development (Seillet et al., 2016). C1 was also characterized by the expression of transcriptional repressors such as core binding factor *Cbfa2t3* (Seillet et al., 2016) and *Cux1*, a repressor for which there are multiple binding sites in the *Zbtb16* promoter region (Fréchet et al., 2010) but which has not been linked previously with ILC progenitors. Cluster 2 was clearly ILC2Ps, characterized by the expression of the *Il17rb* and *Il1rl1* encoding the receptors for IL-25 and IL-33 and high amounts of *Gata3* (Halim et al., 2012; Yu et al., 2016; Zhu, 2017). *Lztf1*, the gene encoding leucine zipper transcription-factor-like 1 (LZTFL1), is reported to be expressed in all mature ILC subsets in the small intestine but here was largely restricted to the ILC2Ps. Cluster 3 represented a highly heterogeneous population which shared both ILC1, ILC3, and NK cell gene expression signatures. Two subclusters were present in C3. The putative ILC1 and ILC3 progenitors frequently co-expressed *Tbx21* and *Rorc*, in addition to *Ncr1* (encoding NKp46), suggesting their potential to generate either lineage. The other subcluster was characterized by the expression of *Klr* genes and *Tbx21*, but not *Rorc* or *Rora*, highlighting their probable commitment to the NK cell lineage. C3 was most clearly delineated from ILCPs and

ILC2Ps by the expression of CD7, a cell surface molecule used as a pan-ILC marker in human studies (Lim et al., 2017) that is poorly studied in mouse ILC biology. Although a small number of genes were expressed by most cells in C3, this cluster was otherwise notable for the heterogeneity of gene expression.

Clusters C1, C2, and C3 could be discriminated by their chemokine receptors. As shown previously, CXCR6 expression defines a proportion of EILPs and  $\alpha$ LPs (Yang et al., 2015; Yu et al., 2014); however, CXCR6<sup>-</sup>  $\alpha$ LPs also appear capable of generating ILCs and NK cells (Yu et al., 2014). Our single-cell analysis indicated that only relatively few cells in cluster C1 expressed *Cxcr6* but that almost all cells in clusters C2 and C3 were *Cxcr6*<sup>+</sup>, indicating that this marker has limited specificity among ILC resident bone marrow progenitors. However, it is notable that the deletion of CXCR6 results in a modest accumulation of ILCPs in the bone marrow (Chea et al., 2015). A recent study reported that *Cxcr5* expression, assessed by bulk cell population gene expression analysis, was absent in  $\alpha$ LP, moderately induced in EILP, and highest in ILCPs and surface CXCR5 was detected on ILCPs (Harly et al., 2018). With the benefit of 5x polychromILC mice to enrich, identify, and isolate rare single progenitors, we identified that *Cxcr5* expression was mostly restricted to C1 and there was little to no expression detected in C2 or C3. This suggests that *Cxcr5* expression is a useful marker of the ILCPs. However, it is unclear what role CXCR5 is playing in ILC development. CXCR3 has been reported to be expressed on mature ILC1s (Cortez et al., 2015; Klose et al., 2014), although its role in ILC progenitor biology is unknown. As reported previously, CCR9 is primarily expressed on ILC2Ps (Hoyler et al., 2012), as we observed in cluster C2 in the bone marrow, and ILC2 homing to the small intestine is impaired in *Ccr9*<sup>-/-</sup> mice (Kim et al., 2015).

These clusters, defined by gene expression, mirror the bone marrow progenitors identified during the phenotypic characterization of 5x polychromILC mice. Our pseudotime analysis suggests that the switch associated with ILC2 lineage commitment represents a rapid and concerted alteration in gene expression leading to “all-or-nothing” lineage commitment with very few cells representing intermediates along the ILC2P branch. In contrast, many more transition states were located between the early progenitor (ILCP) and putative ILC1, ILC3, and NK progenitors, reflecting the heterogeneity in TF and surface molecule expression that we observed among non-ILC2P bone marrow progenitors. A recent report has described a similar divergence of human ILC2 progenitors from a progenitor with shared NK cell and ILC3 lineage potential (Chen et al., 2018).

Our data support a model whereby EILPs progress directly to the PLZF<sup>+</sup> ILCP state, then progress through a trans-ILCP intermediate phase before expressing TFs characteristic of lineage-committed progenitors and divergence of ILC2Ps from a common NK, ILC1, and ILC3 developmental pathway (Figure S7B).

## STAR★METHODS

Detailed methods are provided in the online version of this paper and include the following:

- KEY RESOURCES TABLE
- CONTACT FOR REAGENTS AND RESOURCE SHARING

## ● METHOD DETAILS

- Mice
- Generation of *Rorc*<sup>Kat</sup> gene-targeted mice
- Generation of *Id2*<sup>BFP</sup> gene-targeted mice
- Generation of *Gata3*<sup>hCD2</sup> gene-targeted mice
- Generation of *Rora*<sup>Teal</sup> gene-targeted mice
- Generation of *Zbtb16*<sup>tdTom</sup> gene-targeted mice
- Tissue preparation
- Flow cytometry
- Adoptive transfers
- OP9 stromal cell co-cultures
- Single cell RNA-sequencing and analysis
- Statistical analysis

## ● DATA AND SOFTWARE AVAILABILITY

### SUPPLEMENTAL INFORMATION

Supplemental Information can be found online at <https://doi.org/10.1016/j.immuni.2019.05.002>.

### ACKNOWLEDGMENTS

We thank the Ares staff, genotyping facility and flow cytometry core for their technical assistance. We are grateful to Pentao Liu for providing the Bcl11b-tdTomato mice. This study was supported by grants from the UK Medical Research Council (U105178805) and Wellcome Trust (100963/Z/13/Z). L.H.V held an EMBL Interdisciplinary Postdoctoral fellowship, supported by H2020 Marie Skłodowska Curie Actions.

### AUTHOR CONTRIBUTIONS

J.A.W. designed and performed experiments and wrote the paper. P.A.C. designed reporter mouse strains and performed experiments. A.C. performed bioinformatics analysis. A.S., B.M.J.R., H.E.J., M.D., J.C., M.S., R.P., A.C.F.F., J.L.B., N.R.R., L.H.-V., and S.T. performed experiments and provided advice on experimental design and interpretation. A.N.J.M. supervised the project, designed experiments, and wrote the paper.

### DECLARATION OF INTERESTS

The authors declare the following competing interests: A.N.J.M. has received grant funding from MedImmune and GlaxoSmithKline.

Received: December 19, 2018

Revised: March 29, 2019

Accepted: May 2, 2019

Published: May 22, 2019

### REFERENCES

- Allan, D.S.J., Cerdeira, A.S., Ranjan, A., Kirkham, C.L., Aguilar, O.A., Tanaka, M., Childs, R.W., Dunbar, C.E., Strominger, J.L., Kopcow, H.D., and Carlyle, J.R. (2017). Transcriptome analysis reveals similarities between human blood CD3<sup>-</sup> CD56<sup>bright</sup> cells and mouse CD127<sup>+</sup> innate lymphoid cells. *Sci. Rep.* **7**, 3501.
- Burt, B.M., Plitas, G., Stableford, J.A., Nguyen, H.M., Bamboat, Z.M., Pillarisetty, V.G., and DeMatteo, R.P. (2008). CD11c identifies a subset of murine liver natural killer cells that responds to adenoviral hepatitis. *J. Leukoc. Biol.* **84**, 1039–1046.
- Califano, D., Cho, J.J., Uddin, M.N., Lorentsen, K.J., Yang, Q., Bhandoola, A., Li, H., and Avram, D. (2015). Transcription factor Bcl11b controls identity and function of mature type 2 innate lymphoid cells. *Immunity* **43**, 354–368.
- Chea, S., Possot, C., Perchet, T., Petit, M., Cumano, A., and Golub, R. (2015). CXCR6 expression is important for retention and circulation of ILC precursors. *Mediators Inflamm.* **2015**, 368427.
- Chen, L., Youssef, Y., Robinson, C., Ernst, G.F., Carson, M.Y., Young, K.A., Scoville, S.D., Zhang, X., Harris, R., Sekhri, P., et al. (2018). CD56 expression marks human group 2 innate lymphoid cell divergence from a shared NK Cell and group 3 innate lymphoid cell developmental pathway. *Immunity* **49**, 464–476.e4.
- Cherrier, M., Sawa, S., and Eberl, G. (2012). Notch, Id2, and ROR $\gamma$ t sequentially orchestrate the fetal development of lymphoid tissue inducer cells. *J. Exp. Med.* **209**, 729–740.
- Cherrier, D.E., Serafini, N., and Di Santo, J.P. (2018). Innate lymphoid cell development: a T cell perspective. *Immunity* **48**, 1091–1103.
- Colonna, M. (2018). Innate lymphoid cells: diversity, plasticity, and unique functions in immunity. *Immunity* **48**, 1104–1117.
- Constantinides, M.G., McDonald, B.D., Verhoef, P.A., and Bendelac, A. (2014). A committed precursor to innate lymphoid cells. *Nature* **508**, 397–401.
- Cortez, V.S., Robinette, M.L., and Colonna, M. (2015). Innate lymphoid cells: new insights into function and development. *Curr. Opin. Immunol.* **32**, 71–77.
- Eberl, G., Marmon, S., Sunshine, M.J., Rennert, P.D., Choi, Y., and Littman, D.R. (2004). An essential function for the nuclear receptor ROR $\gamma$ (t) in the generation of fetal lymphoid tissue inducer cells. *Nat. Immunol.* **5**, 64–73.
- Eberl, G., Colonna, M., Di Santo, J.P., and McKenzie, A.N. (2015). Innate lymphoid cells. *Innate lymphoid cells: a new paradigm in immunology. Science* **348**, aaa6566.
- Fréchette, I., Darsigny, M., Brochu-Gaudreau, K., Jones, C., and Boudreau, F. (2010). The Promyelocytic Leukemia Zinc Finger (PLZF) gene is a novel transcriptional target of the CCAAT-Displacement-protein (CUX1) repressor. *FEBS J.* **277**, 4241–4253.
- Halim, T.Y., MacLaren, A., Romanish, M.T., Gold, M.J., McNagny, K.M., and Takei, F. (2012). Retinoic-acid-receptor-related orphan nuclear receptor alpha is required for natural helper cell development and allergic inflammation. *Immunity* **37**, 463–474.
- Harly, C., Cam, M., Kaye, J., and Bhandoola, A. (2018). Development and differentiation of early innate lymphoid progenitors. *J. Exp. Med.* **215**, 249–262.
- Hoyler, T., Klose, C.S., Souabni, A., Turqueti-Neves, A., Pfeifer, D., Rawlins, E.L., Voehringer, D., Busslinger, M., and Diefenbach, A. (2012). The transcription factor GATA-3 controls cell fate and maintenance of type 2 innate lymphoid cells. *Immunity* **37**, 634–648.
- Ishizuka, I.E., Chea, S., Gudjonson, H., Constantinides, M.G., Dinner, A.R., Bendelac, A., and Golub, R. (2016). Single-cell analysis defines the divergence between the innate lymphoid cell lineage and lymphoid tissue-inducer cell lineage. *Nat. Immunol.* **17**, 269–276.
- Jackson, J.T., Hu, Y., Liu, R., Masson, F., D'Amico, A., Carotta, S., Xin, A., Camilleri, M.J., Mount, A.M., Kallies, A., et al. (2011). Id2 expression delineates differential checkpoints in the genetic program of CD8 $\alpha$ <sup>+</sup> and CD103<sup>+</sup> dendritic cell lineages. *EMBO J.* **30**, 2690–2704.
- Kim, M.H., Taparowsky, E.J., and Kim, C.H. (2015). Retinoic acid differentially regulates the migration of innate lymphoid cell subsets to the gut. *Immunity* **43**, 107–119.
- Klose, C.S.N., Flach, M., Möhle, L., Rogell, L., Hoyler, T., Ebert, K., Fabiunke, C., Pfeifer, D., Sexl, V., Fonseca-Pereira, D., et al. (2014). Differentiation of type 1 ILCs from a common progenitor to all helper-like innate lymphoid cell lineages. *Cell* **157**, 340–356.
- Krabbendam, L., Bal, S.M., Spits, H., and Golebski, K. (2018). New insights into the function, development, and plasticity of type 2 innate lymphoid cells. *Immunol. Rev.* **286**, 74–85.
- Lee, J.S., Cella, M., McDonald, K.G., Garlanda, C., Kennedy, G.D., Nukaya, M., Mantovani, A., Kopan, R., Bradfield, C.A., Newberry, R.D., and Colonna, M. (2011). AHR drives the development of gut ILC22 cells and postnatal lymphoid tissues via pathways dependent on and independent of Notch. *Nat. Immunol.* **13**, 144–151.
- Li, P., Burke, S., Wang, J., Chen, X., Ortiz, M., Lee, S.C., Lu, D., Campos, L., Goulding, D., Ng, B.L., et al. (2010). Reprogramming of T cells to natural killer-like cells upon Bcl11b deletion. *Science* **329**, 85–89.
- Lim, A.I., Li, Y., Lopez-Lastra, S., Stadhouders, R., Paul, F., Casrouge, A., Serafini, N., Puel, A., Bustamante, J., Surace, L., et al. (2017). Systemic human

- ILC precursors provide a substrate for tissue ILC differentiation. *Cell* 168, 1086–1100.e10.
- Lun, A.T., McCarthy, D.J., and Marioni, J.C. (2016). A step-by-step workflow for low-level analysis of single-cell RNA-seq data with Bioconductor. *F1000Res* 5, 2122.
- McCarthy, D.J., Campbell, K.R., Lun, A.T., and Wills, Q.F. (2017). Scater: pre-processing, quality control, normalization and visualization of single-cell RNA-seq data in R. *Bioinformatics* 33, 1179–1186.
- Mjösberg, J., and Spits, H. (2016). Human innate lymphoid cells. *J. Allergy Clin. Immunol.* 138, 1265–1276.
- Moro, K., Yamada, T., Tanabe, M., Takeuchi, T., Ikawa, T., Kawamoto, H., Furusawa, J., Ohtani, M., Fujii, H., and Koyasu, S. (2010). Innate production of T(H)2 cytokines by adipose tissue-associated c-Kit<sup>+</sup>Sca-1<sup>+</sup> lymphoid cells. *Nature* 463, 540–544.
- Ng, K.K., Yui, M.A., Mehta, A., Siu, S., Irwin, B., Pease, S., Hirose, S., Elowitz, M.B., Rothenberg, E.V., and Kueh, H.Y. (2018). A stochastic epigenetic switch controls the dynamics of T-cell lineage commitment. *eLife* 7, e37851.
- Patro, R., Duggal, G., Love, M.I., Irizarry, R.A., and Kingsford, C. (2017). Salmon provides fast and bias-aware quantification of transcript expression. *Nat. Methods* 14, 417–419.
- Picelli, S., Faridani, O.R., Björklund, A.K., Winberg, G., Sagasser, S., and Sandberg, R. (2014). Full-length RNA-seq from single cells using Smart-seq2. *Nat. Protoc.* 9, 171–181.
- Price, A.E., Liang, H.E., Sullivan, B.M., Reinhardt, R.L., Easley, C.J., Erle, D.J., and Locksley, R.M. (2010). Systemically dispersed innate IL-13-expressing cells in type 2 immunity. *Proc. Natl. Acad. Sci. USA* 107, 11489–11494.
- Qiu, X., Hill, A., Packer, J., Lin, D., Ma, Y.A., and Trapnell, C. (2017a). Single-cell mRNA quantification and differential analysis with Census. *Nat. Methods* 14, 309–315.
- Qiu, X., Mao, Q., Tang, Y., Wang, L., Chawla, R., Pliner, H.A., and Trapnell, C. (2017b). Reversed graph embedding resolves complex single-cell trajectories. *Nat. Methods* 14, 979–982.
- Robinette, M.L., Fuchs, A., Cortez, V.S., Lee, J.S., Wang, Y., Durum, S.K., Gilfillan, S., Colonna, M., and Immunological Genome, C.; Immunological Genome Consortium (2015). Transcriptional programs define molecular characteristics of innate lymphoid cell classes and subsets. *Nat. Immunol.* 16, 306–317.
- Seehus, C.R., Aliahmad, P., de la Torre, B., Iliev, I.D., Spurka, L., Funari, V.A., and Kaye, J. (2015). The development of innate lymphoid cells requires TOX-dependent generation of a common innate lymphoid cell progenitor. *Nat. Immunol.* 16, 599–608.
- Seillet, C., Mielke, L.A., Amann-Zalcenstein, D.B., Su, S., Gao, J., Almeida, F.F., Shi, W., Ritchie, M.E., Naik, S.H., Huntington, N.D., et al. (2016). Deciphering the innate lymphoid cell transcriptional program. *Cell Rep.* 17, 436–447.
- Serafini, N., Klein Wolterink, R.G., Satoh-Takayama, N., Xu, W., Vosshenrich, C.A., Hendriks, R.W., and Di Santo, J.P. (2014). Gata3 drives development of ROR $\gamma$ t<sup>+</sup> group 3 innate lymphoid cells. *J. Exp. Med.* 211, 199–208.
- Schmitt, T.M., and Zúñiga-Pflücker, J.C. (2002). Induction of T cell development from hematopoietic progenitor cells by delta-like-1 in vitro. *Immunity* 17, 749–756.
- Trapnell, C., Cacchiarelli, D., Grimsby, J., Pokharel, P., Li, S., Morse, M., Lennon, N.J., Livak, K.J., Mikkelsen, T.S., and Rinn, J.L. (2014). The dynamics and regulators of cell fate decisions are revealed by pseudotemporal ordering of single cells. *Nat. Biotechnol.* 32, 381–386.
- Vivier, E., Artis, D., Colonna, M., Diefenbach, A., Di Santo, J.P., Eberl, G., Koyasu, S., Locksley, R.M., McKenzie, A.N.J., Mebius, R.E., et al. (2018). Innate lymphoid cells: 10 years on. *Cell* 174, 1054–1066.
- Vonarbourg, C., Mortha, A., Bui, V.L., Hernandez, P.P., Kiss, E.A., Hoyler, T., Flach, M., Bengsch, B., Thimme, R., Hölscher, C., et al. (2010). Regulated expression of nuclear receptor ROR $\gamma$ t confers distinct functional fates to NK cell receptor-expressing ROR $\gamma$ t<sup>+</sup> innate lymphocytes. *Immunity* 33, 736–751.
- Walker, J.A., Oliphant, C.J., Englezakis, A., Yu, Y., Clare, S., Rodewald, H.R., Belz, G., Liu, P., Fallon, P.G., and McKenzie, A.N. (2015). Bcl11b is essential for group 2 innate lymphoid cell development. *J. Exp. Med.* 212, 875–882.
- Weizman, O.E., Adams, N.M., Schuster, I.S., Krishna, C., Pritykin, Y., Lau, C., Degli-Esposti, M.A., Leslie, C.S., Sun, J.C., and O'Sullivan, T.E. (2017). ILC1 confer early host protection at initial sites of viral infection. *Cell* 171, 795–808.e12.
- Wong, S.H., Walker, J.A., Jolin, H.E., Drynan, L.F., Hams, E., Camelo, A., Barlow, J.L., Neill, D.R., Panova, V., Koch, U., et al. (2012). Transcription factor ROR $\alpha$  is critical for nuocyte development. *Nat. Immunol.* 13, 229–236.
- Xu, W., Cherrier, D.E., Chea, S., Vosshenrich, C., Serafini, N., Petit, M., Liu, P., Golub, R., and Di Santo, J.P. (2019). An Id2<sup>RFP</sup>-reporter mouse redefines innate lymphoid cell precursor potentials. *Immunity* 50, 1054–1068.e3.
- Yagi, R., Zhong, C., Northrup, D.L., Yu, F., Bouladoux, N., Spencer, S., Hu, G., Barron, L., Sharma, S., Nakayama, T., et al. (2014). The transcription factor GATA3 is critical for the development of all IL-7R $\alpha$ -expressing innate lymphoid cells. *Immunity* 40, 378–388.
- Yang, Q., Li, F., Harly, C., Xing, S., Ye, L., Xia, X., Wang, H., Wang, X., Yu, S., Zhou, X., et al. (2015). TCF-1 upregulation identifies early innate lymphoid progenitors in the bone marrow. *Nat. Immunol.* 16, 1044–1050.
- Yu, X., Wang, Y., Deng, M., Li, Y., Ruhn, K.A., Zhang, C.C., and Hooper, L.V. (2014). The basic leucine zipper transcription factor NFIL3 directs the development of a common innate lymphoid cell precursor. *eLife* 3, 04406.
- Yu, Y., Wang, C., Clare, S., Wang, J., Lee, S.C., Brandt, C., Burke, S., Lu, L., He, D., Jenkins, N.A., et al. (2015). The transcription factor Bcl11b is specifically expressed in group 2 innate lymphoid cells and is essential for their development. *J. Exp. Med.* 212, 865–874.
- Yu, Y., Tsang, J.C., Wang, C., Clare, S., Wang, J., Chen, X., Brandt, C., Kane, L., Campos, L.S., Lu, L., et al. (2016). Single-cell RNA-seq identifies a PD-1<sup>hi</sup> ILC progenitor and defines its development pathway. *Nature* 539, 102–106.
- Zhu, J. (2017). GATA3 regulates the development and functions of innate lymphoid cell subsets at multiple stages. *Front. Immunol.* 8, 1571.



## STAR★METHODS

## KEY RESOURCES TABLE

| REAGENT or RESOURCE                                  | SOURCE         | IDENTIFIER                        |
|------------------------------------------------------|----------------|-----------------------------------|
| <b>Antibodies</b>                                    |                |                                   |
| Anti-mouse CD3 (145-2C11)                            | Biolegend      | Cat#100320; RRID: AB_312685       |
| Anti-mouse CD5 (53-7.3)                              | eBioscience    | Cat#25-0051-81; RRID: AB_657755   |
| Anti-mouse CD4 (GK1.5)                               | eBioscience    | Cat#25-0041-82; RRID: AB_469576   |
| Anti-mouse CD8 (53-6.7)                              | eBioscience    | Cat#25-0081-82; RRID: AB_469584   |
| Anti-mouse CD11b (M1/70)                             | Biolegend      | Cat#101216; RRID: AB_312799       |
| Anti-mouse CD11c (N418)                              | eBioscience    | Cat#25-0114-82; RRID: AB_469590   |
| Anti-mouse CD19 (eBio1D3)                            | eBioscience    | Cat#25-0193-82; RRID: AB_657663   |
| Anti-mouse FcεRI (MAR-1)                             | eBioscience    | Cat#25-5898-82; RRID: AB_2573493  |
| Anti-mouse Ly-6C/Ly-6G (RB6-8C5)                     | eBioscience    | Cat#25-5931-82; RRID: AB_469663   |
| Anti-mouse TER-119 (TER-119)                         | eBioscience    | Cat#25-5921-82; RRID: AB_469661   |
| Anti-mouse NK1.1 (PK136)                             | eBioscience    | Cat#25-5941-82; RRID: AB_469665   |
| Anti-mouse Nkp46 (29A1.4)                            | Biolegend      | Cat#137619; RRID: AB_2562452      |
| Anti-mouse IFN-γ (XMG1.2)                            | Biolegend      | Cat#505838; RRID: AB_2629667      |
| Anti-mouse CD16/CD32 (Fc Block) (2.4G2)              | BioXCell       | Cat#BE0307; RRID: AB_2736987      |
| Anti-mouse IL-7Rα (SB/199)                           | Biolegend      | Cat#121104; RRID: AB_493502       |
| Anti-mouse CD62L (MEL-14)                            | Biolegend      | Cat#104438; RRID: AB_2563058      |
| Anti-mouse CD117 (c-Kit) (2B8)                       | Biolegend      | Cat#105824; RRID: AB_2131597      |
| Anti-mouse IL-5 (TRFK5)                              | Biolegend      | Cat#504306; RRID: AB_315330       |
| Anti-mouse CCR6 (CD196) (29-2L17)                    | Biolegend      | Cat#129814; RRID: AB_1877147      |
| Anti-mouse CD61 (HMβ3-1)                             | Biolegend      | Cat#13-0611-81; RRID: AB_466487   |
| Anti-mouse I-A/I-E (M5/144.15.2)                     | Biolegend      | Cat#107636; RRID: AB_2734168      |
| Anti-human CD2 (RPA-2.10)                            | Biolegend      | Cat#300218; RRID: AB_2566040      |
| Anti-mouse CD45 (30-F11)                             | eBioscience    | Cat#56-0451-82; RRID: AB_891454   |
| Anti-mouse CD45.2 (104)                              | eBioscience    | Cat#56-0454-82; RRID: AB_657752   |
| Anti-mouse KLRG1 (2F1)                               | eBioscience    | Cat#46-5893-82; RRID: AB_10670282 |
| Anti-mouse CD49b (DX5)                               | eBioscience    | Cat#17-5971-82; RRID: AB_469485   |
| Anti-mouse CD44 (IM7)                                | eBioscience    | Cat#17-0441-82; RRID: AB_469390   |
| Anti-mouse α4β7 Integrin (DATK32)                    | eBioscience    | Cat#46-5887-82; RRID: AB_2573793  |
| Anti-mouse PD-1 (J43)                                | BD Biosciences | Cat#565815; RRID: AB_2739366      |
| Anti-mouse Sca-1(D7)                                 | eBioscience    | Cat#45-5981-82; RRID: AB_914372   |
| Anti-mouse IL-13 (eBio13A)                           | eBioscience    | Cat#12-7133-82; RRID: AB_763559   |
| Anti-mouse CD200R (OX-110)                           | eBioscience    | Cat#46-5201-82; RRID: AB_10804765 |
| Anti-mouse CD25 (PC61.5)                             | eBioscience    | Cat# 46-0251-82; RRID: AB_2734935 |
| Anti-mouse Flt3 (CD135) (A2F10)                      | eBioscience    | Cat#46-1351-82; RRID: AB_10733393 |
| Anti-mouse Eomes (Dan 11mag)                         | eBioscience    | Cat#46-4875-82; RRID: AB_10597455 |
| Anti-mouse Tbet (eBio4B10)                           | eBioscience    | Cat#50-5825-82; RRID: AB_10596655 |
| Anti-mouse Perforin (S16009B)                        | Biolegend      | Cat#154404; RRID: AB_2721465      |
| Anti-mouse CD49a (Ha31/8)                            | BD Biosciences | Cat#564862; RRID: AB_2734135)     |
| Anti-mouse T1/ST2 (DJ8)                              | MD Bioproducts | Cat#101001B; RRID: AB_947551      |
| Anti-human/mouse/rat PLZF (D-9)                      | Santa Cruz     | Cat#sc-28319; RRID: AB_2218941    |
| <b>Chemicals, Peptides, and Recombinant Proteins</b> |                |                                   |
| Collagenase I                                        | GIBCO          | Cat#17100-017                     |
| DNase I, from bovine pancreas                        | Sigma-Aldrich  | Cat#D5025/DN25                    |
| Fixable Viability Dye eFluor780                      | Invitrogen     | Cat#65-0865-14                    |

(Continued on next page)

**Continued**

| REAGENT or RESOURCE                                                                          | SOURCE                        | IDENTIFIER                                        |
|----------------------------------------------------------------------------------------------|-------------------------------|---------------------------------------------------|
| Liberase TL, research grade                                                                  | Roche                         | Cat#385040                                        |
| PBS (endotoxin-free)                                                                         | Sigma-Aldrich                 | Cat#D1408                                         |
| Fetal Calf Serum                                                                             | GIBCO                         | Cat#10270-106                                     |
| Percoll                                                                                      | GE Healthcare                 | Cat#17-0891-01                                    |
| HEPES                                                                                        | GIBCO                         | Cat#15630-056                                     |
| 2-Mercaptoethanol                                                                            | Sigma-Aldrich                 | Cat#M6250                                         |
| RPMI 1640 + GlutaMAX                                                                         | GIBCO                         | Cat#61870-010                                     |
| IMDM                                                                                         | GIBCO                         | Cat#31980-022                                     |
| Non-EAA                                                                                      | GIBCO                         | Cat#111040-050                                    |
| Protein Transport Inhibitor Cocktail                                                         | Invitrogen                    | Cat#00-4980-93                                    |
| GolgiPlug™                                                                                   | BD Biosciences                | Cat#51-2301KZ                                     |
| 16% Paraformaldehyde, Methanol-free                                                          | ThermoScientific              | Cat#28906                                         |
| Foxp3 Staining Kit                                                                           | eBioscience                   | Cat#00-5523-00                                    |
| Cytofix/Cytoperm Plus Kit                                                                    | BD Biosciences                | Cat#555028                                        |
| PMA (phorbol 12-myristate 13-acetate)                                                        | Sigma-Aldrich                 | Cat#P8139                                         |
| Ionomycin                                                                                    | Sigma-Aldrich                 | Cat#I0634                                         |
| rmIL-7, carrier-free                                                                         | Biolegend                     | Cat#577806                                        |
| rmSCF, carrier-free                                                                          | Biolegend                     | Cat#579706                                        |
| rmIL-2, carrier-free                                                                         | Biolegend                     | Cat#575406                                        |
| rmIL-15, carrier-free                                                                        | Biolegend                     | Cat#566304                                        |
| rmIL-18, carrier-free                                                                        | Biolegend                     | Cat#767006                                        |
| Agencourt AMPure XP beads                                                                    | Beckman Coulter               | Cat#A63881                                        |
| Critical Commercial Assays                                                                   |                               |                                                   |
| Foxp3 staining kit                                                                           | eBioscience                   | Cat#00-5523-00                                    |
| Illumina Nextera XT DNA Library Preparation Kit                                              | Illumina                      | Cat#C-131-1096                                    |
| Qubit dsDNA HS assay kit                                                                     | Invitrogen                    | Cat#Q32851                                        |
| Deposited Data                                                                               |                               |                                                   |
| Single-cell RNA sequencing data                                                              | This paper                    | GEO accession number GSE131038                    |
| Experimental Models: Cell Lines                                                              |                               |                                                   |
| JM8 ES cells                                                                                 | Welcome Sanger Institute      | N/A                                               |
| Mouse: OP9                                                                                   | Sunnybrook Research Institute | <a href="#">Schmitt and Zúñiga-Pflücker, 2002</a> |
| Mouse: OP9-DL1                                                                               | Sunnybrook Research Institute | <a href="#">Schmitt and Zúñiga-Pflücker, 2002</a> |
| Experimental Models: Organisms/Strains                                                       |                               |                                                   |
| Mouse: C57BL/6JOLA                                                                           | Jackson Labs (Bred in LMB)    | Cat#000664; RRID: IMSR_JAX:000664                 |
| Mouse: CD45.1 <i>Rag2</i> <sup>-/-</sup> <i>Il2rgc</i> <sup>-/-</sup>                        | Institute Pasteur             | <a href="#">Serafini et al., 2014</a>             |
| Mouse: <i>Bcl11b</i> <sup>+tdTom</sup>                                                       | Sanger Institute              | <a href="#">Li et al., 2010</a>                   |
| Mouse: <i>Rorc</i> <sup>+Kat</sup>                                                           | MRC-LMB                       | N/A                                               |
| Mouse: <i>Id2</i> <sup>+BFP</sup>                                                            | MRC-LMB                       | N/A                                               |
| Mouse: <i>Gata3</i> <sup>+hCD2</sup>                                                         | MRC-LMB                       | N/A                                               |
| Mouse: <i>Rora</i> <sup>+Teal</sup>                                                          | MRC-LMB                       | N/A                                               |
| Mouse: <i>Zbtb16</i> <sup>tdTom</sup>                                                        | MRC-LMB                       | N/A                                               |
| Mouse: <i>Id2</i> <sup>+BFP</sup> <i>Gata3</i> <sup>+hCD2</sup> <i>Rora</i> <sup>+Teal</sup> | MRC-LMB                       | N/A                                               |
| <i>Bcl11b</i> <sup>+tdTom</sup> (4x polychromILC)                                            | MRC-LMB                       | N/A                                               |
| Mouse: <i>Id2</i> <sup>+BFP</sup> <i>Gata3</i> <sup>+hCD2</sup> <i>Rora</i> <sup>+Teal</sup> | MRC-LMB                       | N/A                                               |
| <i>Bcl11b</i> <sup>+tdTom</sup> <i>Rorc</i> <sup>+Kat</sup> (5x polychromILC)                | MRC-LMB                       | N/A                                               |
| Oligonucleotides                                                                             |                               |                                                   |
| Primer: <i>Id2</i> target verification: F1 AAATGGG<br>GGGCGTCCCAGTAGGTAGCTGGGGTGGCC (5'-3')  | Sigma-Aldrich                 | Custom made                                       |

(Continued on next page)

**Continued**

| REAGENT or RESOURCE                                                                                                          | SOURCE        | IDENTIFIER  |
|------------------------------------------------------------------------------------------------------------------------------|---------------|-------------|
| Primer: <i>Id2</i> target verification: R1<br>CTCGGATGTGCACTTGAAGTGATGGTTGTC<br>CACGGTGCCC (5'-3')                           | Sigma-Aldrich | Custom made |
| Primer: <i>Id2</i> target verification: F2 CCCTTCACA<br>CCTTCCCACCCACCGGATCCCGCCC (5'-3')                                    | Sigma-Aldrich | Custom made |
| Primer: <i>Id2</i> target verification: R2 TACAGCTTCA<br>TGTGCATGTTCTCCTTAATCAGCTCGC (5'-3')                                 | Sigma-Aldrich | Custom made |
| Primer: <i>Gata3</i> targeting verification: F1<br>CTGTTGACAATTAATCATCGGCATAGTATATCGGC (5'-3')                               | Sigma-Aldrich | Custom made |
| Primer: <i>Gata3</i> targeting verification: R1 CTCCTCC<br>TCCTTCTTCATCATCAAAGAGCC (5'-3')                                   | Sigma-Aldrich | Custom made |
| Primer: <i>Zbtb16</i> targeting verification: F1<br>AGAAGACAGGGTGCTTATGGCTGACACGTGA<br>GTGGC (5'-3')                         | Sigma-Aldrich | Custom made |
| Primer: <i>Zbtb16</i> targeting verification: R1<br>CTAAGCGCATGCTCCAGACTGCCTTGGGAA<br>AAGCG (5'-3')                          | Sigma-Aldrich | Custom made |
| Primer: <i>Zbtb16</i> targeting verification: F2<br>CCCGTGCCTTCCCTTGACCCTGAAGGTGCC<br>ACTCCC (5'-3')                         | Sigma-Aldrich | Custom made |
| Primer: <i>Zbtb16</i> targeting verification: R2 GGAGG<br>GCCTCTACCAGGTCAAGTTCAAAGCC (5'-3')                                 | Sigma-Aldrich | Custom made |
| Primer: <i>Zbtb16</i> guide RNA: G1 CCCAACACATG<br>GTAGAGCAGTGG (5'-3')                                                      | Sigma-Aldrich | Custom made |
| Primer: <i>Zbtb16</i> guide RNA: G2 CCCCCCTTAC<br>ACATAACAC AGG (5'-3')                                                      | Sigma-Aldrich | Custom made |
| Primer: <i>Rorc</i> ( $\gamma$ ) <sup>Kat</sup> genotyping: Kat F: CTGAGAG<br>GCCATAGCCAGATG (5'-3')                         | Sigma-Aldrich | Custom made |
| Primer: <i>Rorc</i> ( $\gamma$ ) <sup>Kat</sup> genotyping: Kat R: TTAGCGG<br>GTTTCTTGGATCTGT (5'-3')                        | Sigma-Aldrich | Custom made |
| Primer: <i>Rorc</i> ( $\gamma$ ) <sup>Kat</sup> genotyping: Kat Probe: FAM<br>CTGCACTGCTCCCTCAAGACCAC TAMRA (5'-3')          | Sigma-Aldrich | Custom made |
| Primer: <i>Rorc</i> ( $\gamma$ ) <sup>Kat</sup> genotyping: Rorc kat WT F:<br>GGGAGCCAAGTTCTCAGTCATG (5'-3')                 | Sigma-Aldrich | Custom made |
| Primer: <i>Rorc</i> ( $\gamma$ ) <sup>Kat</sup> genotyping: Rorc kat WT R:<br>CGGTTTCCAAGATACACTCCTATTC (5'-3')              | Sigma-Aldrich | Custom made |
| Primer: <i>Rorc</i> ( $\gamma$ ) <sup>Kat</sup> genotyping: Rorc kat WT probe: VIC<br>TCCTGTCACCATTCCTAGGCCCGC TAMRA (5'-3') | Sigma-Aldrich | Custom made |
| Primer: <i>Gata3</i> <sup>hCD2</sup> genotyping: hCD2 WT F: CACCGC<br>CATGGGTTAGAGA (5'-3')                                  | Sigma-Aldrich | Custom made |
| Primer: <i>Gata3</i> <sup>hCD2</sup> genotyping: hCD2 WT R: AACTGC<br>TCCTGCGAAAAACG (5'-3')                                 | Sigma-Aldrich | Custom made |
| Primer: <i>Gata3</i> <sup>hCD2</sup> genotyping: hCD2 WT Probe: VIC<br>CTCCACATGCGTGAGGAGTCTCCA TAMRA (5'-3')                | Sigma-Aldrich | Custom made |
| Primer: <i>Gata3</i> <sup>hCD2</sup> genotyping: hCD2 Mut F: TGGAGA<br>GGCAGAGGAAGTCT (5'-3')                                | Sigma-Aldrich | Custom made |
| Primer: <i>Gata3</i> <sup>hCD2</sup> genotyping: hCD2 Mut R: AATCAG<br>AAGGAAGCTGGCTACAA (5'-3')                             | Sigma-Aldrich | Custom made |
| Primer: <i>Gata3</i> <sup>hCD2</sup> genotyping: hCD2 Mut Probe: FAM<br>AGAATCCTGGCCCAATGAGCTTTCCA TAMRA (5'-3')             | Sigma-Aldrich | Custom made |
| Primer: <i>Rora</i> <sup>Teal</sup> genotyping: Rora teal WT F: GCCAGC<br>CATGCAAATCG (5'-3')                                | Sigma-Aldrich | Custom made |
| Primer: <i>Rora</i> <sup>Teal</sup> genotyping: Rora teal WT R: TCTTCG<br>TTGTTATTGTTTCATTTCT (5'-3')                        | Sigma-Aldrich | Custom made |

(Continued on next page)

**Continued**

| REAGENT or RESOURCE                                                                                         | SOURCE                                                                                                                                                            | IDENTIFIER            |
|-------------------------------------------------------------------------------------------------------------|-------------------------------------------------------------------------------------------------------------------------------------------------------------------|-----------------------|
| Primer: <i>Rora</i> <sup>Teal</sup> genotyping: Rora teal WT Probe: VIC ATGTGCGCGCCCGAGCACTTC TAMRA (5'-3') | Sigma-Aldrich                                                                                                                                                     | Custom made           |
| Primer: <i>Rora</i> <sup>Teal</sup> genotyping: Teal F: CCGACGACATCC CCAACTAC (5'-3')                       | Sigma-Aldrich                                                                                                                                                     | Custom made           |
| Primer: <i>Rora</i> <sup>Teal</sup> genotyping: Teal R: TGGTGCCTCC CAAGAGT (5'-3')                          | Sigma-Aldrich                                                                                                                                                     | Custom made           |
| Primer: <i>Rora</i> <sup>Teal</sup> genotyping: Teal Probe: FAM CAAGC AGTCCCTCCCGAGGGC TAMRA (5'-3')        | Sigma-Aldrich                                                                                                                                                     | Custom made           |
| Primer: <i>Id2</i> <sup>BFP</sup> genotyping: Id2 WT F: TCCCTTCTGAG CTTATGTGCAAT (5'-3')                    | Sigma-Aldrich                                                                                                                                                     | Custom made           |
| Primer: <i>Id2</i> <sup>BFP</sup> genotyping: Id2 WT R: AACATTTAACA GACACACAAGCACATT (5'-3')                | Sigma-Aldrich                                                                                                                                                     | Custom made           |
| Primer: <i>Id2</i> <sup>BFP</sup> genotyping: Id2 Probe: VIC CCT CCT GTG TGC GCG TTT CGG TAMRA (5'-3')      | Sigma-Aldrich                                                                                                                                                     | Custom made           |
| Primer: <i>Id2</i> <sup>BFP</sup> genotyping: Id2 BFP F: TGGAAGGCAG AAACGACATG (5'-3')                      | Sigma-Aldrich                                                                                                                                                     | Custom made           |
| Primer: <i>Id2</i> <sup>BFP</sup> genotyping: Id2 BFP R: GGTTTCTTGGA TCTATATGTGGTCTTG (5'-3')               | Sigma-Aldrich                                                                                                                                                     | Custom made           |
| Primer: <i>Id2</i> <sup>BFP</sup> genotyping: Id2 BFP Probe: FAM CGGGA GCCATCTGTTGCAAAC TAMRA (5'-3')       | Sigma-Aldrich                                                                                                                                                     | Custom made           |
| <b>Software and Algorithms</b>                                                                              |                                                                                                                                                                   |                       |
| Prism 7                                                                                                     | GraphPad Prism                                                                                                                                                    | RRID: SCR_002798      |
| FlowJo                                                                                                      | FlowJo, LLC                                                                                                                                                       | v10, RRID: SCR_008520 |
| R                                                                                                           | R Foundation for Statistical Computing, Vienna, Austria                                                                                                           | v3.4.1                |
| Salmon pseudoaligner                                                                                        | <a href="https://salmon.readthedocs.io/en/latest/salmon.html">https://salmon.readthedocs.io/en/latest/salmon.html</a><br>Patro et al., 2017                       | v0.8.2                |
| Scater library                                                                                              | <a href="https://bioconductor.org/packages/release/bioc/html/scater.html">https://bioconductor.org/packages/release/bioc/html/scater.html</a><br>Lun et al., 2016 | v1.6.3                |
| Surrogate Variable Analysis library                                                                         | <a href="https://bioconductor.org/packages/release/bioc/html/sva.html">https://bioconductor.org/packages/release/bioc/html/sva.html</a>                           | R package v3.26.0     |
| Scran library                                                                                               | <a href="http://bioconductor.org/packages/release/bioc/html/scran.html">http://bioconductor.org/packages/release/bioc/html/scran.html</a><br>Lun et al., 2016     | V3.8                  |
| Monocle library                                                                                             | Qiu et al., 2017a; Qiu et al., 2017b; Trapnell et al., 2014                                                                                                       | V2.6.4                |
| <b>Other</b>                                                                                                |                                                                                                                                                                   |                       |
| Sony Biotechnology SY3200                                                                                   | N/A                                                                                                                                                               | N/A                   |
| BD LSRFortessa Special Order (5 laser)                                                                      | N/A                                                                                                                                                               | N/A                   |

**CONTACT FOR REAGENTS AND RESOURCE SHARING**

Correspondence and request for materials should be addressed to Andrew McKenzie ([anm@mrc-lmb.cam.ac.uk](mailto:anm@mrc-lmb.cam.ac.uk))

**METHOD DETAILS****Mice**

All mice were bred in a specific pathogen-free facility. In individual experiments, mice were matched for age, sex and background strain and all experiments undertaken in this study were done so with the approval of the UK Home Office. *Bcl11b*<sup>tdTom</sup> mice were provided by Pentao Liu (Wellcome Sanger Institute, Cambridge, UK), *CD45.1 Rag2*<sup>-/-</sup>*Il2rgc*<sup>-/-</sup> mice were a gift from James Di Santo and C57BL/6JOLA mice were maintained in house.

### Generation of *Rorc*<sup>Kat</sup> gene-targeted mice

*Rorc*<sup>Kat</sup> mice were generated according to the strategy shown in Figure S1A. Briefly, the gene encoding Katushka fluorescent protein, followed by a loxP-flanked Neomycin cassette, was inserted directly downstream of the ATG start codon for the *Rorc* transcript. Successful targeting of JM8 ES cells was confirmed by Southern blot (Figure S1B) and the neomycin cassette was removed from the resultant mice by inter-crossing with a Cre recombinase strain. Genotyping was performed by quantitative PCR (see 'Primers').

### Generation of *Id2*<sup>BFP</sup> gene-targeted mice

The *Id2* gene was targeted by standard homologous recombination in mouse JM8 ES cells. Appropriate homologous recombination of the *Id2*-blue fluorescent protein targeting construct was confirmed at the 3' end by Southern blotting (Figures S2A and S2B). At the 5' end nested PCR using primers F1 and R1 followed by F2 and R2 was used to amplify a fragment which spanned from within the tagBFP sequence to beyond the end of the 5' arm of homology. This fragment was then sequence verified. Genotyping was performed by quantitative PCR (see 'Primers').

### Generation of *Gata3*<sup>hCD2</sup> gene-targeted mice

The *Gata3* was targeted by standard homologous recombination in mouse JM8 ES cells. Appropriate homologous recombination of the *Gata3*-human CD2 targeting construct was confirmed at the 5' end by Southern blot analysis (Figures S3A and S3B). At the 3' side PCR using primers F1 and R1 was used to amplify a fragment which spanned from within the PGK-Neo cassette to beyond the end of the 3' arm of homology. This fragment was then sequence verified. Genotyping was performed by quantitative PCR (see 'Primers').

### Generation of *Rora*<sup>Teal</sup> gene-targeted mice

*Rora*<sup>Teal</sup> mice were generated according to the strategy shown in Figure S4A. Briefly, a reporter cassette, encoding a short Gly-Ser-Gly linker peptide, FLAG epitope tag, T2A self-cleaving peptide and Teal fluorescent protein, followed by a loxP-flanked neomycin cassette, was inserted (directly upstream of the) *Rora* stop codon. Successful targeting of JM8 ES cells was confirmed by Southern blot analysis (Figure S4B) and the neomycin cassette was removed from the resultant mice by inter-crossing with a Cre recombinase strain. Genotyping was performed by quantitative PCR (see 'Primers').

### Generation of *Zbtb16*<sup>tdTom</sup> gene-targeted mice

The *Zbtb16* gene was targeted using CRISPR technology. Expression constructs encoding two guide RNA's of opposing orientation (G1 and G2) and the D10A nickase mutant of Cas9 were cotransfected into JM8 ES cells with the targeting construct shown in (Figure S5A), to mediate insertion of the cassette by homology directed repair. Appropriate insertion was confirmed at both the 5' and 3' ends by PCR amplification of fragments spanning from within the PGK-Neo cassette to beyond the ends of the respective arms of homology using primers F1 and R1 (5' side) and F2 and R2 (3' side). These fragments were then sequence verified.

### Tissue preparation

Cell suspensions of spleen, MLN, liver and thymus were obtained by passing the tissues through a 70  $\mu$ m strainer. Lung tissue was pre-digested with 750 U/mL collagenase I (GIBCO) and 0.3 mg/mL DNaseI (Sigma-Aldrich) prior to obtaining a single cell suspension. Bone marrow was removed from femurs, tibiae and hips by flushing with PBS + 2% FCS, or by centrifuging briefly at 6000 x g. For bone marrow, lung, liver and spleen cell suspensions, red blood cells were removed by incubation with RBC lysis solution (140 mM NH<sub>4</sub>Cl, 17 mM Tris; pH 7.2). Lung lymphocytes were further enriched by centrifugation in 30% percoll at 800 x g (GE Healthcare) while liver lymphocytes were enriched in 40% percoll at 690 x g.

For preparation of siLP lymphocytes, intestinal contents were removed by the application of gentle pressure along the length of the intestine. Intestines were opened longitudinally, cut into 3 cm long pieces and washed briefly by vortexing in PBS + 10 mM HEPES (PBS/HEPES). Epithelial cells were removed by incubation with RPMI supplemented with 2% FCS, 1 mM dithiothreitol and 5 mM EDTA for 2 x 20 min at 37°C with shaking (200 rpm). Intestinal pieces were washed with PBS/HEPES and incubated, with shaking, at 37°C with RPMI + 2% FCS, 0.125 KU/mL DNaseI (Sigma-Aldrich) and 62.5  $\mu$ g/mL Liberase TL (Roche) until no large pieces of intestine remained. Cells were then passed through a 70  $\mu$ m strainer, pelleted and separated over a 40%:80% gradient of Percoll at 600 x g for 20 min. siLP lymphocytes were isolated from the interface and prepared for flow cytometric analysis. Unless stated otherwise, small intestine lamina propria (siLP) includes associated Peyer's patches.

### Flow cytometry

Single cell suspensions were incubated with fluorochrome-, or biotin-, conjugated antibodies in the presence of anti-CD16/CD32 antibody (Fc block, clone 2.4G2), followed by fluorochrome-conjugated streptavidin where necessary. Antibodies were from BioLegend (CD3e (145-2C11), CD11b (M1/70), IL-7R $\alpha$  (SB/199), CD62L (MEL-14), c-Kit (2B8), IL-5 (TRFK5), CCR6 (29-2L17), CD61 (HM $\beta$ 3-1), MHCII (I-A/I-E, M5/144.15.2)); eBioscience (hCD2 (RPA-2.10), CD4 (GK1.5), CD5 (53-7.3), CD8 (53-6.7), CD19 (eBio1D3), NK1.1 (PK136), CD11c (N418), Gr-1 (RB6-8C5), Fc $\epsilon$ RI (MAR-1), Ter-119 (TER-119), CD45 (30-F11), KLRG1 (2F1), NKp46 (29A1.4), CD49b (DX5), CD44 (IM7),  $\alpha$ 4 $\beta$ 7 integrin (DATK32), PD-1 (J43), Sca-1 (D7), IL-13 (eBio13A), CD200R1 (OX-110), CD25 (PC61.5), Flt3 (A2F10), Eomes (Dan11mag), Tbet (eBio4B10), perforin (S16009B), IFN $\gamma$  (XMG1.2)); BD Biosciences (CD49a (Ha31/8)); MD Bio-products (ST2 (DJ8)) and Santa Cruz (PLZF (D-9)). 'Lineage' staining included antibodies specific for CD3, CD4, CD5, CD8, CD11b, CD11c, CD19, Fc $\epsilon$ RI, Gr-1, NK1.1 and Ter-119 (although in some instances individual lineage markers were analyzed in separate

channels, as indicated in figures). All samples were co-stained with a cell viability dye (Fixable dye eFluor780, Invitrogen) and analysis was performed on an LSRFortessa system (BD Biosciences). For cell sorting an iCyt Synergy (70  $\mu$ m nozzle, Sony Biotechnology) was used. Intracellular transcription factor staining was performed by fixation with 2% PFA for 45 min, followed by incubation with fluorochrome antibodies diluted in perm wash buffer (Foxp3 staining kit, eBioscience). Intracellular cytokine was performed using BD Cytotfix/Cytoperm Plus reagents (BD Biosciences) following pre-culture with RPMI, supplemented with 50 ng/mL phorbol 12-myristate 13-acetate (PMA), 500 ng/mL ionomycin and protein transport inhibitor (GolgiPlug®, BD Biosciences), for 4 h at 37°C.

### Adoptive transfers

Populations of mouse bone marrow cells were FACS purified into heat-inactivated mouse serum, diluted to 50% with PBS. Cell suspensions were aspirated with a syringe and implanted via tail vein injection into sublethally-irradiated (450 rad) *Rag2<sup>-/-</sup>Il2rgc<sup>-/-</sup>* recipients. Analysis of donor cell progeny was performed 5 to 6 weeks after cell transfer.

### OP9 stromal cell co-cultures

OP9 cells were maintained in complete IMDM (IMDM, supplemented with 20% FCS, 1% penicillin, 1% streptomycin, 0.1% 2-mercaptoethanol and non-essential amino acids (GIBCO)). For progenitor cell co-culture, OP9 cells were incubated with 4  $\mu$ g/mL mitomycin C for 2 h, washed, seeded at a density of  $1 \times 10^6$  cells per 96-well plate and allowed time to adhere. Sorted ILC progenitor populations were seeded onto OP9 monolayers and cultured in complete IMDM, supplemented with 25 ng/mL rmlL-7 (Biolegend) and 25 ng/mL rmSCF (Biolegend), for 7 days before flow cytometric analysis of progeny. For clonal analysis of progenitor cell potential, single cells were sorted directly onto OP9 monolayers and cultured in the presence of 25 ng/mL rmlL-7 and 25 ng/mL rmSCF for 14 - 19 days. Flow cytometric analysis was performed and wells were considered to be positive for a cell population if > 3 cells appeared within the relevant gate. For analysis of perforin and IFN- $\gamma$  expression cell subsets were seeded onto OP9 monolayers and cultured in complete IMDM, supplemented with 25 ng/mL rmlL-7 (Biolegend) and 25 ng/mL rmSCF (Biolegend), for 7 days and then stimulated with IL-2, IL-15 and IL-18 (all at 50 ng/mL) for 48 h before flow-cytometric analysis.

### Single cell RNA-sequencing and analysis

Single cell RNaseq libraries were prepared essentially as described previously (Picelli et al., 2014), with modifications as described below. Individual cells were flow cytometrically purified on a 96 well format into 0.2% Triton X-100 containing RNase inhibitor, dNTPs and oligo-dT primers and stored at -80°C. On thawing, lysates were heated to 72°C for 3 min and subject to reverse transcription, PCR preamplification (26 cycles) and PCR purification. cDNA library quality was assessed for all samples by qualitative PCR using primers for 18 s RNA with an additional check by Bioanalyzer using an Agilent high sensitivity DNA chip on a small subset of libraries. A subset of libraries was quantified using the Qubit dsDNA HS assay kit and an average value used to calculate library dilution to 100-150 pg/ $\mu$ l.

cDNA library tagmentation and amplification was performed using the Illumina Nextera XT DNA Library Preparation Kit according to manufacturer's instructions (except that all volumes were reduced to 25% of recommended volumes) and tagmentation performed at 55°C for 20 min. Nextera index and Illumina adaptor sequences were incorporated at the amplification stage (N7xx and S5xx). Amplified and indexed libraries were pooled and purified using Agencourt AMPure XP beads at a ratio of 1:0.9 library to beads and washed with 70% ethanol. Two rounds of purification were performed before a final elution in 1.25x total library volume of Nextera Resuspension buffer. Pooled indexed libraries were quantified using the Qubit dsDNA HS assay kit and this was confirmed by qPCR with adaptor specific primers. Quality was assessed by Bioanalyzer using an Agilent high sensitivity DNA chip. All pooled libraries had an average fragment length of between 500 and 800bp. Libraries were sequenced at the CRUK Cambridge NGS facility.

Reads were aligned to a modified mouse genome (v38.68), which had the 92 ERCC spike-ins added, using the Salmon pseudoaligner (v0.8.2) (Patro et al., 2017). The resulting pseudocounts were then analyzed using R (v3.4.1) (<https://www.R-project.org/>) and the scater library (v1.6.3) (McCarthy et al., 2017), scran library (v1.6.9) (Lun et al., 2016), and sva library (sva: Surrogate Variable Analysis. R package v3.26.0). Cells with pseudocounts below 3 median-absolute-deviations away from the median were removed. The same threshold was applied to number of genes detected, percentage of counts mapping to mitochondrial genes and percentage of counts mapping to spike-ins. Genes with an average count across all remaining cells of less than 1 were removed. Size factors were then calculated using the scran library (based on the gene counts) and the data normalized by them, as described previously (Lun et al., 2016). Finally, the batch effects caused by the use of different sequencing facilities were removed using the ComBat empirical Bayes framework from the sva library.

Highly variable genes were identified using the scran library, as described, with Local Polynomial Regression Fitting (loess) and  $\alpha = 0.4$ . Only genes with  $FDR \leq 0.05$  and biological component of the variance  $\geq 0.5$  were considered to be highly variable. Hierarchical clustering was performed, based on the expression of these genes, using the hclust function with the ward.D2 method. Differential expression of genes between the clusters was identified using the findMarkers function from the scran library.

A heatmap was compiled for the expression of selected genes in those bone marrow cells that lacked Spi1, Sox13, or Gata1. Tree building was performed using the hclust function with the average method.

Pseudotime analysis was performed using the monocle library (v2.6.4) (Qiu et al., 2017a; Qiu et al., 2017b; Trapnell et al., 2014). Only those bone marrow cells that did not express Spi1, Sox13, or Gata1 and that were sequenced at the CRUK (greater read depth) were selected (i.e., clusters C1-C3). Analysis was performed as described in the library documentation, with  $\rho_{\text{threshold}} = 2$  and  $\delta_{\text{threshold}} = 8$  for clustering.

**Statistical analysis**

Statistical analysis was performed using GraphPad Prism v7.0b software.

**DATA AND SOFTWARE AVAILABILITY**

Single-cell RNA sequencing data have been deposited in the Gene Expression Omnibus under accession number GEO: GSE131038.

**Immunity, Volume 51**

**Supplemental Information**

**Polychromic Reporter Mice Reveal Unappreciated  
Innate Lymphoid Cell Progenitor Heterogeneity  
and Elusive ILC3 Progenitors in Bone Marrow**

**Jennifer A. Walker, Paula A. Clark, Alastair Crisp, Jillian L. Barlow, Aydan Szeto, Ana C.F. Ferreira, Batika M.J. Rana, Helen E. Jolin, Noe Rodriguez-Rodriguez, Meera Sivasubramaniam, Richard Pannell, James Cruickshank, Maria Daly, Liora Haim-Vilmovsky, Sarah A. Teichmann, and Andrew N.J. McKenzie**



## SUPPLEMENTAL INFORMATION

### Figure S1. Generation and immune phenotyping of *Rorc*<sup>Kat</sup> mice. Related to Figure 1.

(A) Gene-targeting strategy used to generate the *Rorc*<sup>Kat</sup> strain (WT = wildtype). (B) Southern blot analysis of *EcoRV*-digested (left) and *HindIII*-digested (right) genomic DNA from WT and *Rorc*<sup>Kat/+</sup> mice (TG = Transgenic). (C) Frequency of the indicated ILC populations in the siLP of *Rorc*<sup>Kat</sup> littermates (gated as in Figure 1A). (D) Gating of thymocyte populations in *Rorc*<sup>Kat</sup> littermates. (E) Frequency of thymocyte populations in *Rorc*<sup>Kat</sup> littermates (DP = CD4<sup>+</sup>CD8<sup>+</sup>, CD4SP = CD4<sup>+</sup>CD8<sup>-</sup>, CD8SP = CD4<sup>-</sup>CD8<sup>+</sup>). (F) Rorc-Kat fluorescence of DP thymocytes from the indicated *Rorc*<sup>Kat</sup> littermates. (G) Rorc-Kat fluorescence of CD45<sup>+</sup>Lin<sup>-</sup>IL-7R $\alpha$ <sup>+</sup>CD4<sup>-</sup>KLRG1<sup>-</sup>NKp46<sup>+</sup>NK1.1<sup>+</sup> ILC3s in the siLP of *Rorc*<sup>Kat</sup> littermates. Data are representative of 2 independent experiments with 3 - 4 mice per group. Data represent mean  $\pm$  SEM; not significant (ns); one-way ANOVA with *Dunnett's* post-hoc test.

### Figure S2. Generation and immune phenotyping of *Id2*<sup>BFP</sup> mice. Related to Figure 1.

(A) Gene-targeting strategy to generate the *Id2*<sup>BFP</sup> strain and location of nested primers (F1, R1, F2 and R2) used for sequence verification of gene-targeting (WT = wildtype). (B) Southern blot analysis of *KpnI*-digested genomic DNA from wildtype and heterozygous *Id2*<sup>BFP/+</sup> mice (TG = Transgenic). (C) Id2-BFP fluorescence of splenic NK cells (CD45<sup>+</sup>CD3<sup>-</sup>CD19<sup>-</sup>NK1.1<sup>+</sup>NKp46<sup>+</sup>) from *Id2*<sup>BFP</sup> littermates. (D) Frequency of the indicated ILC populations in the siLP of *Id2*<sup>BFP</sup> littermates (gated as in Figure 1A). (E) Frequency of CD11c<sup>+</sup>MHCII<sup>+</sup> dendritic cells (DC) in the spleen of *Id2*<sup>BFP</sup> littermates. (F) Frequency of the indicated splenic lymphocytes in *Id2*<sup>BFP</sup> littermates (naïve CD4<sup>+</sup> = CD45<sup>+</sup>CD3<sup>+</sup>CD4<sup>+</sup>CD62L<sup>hi</sup>CD44<sup>lo</sup>; activated CD4<sup>+</sup> = CD45<sup>+</sup>CD3<sup>+</sup>CD4<sup>+</sup>CD62L<sup>lo</sup>CD44<sup>hi</sup>; CD25<sup>+</sup>CD4<sup>+</sup> = CD45<sup>+</sup>CD3<sup>+</sup>CD4<sup>+</sup>CD25<sup>+</sup>; CD8<sup>+</sup> = CD45<sup>+</sup>CD3<sup>+</sup>CD8<sup>+</sup>, NK1.1<sup>+</sup>NKp46<sup>+</sup> = CD45<sup>+</sup>CD3<sup>-</sup>CD19<sup>-</sup>NK1.1<sup>+</sup>NKp46<sup>+</sup>). Data are representative of 2 independent experiments with 4 - 5 mice per group. Data represent mean  $\pm$  SEM; not significant (ns); one-way ANOVA with *Dunnett's* post-hoc test.

### Figure S3. Generation and immune phenotyping of *Gata3*<sup>hCD2</sup> mice. Related to Figure 1

(A) Gene-targeting strategy to generate the *Gata3*<sup>hCD2</sup> strain and location of forward (F) and reverse (R) primers used for sequence verification of gene-targeting (WT = wildtype). (B) Southern blot analysis of *KpnI*-digested genomic DNA from wildtype and heterozygous *Gata3*<sup>hCD2</sup> mice (TG = Transgenic). Tracks either side of the dashed line were not adjacent on the original autoradiograph. (C) *Gata3*-hCD2 expression in ILC2 (CD45<sup>+</sup>Lin<sup>-</sup>IL-7R $\alpha$ <sup>+</sup>KLRG1<sup>+</sup>) from the mesenteric lymph node (MLN) of *Gata3*<sup>hCD2</sup> littermates following intraperitoneal (i.p.) injection of PBS or 0.5  $\mu$ g IL-33 i.p on 3 consecutive days. (D) Numbers of ILC2 (CD45<sup>+</sup>Lin<sup>-</sup>

IL-7R $\alpha$ <sup>+</sup>KLRG1<sup>+</sup>) in the MLN of *Gata3*<sup>hCD2</sup> littermates and C57Bl/6 controls following i.p. injection of PBS or 0.5  $\mu$ g IL-33 on 3 consecutive days. (E) Frequency of cytokine-producing ILC2 (CD45<sup>+</sup>Lin<sup>-</sup>IL-7R $\alpha$ <sup>+</sup>KLRG1<sup>+</sup>) in the MLN of *Gata3*<sup>hCD2</sup> littermates and C57Bl/6 controls following i.p. injection of 0.5  $\mu$ g IL-33 on 3 consecutive days. (F) Frequency of ILC2 (CD45<sup>+</sup>Lin<sup>-</sup>IL-7R $\alpha$ <sup>+</sup>CD25<sup>+</sup>ST2<sup>+</sup>) in lung from *Gata3*<sup>hCD2</sup> littermates and C57Bl/6 controls. (G) Frequency of ILC2P (CD45<sup>+</sup>Lin<sup>-</sup>IL-7R $\alpha$ <sup>+</sup>Flt3<sup>-</sup>Sca-1<sup>+</sup> $\alpha$ 4 $\beta$ 7<sup>int</sup>ST2<sup>+</sup>) in bone marrow from *Gata3*<sup>hCD2</sup> littermates and C57Bl/6 controls. (H) Frequency of the indicated ILC populations in the siLP of *Gata3*<sup>hCD2</sup> littermates (gated as in Figure 1A). (I) Frequency of the indicated splenic lymphocytes in *Gata3*<sup>hCD2</sup> littermates (naïve CD4<sup>+</sup> = CD45<sup>+</sup>CD3<sup>+</sup>CD4<sup>+</sup>CD62L<sup>hi</sup>CD44<sup>lo</sup>; activated CD4<sup>+</sup> = CD45<sup>+</sup>CD3<sup>+</sup>CD4<sup>+</sup>CD62L<sup>lo</sup>CD44<sup>hi</sup>; CD25<sup>+</sup>CD4<sup>+</sup> = CD45<sup>+</sup>CD3<sup>+</sup>CD4<sup>+</sup>CD25<sup>+</sup>; CD8<sup>+</sup> = CD45<sup>+</sup>CD3<sup>+</sup>CD8<sup>+</sup>, NK1.1<sup>+</sup>NKp46<sup>+</sup> = CD45<sup>+</sup>CD3<sup>-</sup>CD19<sup>-</sup>NK1.1<sup>+</sup>NKp46<sup>+</sup>). Data are representative of two independent experiments with 3 - 6 mice per group. Data represent mean  $\pm$  SEM; not significant (ns); one-way ANOVA with *Dunnett's* post-hoc test.

**Figure S4. Generation and immune phenotyping of *Rora*<sup>Teal</sup> mice. Related to Figure 1**

(A) Gene-targeting strategy used to generate the *Rora*<sup>Teal</sup> strain (WT = wildtype). (B) Southern blot analysis of *Nco1*-digested genomic DNA from wildtype and heterozygous *Rora*<sup>Teal</sup> mice (TG = Transgenic). Tracks either side of the dashed line were not adjacent on the original autoradiograph. (C) *Rora*-Teal expression in ILC2 (CD45<sup>+</sup>Lin<sup>-</sup>IL-7R $\alpha$ <sup>+</sup>KLRG1<sup>+</sup>) from the MLN of *Rora*<sup>Teal</sup> littermates and C57Bl/6 controls following i.p. injection of PBS or 0.5  $\mu$ g IL-33 i.p. on 3 consecutive days. (D) *Rora*-Teal expression in ILC2P (CD45<sup>+</sup>Lin<sup>-</sup>IL-7R $\alpha$ <sup>+</sup>ST2<sup>+</sup>) from the bone marrow of *Rora*<sup>Teal</sup> littermates and C57Bl/6 controls. (E) Numbers of ILC2 (CD45<sup>+</sup>Lin<sup>-</sup>IL-7R $\alpha$ <sup>+</sup>KLRG1<sup>+</sup>) in the MLN of *Rora*<sup>Teal</sup> littermates and C57Bl/6 controls following i.p. injection of PBS or 0.5  $\mu$ g IL-33 on 3 consecutive days. (F) Frequency of cytokine-producing ILC2 (CD45<sup>+</sup>Lin<sup>-</sup>IL-7R $\alpha$ <sup>+</sup>KLRG1<sup>+</sup>) in the MLN of *Rora*<sup>Teal</sup> littermates and C57Bl/6 controls following i.p. injection of 0.5  $\mu$ g IL-33 on 3 consecutive days. (G) Frequency of ILC2 (CD45<sup>+</sup>Lin<sup>-</sup>IL-7R $\alpha$ <sup>+</sup>CD25<sup>+</sup>ST2<sup>+</sup>) in lung from *Rora*<sup>Teal</sup> littermates and C57Bl/6 controls. (H) Frequency of ILC2P (CD45<sup>+</sup>Lin<sup>-</sup>IL-7R $\alpha$ <sup>+</sup>Flt3<sup>-</sup>Sca-1<sup>+</sup> $\alpha$ 4 $\beta$ 7<sup>int</sup>ST2<sup>+</sup>) in bone marrow from *Rora*<sup>Teal</sup> littermates and C57Bl/6 controls. (I) Frequency of the indicated ILC populations in the siLP of *Rora*<sup>Teal</sup> littermates and C57Bl/6 controls (gated as described in Figure 1A). (J) Frequency of the indicated splenic lymphocytes in *Rora*<sup>Teal</sup> littermates and C57Bl/6 controls (naïve CD4<sup>+</sup> = CD45<sup>+</sup>CD3<sup>+</sup>CD4<sup>+</sup>CD62L<sup>hi</sup>CD44<sup>lo</sup>; activated CD4<sup>+</sup> = CD45<sup>+</sup>CD3<sup>+</sup>CD4<sup>+</sup>CD62L<sup>lo</sup>CD44<sup>hi</sup>; CD25<sup>+</sup>CD4<sup>+</sup> = CD45<sup>+</sup>CD3<sup>+</sup>CD4<sup>+</sup>CD25<sup>+</sup>; CD8<sup>+</sup> = CD45<sup>+</sup>CD3<sup>+</sup>CD8<sup>+</sup>, NK1.1<sup>+</sup>NKp46<sup>+</sup> = CD45<sup>+</sup>CD3<sup>-</sup>CD19<sup>-</sup>NK1.1<sup>+</sup>NKp46<sup>+</sup>). (K) Flow cytometry gating strategy for intracellular TF staining of Lin<sup>-</sup>NK1.1<sup>+</sup> cells from the indicated tissues of *Rora*<sup>+Teal</sup> mice, compared to C57Bl/6

controls. Data are pooled from two independent experiments with 3 - 5 mice per group. Data represent mean  $\pm$  SEM; not significant (ns); one-way ANOVA with *Dunnett's* post-hoc test.

**Figure S5. Generation of *Zbtb16*<sup>tdTom</sup> mice. Related to Figure 5**

(A) Gene-targeting strategy used to generate the *Zbtb16*<sup>tdTom</sup> strain and location of primers (F1, R1, F2 and R2) used for sequence verification of gene-targeting (WT = wildtype). (B) Southern blot analysis of *HinDIII*-digested genomic DNA from *Zbtb16*<sup>tdTom</sup> targeted ES cell clone using 5' probe indicated in (A). (C) *Zbtb16*-tdTom expression in NKT cells (CD4<sup>+</sup>TCR $\beta$ <sup>lo</sup>NK1.1<sup>+</sup>) from the liver of *Zbtb16*<sup>+tdTom</sup> and WT littermates compared to intracellular staining for PLZF. (D) Frequency of CLP (Lin<sup>-</sup>CD45<sup>+</sup>IL-7R $\alpha$ <sup>+</sup>Flt3<sup>+</sup>), ILC2P (Lin<sup>-</sup>CD45<sup>+</sup>IL-7R $\alpha$ <sup>+</sup> $\alpha$ 4 $\beta$ 7<sup>+</sup>Sca1<sup>hi</sup>Flt3<sup>-</sup>CD25<sup>+</sup>), CHILP (Lin<sup>-</sup>CD45<sup>+</sup>IL-7R $\alpha$ <sup>+</sup> $\alpha$ 4 $\beta$ 7<sup>hi</sup>Sca1<sup>int/lo</sup>Flt3<sup>-</sup>CD25<sup>-</sup>), and HSC (Lin<sup>-</sup>CD45<sup>+</sup>Kit<sup>+</sup>Sca1<sup>+</sup>Flt3<sup>-</sup>) in bone marrow from *Zbtb16*<sup>+tdTom</sup> and *Zbtb16*<sup>tdTom/tdTom</sup> littermates and C57Bl/6 controls. Data representative of two independent experiments with 4 - 8 mice per genotype. (E) Frequency of the indicated ILCs from *Zbtb16*<sup>+tdTom</sup> and *Zbtb16*<sup>tdTom/tdTom</sup> littermates and C57Bl/6 controls (gated as in Figure 1A) in siLP. Data are pooled from two independent experiments with 5 - 8 mice per genotype. (F) Frequency of NKT cells as defined in (C) in the liver of *Zbtb16*<sup>+tdTom</sup> and *Zbtb16*<sup>tdTom/tdTom</sup> littermates and C57Bl/6 controls. Data pooled from four independent experiments with 12 - 15 mice per genotype. (G) Frequency of the indicated splenic lymphocytes in *Zbtb16*<sup>+tdTom</sup> and *Zbtb16*<sup>tdTom/tdTom</sup> littermates and C57Bl/6 controls (naïve CD4<sup>+</sup> = CD45<sup>+</sup>CD3<sup>+</sup>CD4<sup>+</sup>CD62L<sup>hi</sup>CD44<sup>lo</sup>; activated CD4<sup>+</sup> = CD45<sup>+</sup>CD3<sup>+</sup>CD4<sup>+</sup>CD62L<sup>lo</sup>CD44<sup>hi</sup>; CD25<sup>+</sup>CD4<sup>+</sup> = CD45<sup>+</sup>CD3<sup>+</sup>CD4<sup>+</sup>CD25<sup>+</sup>; CD8<sup>+</sup> = CD45<sup>+</sup>CD3<sup>+</sup>CD8<sup>+</sup>, NK1.1<sup>+</sup> = CD45<sup>+</sup>CD3<sup>-</sup>CD19<sup>-</sup>NK1.1<sup>+</sup>). (H) Gating strategy and *Zbtb16*-Tom expression status of LTi cells from *Zbtb16*<sup>+tdTom</sup> embryonic liver (E15.5), as compared to WT controls. Data representative of n = 9. (D-G) Data represent mean  $\pm$  SEM; not significant (ns); one-way ANOVA with *Dunnett's* post-hoc test.

**Figure S6. Gating and flow cytometry analysis of progenitor-derived ILC progeny. Related to Figure 6**

(A) Expression of T-bet in NK and ILC1 progeny arising from co-culture of the indicated bone marrow progenitor populations from 5x polychomILC mice with OP9 stromal cells and IL-2, IL-15, and IL-18 for 48 hrs. Data from one experiment. (B) Flow cytometric analysis of Bcl11b, Eomes, perforin, and IFN- $\gamma$  expression in LiveCD45.2<sup>+</sup> spleen cells stimulated with IL-2, IL-15, and IL-18, 6 weeks after transfer of IVb or IVc (CD45.2<sup>+</sup>) cells into *Rag2*<sup>-/-</sup>*Il2rgc*<sup>-/-</sup> recipients (CD45.1<sup>+</sup>). Concatenated samples from 4 - 5 mice in 2 independent experiments

**Figure S7. Extrapolation of pseudotime analysis to generate a revised model for ILC development in bone marrow. Related to Figure 7.**

(A) Individual overlays of populations I, II, III, IVa, IVb and IVc onto the pseudotime trajectory shown in main Figure 7E. Cells for which no index sequencing data were available are labelled 'undetermined'. (B) Revised model for ILC development in mouse bone marrow.

Figure S1

A

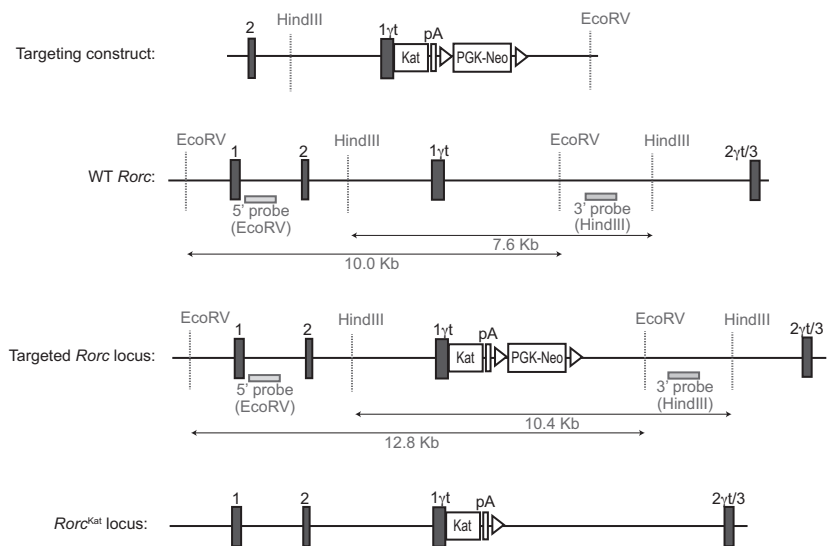

B

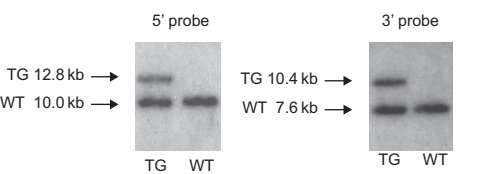

C

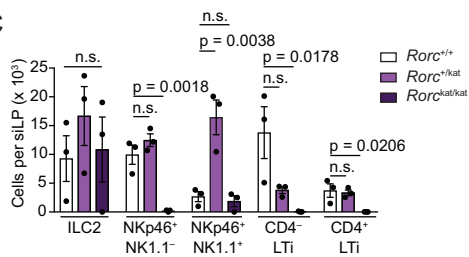

D

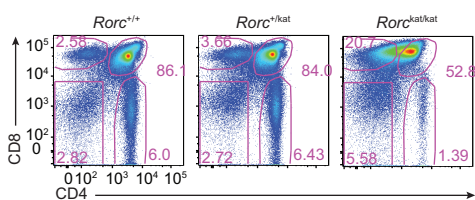

E

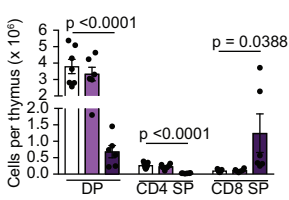

F

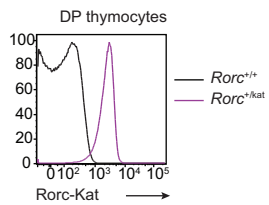

G

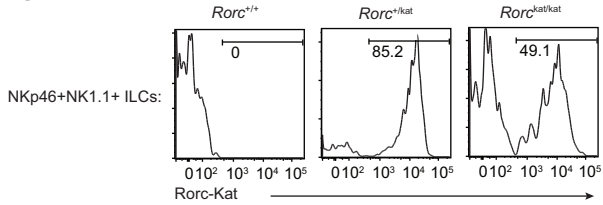

# Figure S2

## A

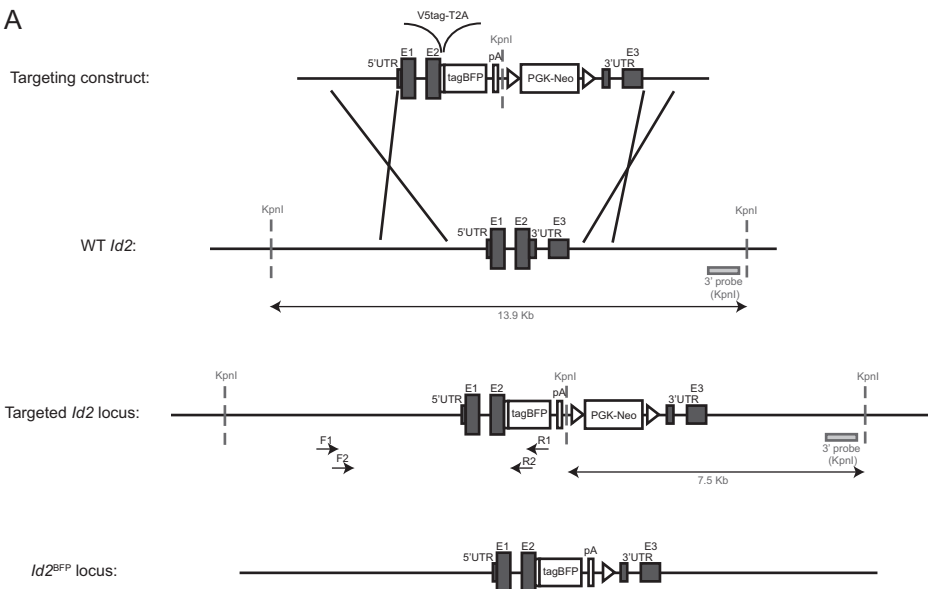

## B

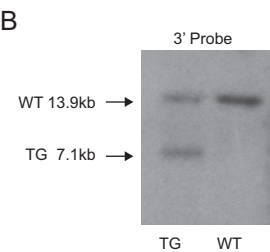

## C

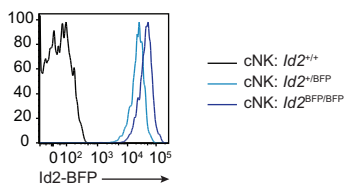

## D

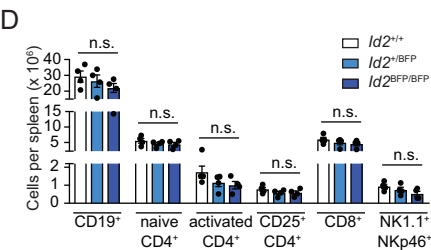

## E

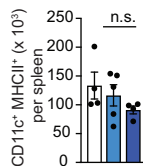

## F

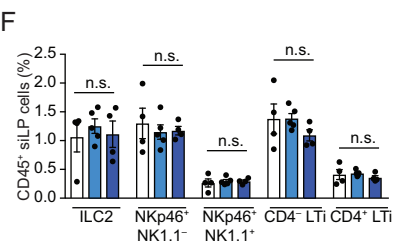

A

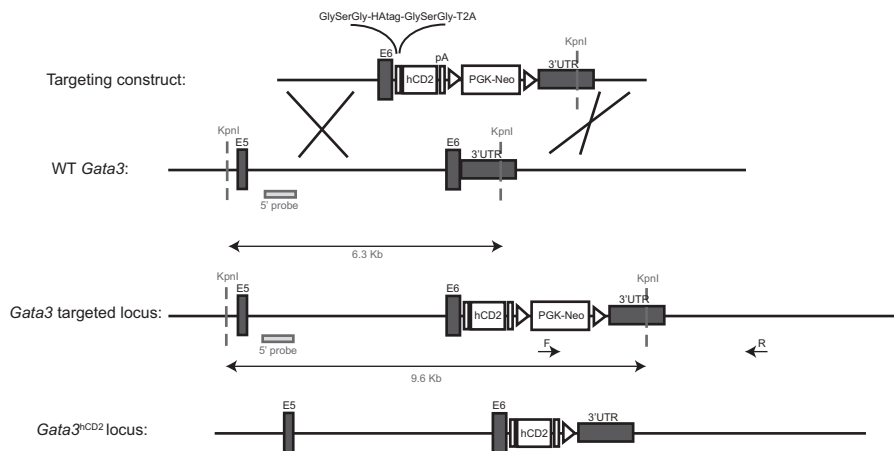

B

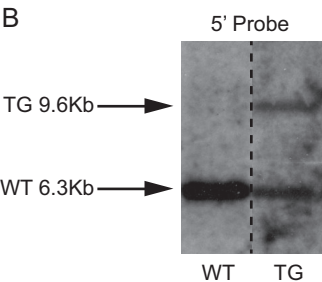

C

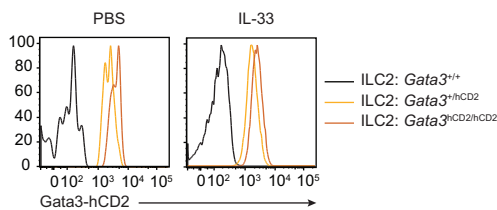

D

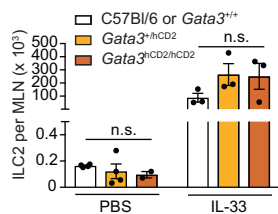

E

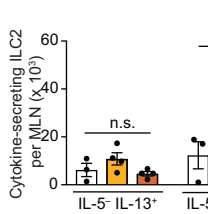

F

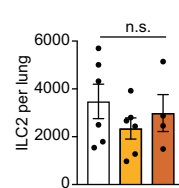

G

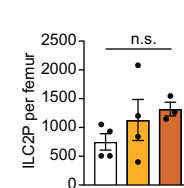

H

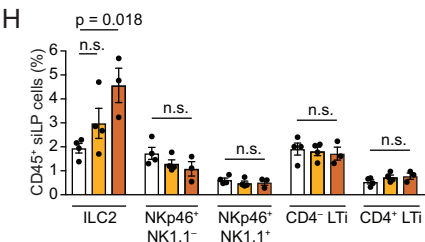

I

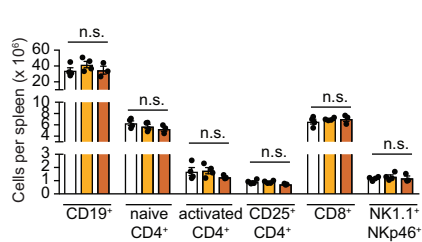

Figure S4

A

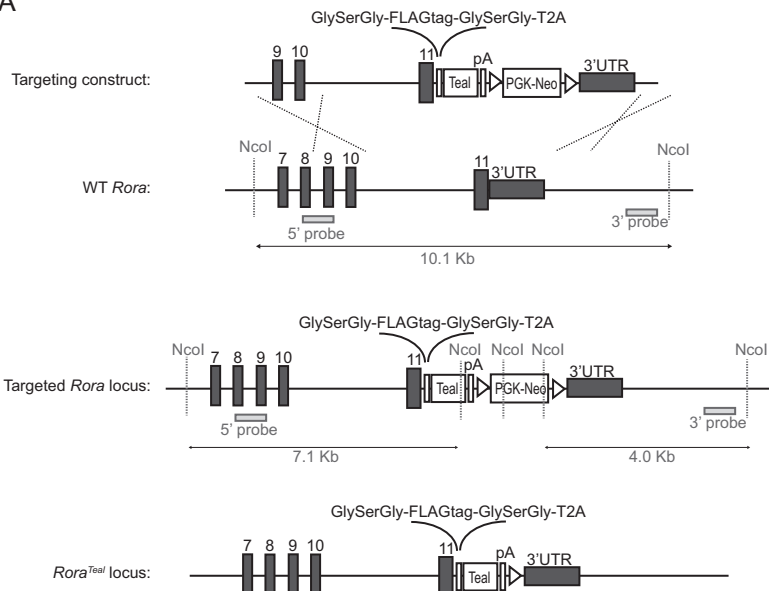

B

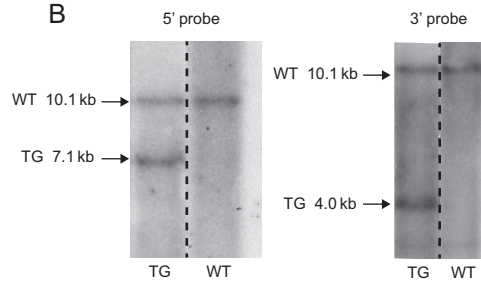

C

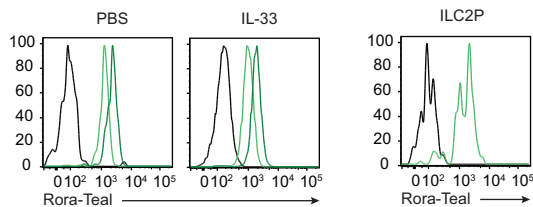

D

— ILC2: C57Bl/6  
— ILC2: *Rora*<sup>+/teal</sup>  
— ILC2: *Rora*<sup>Teal/teal</sup>

E

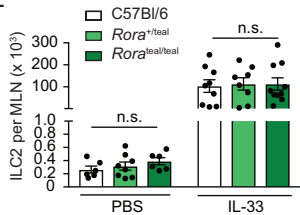

F

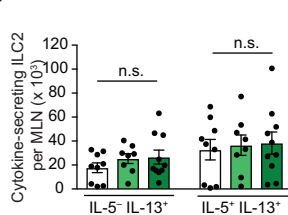

G

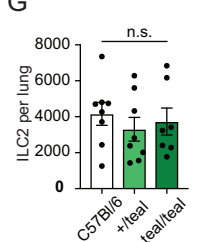

H

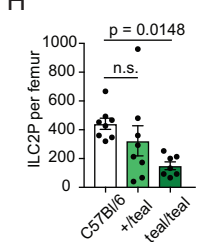

K

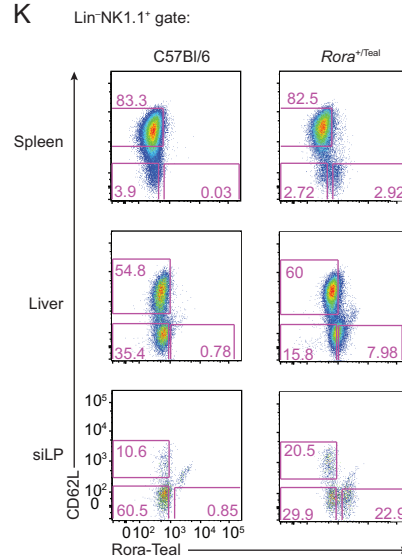

I

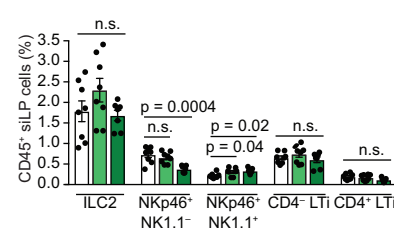

J

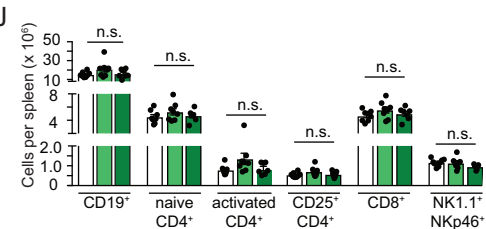



Figure S5

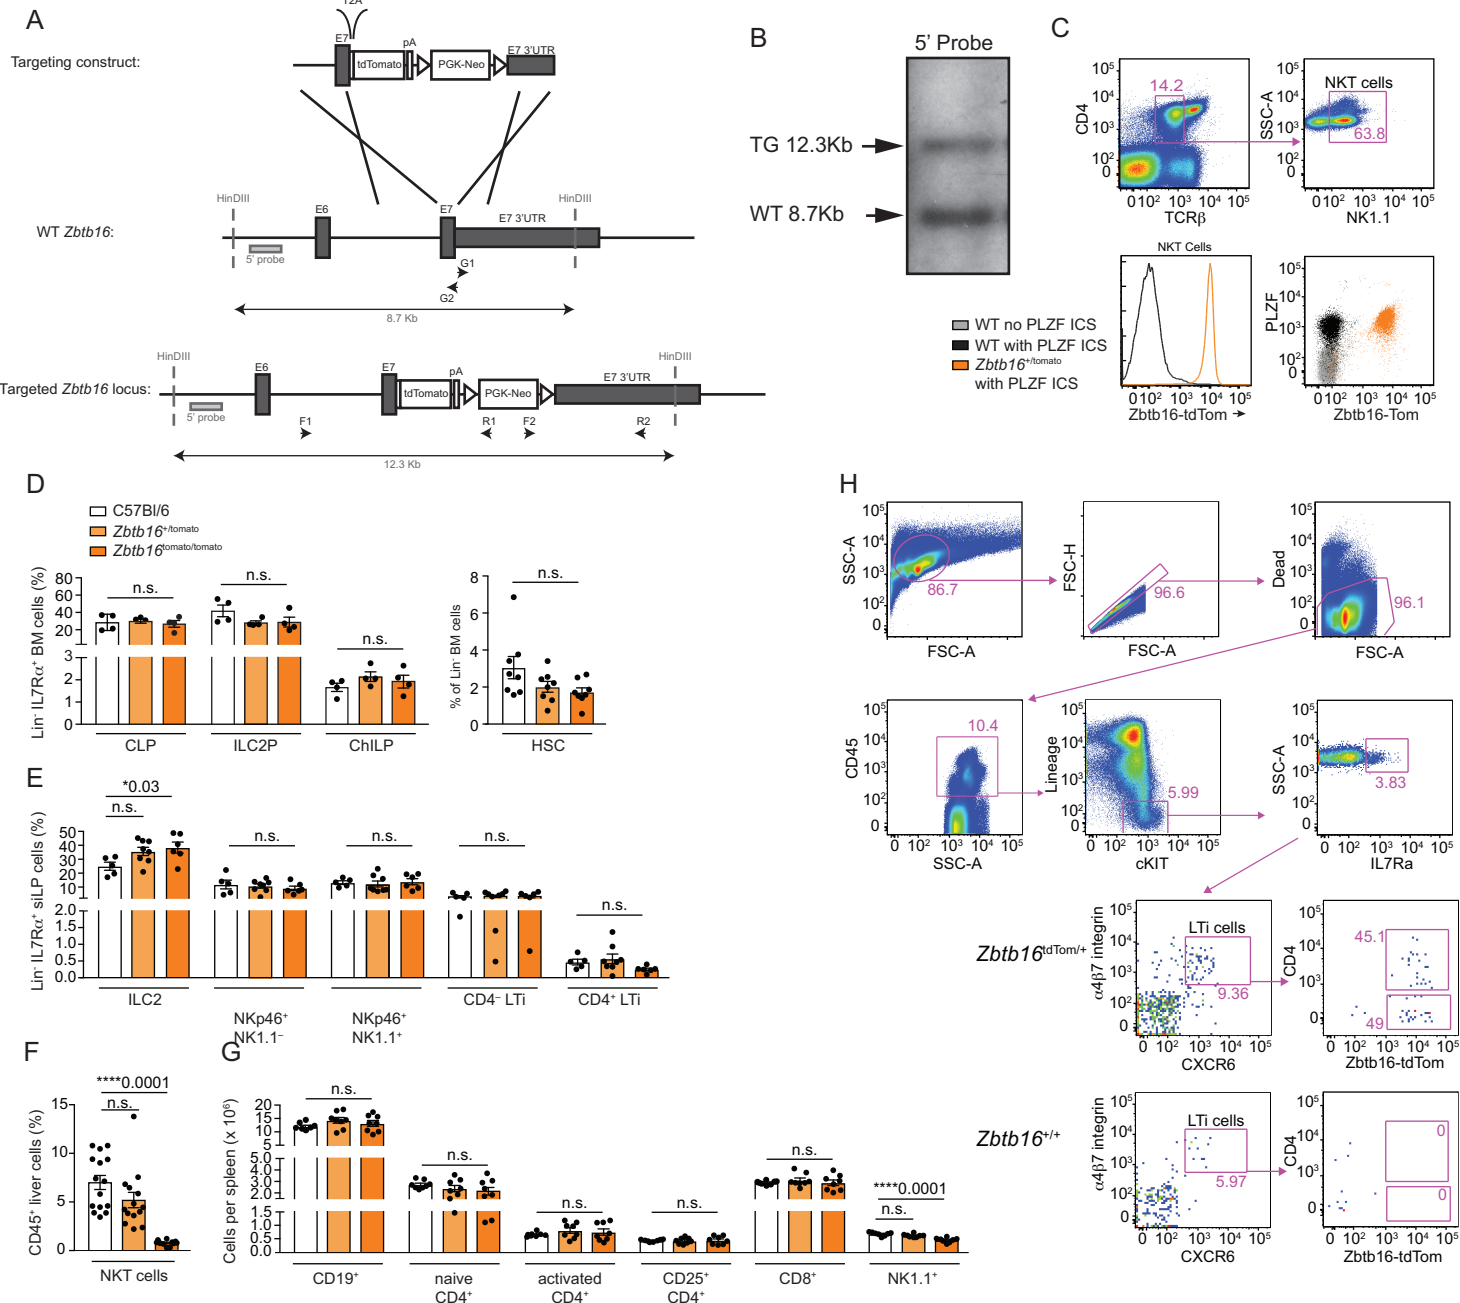

Figure S6

A

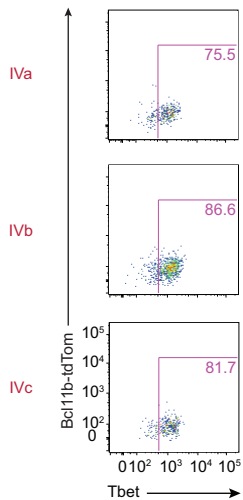

B

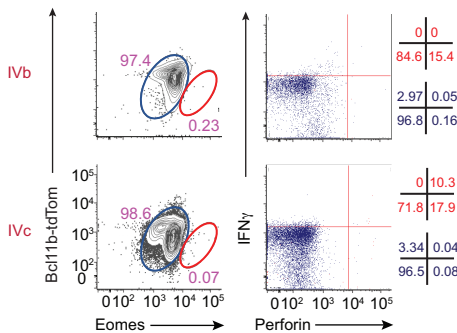

Figure S7

A

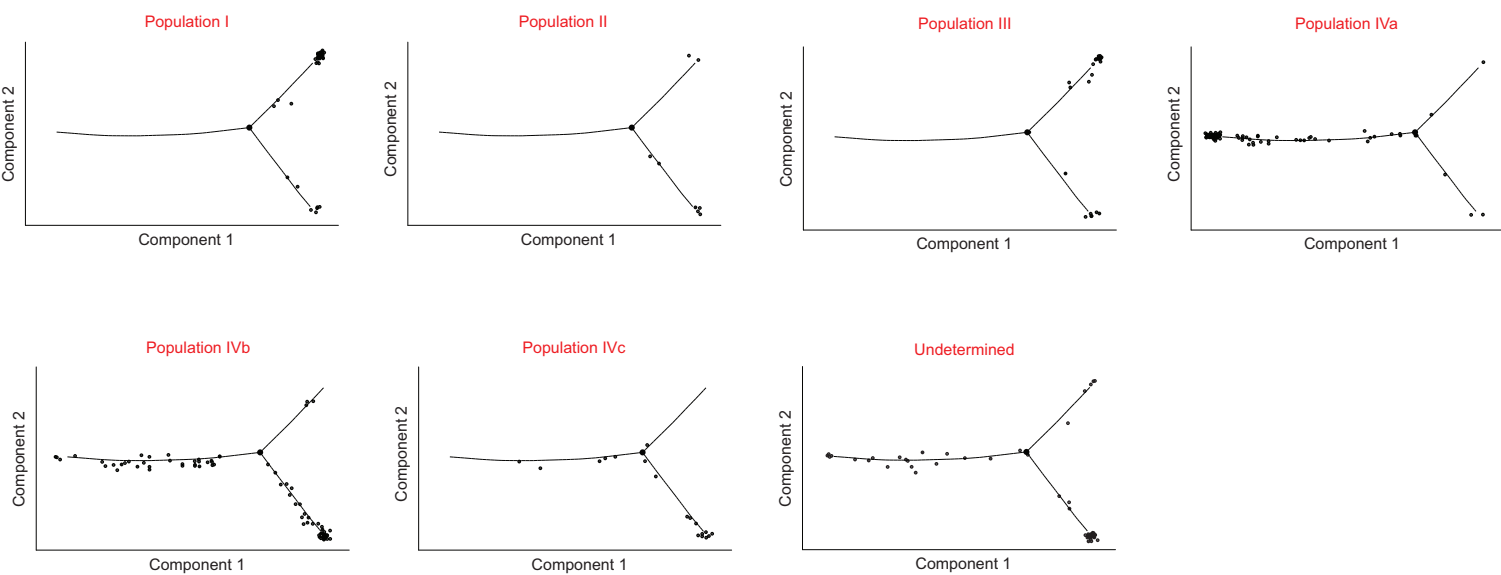

B

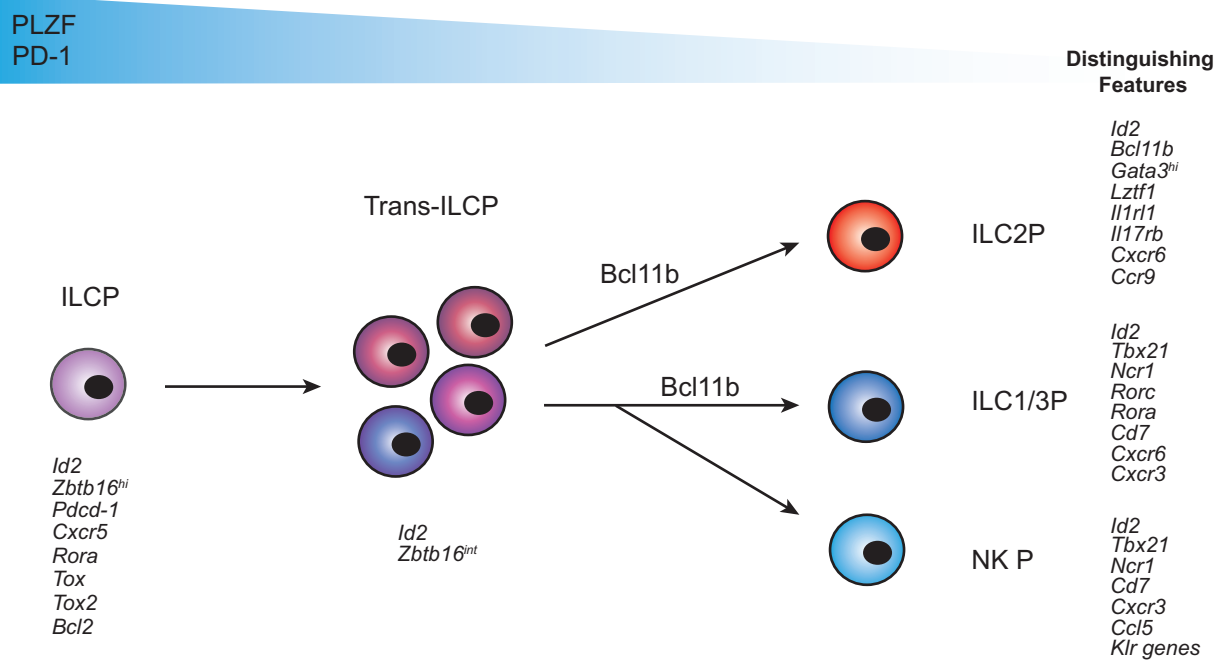

**Table S1. ILC progenitor nomenclature. Related to Figures 3 and 4.**

| Progenitor population   | Progenitor phenotype                                                                                                                                                          | In vivo progeny           | In vitro progeny                        |
|-------------------------|-------------------------------------------------------------------------------------------------------------------------------------------------------------------------------|---------------------------|-----------------------------------------|
| I                       | Lin <sup>-</sup> IL-7R $\alpha$ <sup>+</sup> Id2 <sup>+</sup> Bcl11b <sup>+</sup> CD25 <sup>+</sup> Gata3 <sup>hi</sup> $\alpha$ 4 $\beta$ 7 <sup>int</sup>                   | ILC2                      | ILC2                                    |
| II                      | Lin <sup>-</sup> IL-7R $\alpha$ <sup>+</sup> Id2 <sup>+</sup> Bcl11b <sup>+</sup> CD25 <sup>-</sup> Gata3 <sup>lo</sup> $\alpha$ 4 $\beta$ 7 <sup>lo</sup>                    | ILC2                      | ILC2                                    |
| III-lo                  | Lin <sup>-</sup> IL-7R $\alpha$ <sup>+</sup> Id2 <sup>+</sup> Bcl11b <sup>+</sup> CD25 <sup>-</sup> Gata3 <sup>lo</sup> $\alpha$ 4 $\beta$ 7 <sup>lo</sup>                    | NK + ILC2 (few ILC1/ILC2) | ILC1, ILC2, ILC3                        |
| III-hi                  | Lin <sup>-</sup> IL-7R $\alpha$ <sup>+</sup> Id2 <sup>+</sup> Bcl11b <sup>+</sup> CD25 <sup>-</sup> Gata3 <sup>hi</sup> $\alpha$ 4 $\beta$ 7 <sup>int</sup>                   | ILC2                      | ILC2                                    |
| III-lo-kat <sup>+</sup> | Lin <sup>-</sup> IL-7R $\alpha$ <sup>+</sup> Id2 <sup>+</sup> Bcl11b <sup>+</sup> CD25 <sup>-</sup> Gata3 <sup>lo</sup> $\alpha$ 4 $\beta$ 7 <sup>int</sup> Rorc <sup>+</sup> | ILC2 + ILC3               | ILC3                                    |
| IV-lo                   | Lin <sup>-</sup> IL-7R $\alpha$ <sup>+</sup> Id2 <sup>+</sup> Bcl11b <sup>-</sup> CD25 <sup>-</sup> Gata3 <sup>lo</sup> $\alpha$ 4 $\beta$ 7 <sup>mix</sup>                   | NK, ILC1, ILC2, ILC3      | Not done                                |
| IV-hi                   | Lin <sup>-</sup> IL-7R $\alpha$ <sup>+</sup> Id2 <sup>+</sup> Bcl11b <sup>-</sup> CD25 <sup>-</sup> Gata3 <sup>hi</sup> $\alpha$ 4 $\beta$ 7 <sup>mix</sup>                   | ILC2 + ILC3               | Not done                                |
| IVa                     | Lin <sup>-</sup> IL-7R $\alpha$ <sup>+</sup> Id2 <sup>+</sup> Bcl11b <sup>-</sup> CD25 <sup>-</sup> Gata3 <sup>hi</sup> $\alpha$ 4 $\beta$ 7 <sup>hi</sup>                    | NK, ILC1, ILC2, ILC3      | ILC1 + ILC2                             |
| IVb                     | Lin <sup>-</sup> IL-7R $\alpha$ <sup>+</sup> Id2 <sup>+</sup> Bcl11b <sup>-</sup> CD25 <sup>-</sup> Gata3 <sup>hi</sup> $\alpha$ 4 $\beta$ 7 <sup>lo</sup> Rorc <sup>-</sup>  | NK, ILC1, ILC2, ILC3      | ILC1 + ILC2                             |
| IVc                     | Lin <sup>-</sup> IL-7R $\alpha$ <sup>+</sup> Id2 <sup>+</sup> Bcl11b <sup>-</sup> CD25 <sup>-</sup> Gata3 <sup>hi</sup> $\alpha$ 4 $\beta$ 7 <sup>lo</sup> Rorc <sup>+</sup>  | NK, ILC1, ILC2, ILC3      | ILC1, ILC2, ILC3                        |
|                         |                                                                                                                                                                               | <b>PLZF expression</b>    | <b>Chemokine receptors</b>              |
| EILP (a)                | Lin <sup>-</sup> IL-7R $\alpha$ <sup>lo</sup> Thy1 <sup>-</sup> $\alpha$ 4 $\beta$ 7 <sup>+</sup> Kit <sup>+</sup> CD122 <sup>lo</sup> TCF7 <sup>+</sup>                      | PLZF <sup>int</sup>       |                                         |
| $\alpha$ LP (b)         | Lin <sup>-</sup> IL-7R $\alpha$ <sup>+</sup> Id2 <sup>+</sup> CD25 <sup>-</sup> $\alpha$ 4 $\beta$ 7 <sup>+</sup> Flt3 <sup>-</sup> Kit <sup>int</sup> Sca1 <sup>int</sup>    | PLZF <sup>+/-</sup>       | CXCR6 <sup>+/-</sup>                    |
| CHILP (c)               | Lin <sup>-</sup> IL-7R $\alpha$ <sup>+</sup> Id2 <sup>+</sup> CD25 <sup>-</sup> $\alpha$ 4 $\beta$ 7 <sup>hi</sup> Flt3 <sup>-</sup>                                          | PLZF <sup>+/-</sup>       |                                         |
| ILCP (a)                | Lin <sup>-</sup> IL-7R $\alpha$ <sup>+</sup> Thy1 <sup>+</sup> $\alpha$ 4 $\beta$ 7 <sup>hi</sup> Flt3 <sup>-</sup> Kit <sup>+</sup> CD122 <sup>lo</sup> TCF7 <sup>+</sup>    | PLZF <sup>hi</sup>        | CXCR5 <sup>+</sup> , CXCR6 <sup>+</sup> |

(a) (Harly et al., 2018) (b) (Seillet et al., 2016) (c) (Klose et al., 2014)
